# Supplementary material for: Posttranslational Regulation of the Exon Skipping Machinery Controls Aberrant Splicing in Leukemia
Source: Oxford University Press journal article supplement (doi:10.1158/2159-8290.cd-19-1436), 2020-05-22
Supplement: 21598290cd191436-sup-233605_2_supp_6303800_qhk89g.xlsx [file 21598290cd191436-sup-233605_2_supp_6303800_qhk89g.xlsx]

## Sheet: pVal.up.vs.bg.RNAmap_PanT_TALL
Supplementary Table 6 Motif Analysis of Skip Exon Events in T-ALL Compared to CD3 T Cells.
RBP	smallest_p_in_upstreamExon-3prime	smallest_p_in_upstreamExonIntron	smallest_p_in_upstreamIntron	smallest_p_in_targetExon-5prime	smallest_p_in_targetExon-3prime	smallest_p_in_downstreamIntron	smallest_p_in_downstreamExonIntron	smallest_p_in_downstreamExon-5prime
SRp55.[CT][CT][AT]C[AT][GC]G	0.0209127	2.80132e-06	0.0794541	0.171728	0.708637	0.0548868	0.0260528	0.256003
9G8.[AT]GGAC[AG]A	0.0043914	0.000125597	0.0912681	0.164886	0.238608	0.000193998	0.0153084	0.462347
PCBP1.CC[AT][AT][ACT]CC	0.181324	0.000283994	0.00609425	0.165842	0.000101199	0.0404552	2.06053e-05	0.0017563
PCBP1.C[CT]TTCC	0.307666	0.00030263	0.00315334	0.0258592	0.00201327	0.00643069	0.00179523	0.227572
SRp40.[CT][AG]C[AG][GT][AC]	0.164259	0.000940729	0.00166429	0.170839	0.346696	0.0856733	0.136378	0.014837
Tra2-beta.GAAAGAA	0.00238865	0.00109372	0.0156842	0.0612873	0.0180155	0.143201	0.00134097	0.15439
SNRNP70.[AG][AT]TCAAG	0.71691	0.00120707	0.267096	0.248007	0.213531	0.00596566	0.0390245	0.0136186
FXR1.A[CT]GAC[AG]	0.00797036	0.0012519	0.13094	0.00846365	0.0024816	0.00955157	0.166897	0.266521
MSI1.TAG[GT][AT][AG]G	0.169335	0.00185433	0.000399489	0.00487677	0.284695	0.010152	0.00374101	0.145473
RBMS3.[AC]TATA[GT][AC]	0.0912681	0.00192969	0.463527	0.00343485	0.0354186	0.0964529	0.0402998	0.0336823
PABPC3.[AG]AAAAC[AC]	0.218853	0.00198498	0.0187339	0.929337	0.981983	0.186224	0.0674263	0.0885619
HuR.TT[AT]GTTT	0.0592479	0.00208308	0.115979	0.4266	0.639725	0.0218642	0.0316689	0.855748
HuR.TT[GT][AG]TTT	0.133058	0.0023192	0.0561273	0.38526	0.886291	0.00149767	0.0519799	0.936185
PCBP2.CC[CT][CT]CC[ACT]	0.0764181	0.00301877	0.000834484	0.675425	0.139362	6.45161e-05	4.04663e-07	0.0876109
RBM8A.[AG][CT]GCGC[CGT]	0.147869	0.00342484	0.00910695	0.0120484	0.0335643	0.167556	1.41721e-05	0.0421457
MSI1.TAGT[AT][AG]G	0.0102353	0.00406107	0.00816645	0.0249452	0.0344004	0.00108375	0.0201188	0.158683
HNRNPK.CCA[AT][AC]CC	0.440331	0.00461159	0.0189203	0.16104	0.095176	0.424096	0.0008801	0.00262951
BRUNOL5.TGTGT[GT][GT]	0.276986	0.00551888	0.0732424	0.030702	0.0155804	0.0297661	0.030489	0.0279558
SF2-ASF.[AG]GAAGAAC	0.34688	0.0055919	0.039682	0.201558	0.472658	0.0411453	2.06102e-05	0.640404
BRUNOL4.[GT]GTGT[GT][GT]	0.238583	0.00576629	0.0468455	0.0244976	0.0452282	0.0202679	0.0591924	0.0457235
HNRNPA1.[AGT]TAGGG[AT]	0.3798	0.00594315	0.175597	0.385415	0.719838	0.0146366	0.0101584	0.0572698
HNRNPA1L2.[AGT]TAGGG[AT]	0.3798	0.00594315	0.175597	0.385415	0.719838	0.0146366	0.0101584	0.0572698
HNRNPA2B1.[AGT]TAGGG[AT]	0.3798	0.00594315	0.175597	0.385415	0.719838	0.0146366	0.0101584	0.0572698
ZNF638.[CGT]GTT[GC][GT]T	0.0976514	0.00608664	0.00333022	0.617843	0.580714	0.0187339	0.000635586	0.301531
ZC3H14.TTT[AGT]TTT	0.0207081	0.00618632	0.259188	0.402708	0.715821	1.23141e-05	0.0483649	0.878293
DAZAP1.TAG[GT][AT][AT][AG]	0.160145	0.00621445	0.0652875	0.0318646	0.0843026	0.0917224	9.32287e-06	0.00784376
FUS.CGCGC	0.702622	0.00624117	0.0117232	0.000645531	0.00386746	0.169335	0.0072176	0.0335643
MBNL1.GCTTGC	0.0785682	0.00816645	0.0103874	0.179965	0.412766	0.0111182	0.00089294	0.211022
RBM38.[GT][GT]GTGT[GT]	0.538155	0.0100478	0.140155	0.506486	0.499232	0.0106142	0.0191969	0.203868
RBM45.GACGA[AC][ACG]	0.00371667	0.0102353	0.0328035	0.639561	0.68304	0.112984	0.00872171	0.205929
SRSF1.G[AG]AGGA	0.249531	0.010796	0.00225518	0.00542256	0.0013237	0.0201264	0.0266168	0.608106
SRp20.CTC[GT]TC[CT]	0.347316	0.0112831	0.016933	0.212808	0.668906	0.0144989	0.0412116	0.0868361
TARDBP.GAATG[AGT]	0.0495864	0.0125532	0.043741	0.213531	0.136156	0.0364633	0.00516946	0.720662
A1CF.[AT]TAATT[AG]	0.704448	0.0136186	0.0661089	0.753822	0.536911	0.00239787	0.0251698	0.517449
ESRP1.TGGTGG	0.0791511	0.0147062	0.0325245	0.069545	0.0199673	0.0535987	0.000755223	0.50453
QKI.ACTAAC[ACG]	0.10428	0.0171697	0.0259893	0.286516	0.500086	0.0137386	0.00256754	0.66188
TUT1.[AC][AG]ATACT	0.697555	0.017553	0.145433	0.420473	0.37168	0.105224	0.00285915	0.0386487
SRSF1.AGGA[GC][AC]	0.413028	0.0203993	0.0845517	0.0298902	0.00177964	0.00620976	0.0255428	0.569055
CPEB4.TTTTTT	0.0192271	0.0213662	0.067853	0.700328	0.383472	0.0040863	0.0110056	0.911025
RBM3.[AG]A[AGT]AC[GT]A	0.461443	0.0244976	0.167655	0.244136	0.68933	0.151583	0.0885619	0.126626
RALY.TTTTTT[CGT]	0.106257	0.0246992	0.0638366	0.500086	0.216887	0.0125337	0.0133176	0.718496
PPRC1.[GC][GC]GCGC[GC]	0.74385	0.0253923	2.07036e-06	0.0677649	0.287999	0.145473	0.0106537	0.0892493
HuR.TTTTTT[GT]	0.0821526	0.0276338	0.0191969	0.446446	0.0565145	0.0093923	0.0138492	0.700328
ENOX1.[ACT][AG][GT]ACAG	0.385341	0.0282816	0.085594	0.146169	0.480222	5.37288e-05	0.00648157	0.04984
SART3.A[AG]AAAA[AC]	0.0229334	0.0289617	0.0147662	0.777705	0.985923	0.197673	0.0929318	0.0341167
PABPC1.A[AG]AAAA[AC]	0.0229334	0.0289617	0.0147662	0.777705	0.985923	0.197673	0.0929318	0.0341167
CPEB2.C[ACT]TTTTT	0.125243	0.0294587	0.309905	0.574612	0.412766	0.00380767	0.1157	0.287999
SAMD4A.GC[GT]GG[ACT][AC]	0.0344575	0.0295236	0.000393729	0.0345546	0.716293	0.0122767	0.00870376	0.00142441
SRSF9.A[GT]GA[ACG][AC][AG]	0.121045	0.0351024	0.342989	0.155707	0.0848756	0.000488532	0.0765985	0.511732
ZCRB1.G[AG][ACT]TTAA	0.37168	0.0354396	0.0633933	0.194813	0.313288	0.0691092	0.158539	0.356607
BRUNOL6.TGTG[AGT][GT]G	0.0607379	0.0373205	0.0332533	0.245013	0.201603	0.00328043	0.00731796	0.0286046
SFPQ.[GT]T[AG][AG]T[GT][GT]	0.119478	0.0375622	0.147788	0.14443	0.203102	0.00441003	0.0377093	0.356906
HuR.TTT[AG][GT]TT	0.0336823	0.0382312	0.0745791	0.524187	0.778886	4.42557e-05	0.105544	0.476697
SRp20.[AT]C[AT][AT]C	0.363768	0.0384858	0.250945	0.703647	0.698142	0.0090145	0.278028	0.00667151
YBX1.AACATC	0.238608	0.0389054	0.0346371	0.468793	0.714963	0.00487677	0.0936186	0.440331
PCBP3.TTT[CT]CC	0.0131759	0.0405047	0.0874398	0.301313	0.651748	0.00585298	0.043741	0.556956
RBMS1.[GT]ATATA[GC]	0.453129	0.0409099	0.0468475	0.139852	0.125014	0.104029	0.0591031	0.648784
ESRP2.TGGG[AG]A[AGT]	0.202667	0.043741	0.00104938	0.168785	0.199203	0.0661607	0.00139648	0.943577
RBM4.GCGCG[GC]G	0.931327	0.044304	0.00103824	0.0211673	0.361158	0.00618379	0.380383	0.697891
RBM47.GATGA[AT]	0.0195128	0.0445236	0.0189633	0.100383	0.202667	0.00904893	0.03294	0.0770128
RBMS3.[ACT]ATATA	0.368788	0.0446905	0.0384708	0.0147463	0.0505563	0.234448	0.144113	0.0415216
HuR.TT[AGT]TTTT	0.0134091	0.0449377	0.143758	0.183783	0.624671	1.0266e-05	0.0410131	0.861255
G3BP2.AGGAT[AGT][AG]	0.595774	0.0452699	0.0102377	0.00160617	0.0402998	0.18826	0.0308188	0.151583
RBM28.G[AT]GTAG[AGT]	0.0763689	0.047236	0.0473905	0.475679	0.551743	0.00023093	0.0279558	0.0863084
CNOT4.GACAGA	0.125059	0.047236	0.00802948	0.0362981	0.205798	0.0246997	0.0457086	0.0708638
YBX1.AACATC[AGT]	0.261322	0.0487636	0.0517988	0.522073	0.807075	0.013599	0.124912	0.339683
HNRNPH2.GGGAGGG	0.339683	0.0506484	0.000373703	0.77049	0.40022	0.00596566	0.00107597	0.289151
RBM5.[GC]AAGG[AG]G	0.132572	0.0522964	0.00772612	0.106588	0.483325	0.00218521	0.0415468	0.12747
PTBP1.[ACT][CT]TTT[CT]T	0.479937	0.0592853	0.0620186	0.519469	0.302387	0.00548009	0.460861	0.693809
KHDRBS1.TAAAA[ACG][ACG]	0.724931	0.059334	0.00639602	0.72604	0.556956	0.013359	0.0981331	0.737195
RBM5.GA[AG]GG[AT][AG]	0.0171865	0.0667732	0.0090777	0.214345	0.0805983	0.181127	0.00898259	0.582136
MATR3.[AC]ATCTT[AG]	0.0807492	0.0705248	0.0903228	0.144556	0.218943	0.047236	0.0584472	0.467819
YBX2.AACA[AT]C[AGT]	0.190862	0.0708044	0.0161375	0.343741	0.803615	0.00338843	0.23409	0.190971
RBM41.[AT]TAC[AT]T[GT]	0.0810356	0.0714352	0.28009	0.16275	0.117282	0.0191969	0.213657	0.0363861
PABPN1.A[AG]AAGA	0.0811604	0.0715049	0.0147662	0.387309	0.664852	0.00550792	0.242225	0.0505712
TIA1.TTTTT[CGT][GT]	0.0415013	0.0739408	0.0568366	0.200291	0.0125375	0.000299369	0.0208104	0.175597
HNRNPC.[ACT]TTTTT[GT]	0.0792846	0.0739408	0.115359	0.784185	0.123539	3.29814e-05	0.103312	0.552106
HNRNPCL1.[ACT]TTTTT[GT]	0.0792846	0.0739408	0.115359	0.784185	0.123539	3.29814e-05	0.103312	0.552106
SRSF1.GGA[GC]G[AG][ACG]	0.0606686	0.0750975	0.0051005	0.0357109	0.00106233	0.00105707	0.00328653	0.188113
SRSF9.[GT]G[AG][AT]G[GC][AC]	0.33993	0.0757528	0.00227771	0.0354618	0.000669425	0.00717894	0.00162024	0.00856789
U2AF2.TTTTT[CT]C	0.0636269	0.0838645	0.295596	0.558124	0.165348	0.0473512	0.267484	0.28805
PTB.CTCT[CT][CT]	0.379999	0.0901634	0.0101057	0.00205643	0.0452373	0.0105263	0.0351657	0.227256
TIA1.[AT]TTTTT[CGT]	0.118652	0.0957623	0.216489	0.514114	0.365224	8.83795e-05	0.0489378	0.324081
RBM4.GCGCG[GC][GC]	0.638805	0.100383	0.00269887	0.0363862	0.198615	0.0162315	0.0411453	0.601735
HNRNPL.A[AC]A[CT]A[AC]A	0.0374877	0.100736	0.255246	0.519429	0.766182	0.0546342	0.0256901	0.0525736
SRSF10.A[AG]AG[AG][AG][AG]	0.000150334	0.10211	0.00664761	0.388513	0.0217527	0.0037044	0.0336594	0.122026
IGF2BP2.[ACG][AC]A[ACT][AT]CA	0.0033479	0.102604	0.162524	0.678687	0.883342	0.219433	0.0193529	0.00887138
RBM24.[AT]G[AT]GTG[AGT]	0.0661841	0.103532	0.0349241	0.0517471	0.0779337	0.00195143	0.0303224	0.0458158
IGF2BP3.A[AC]A[ACT][AT]CA	0.00618628	0.110399	0.151155	0.748674	0.958352	0.0555823	0.0242194	0.165942
SRSF7.ACGACG	0.145231	0.115162	0.116557	0.0418978	0.170675	0.170675	0.0681649	0.0249452
SNRPA.[AT]TGCAC[AG]	0.0409099	0.125014	0.121782	0.125014	0.191163	0.000860538	0.0812276	0.221317
SRSF1.GG[AG]GGA[ACG]	0.405311	0.126147	2.37757e-05	0.00204052	0.00355977	7.68281e-05	0.0517471	0.411323
RBM42.AACTA[AC]G	0.090625	0.133447	0.00991136	0.231872	0.697891	0.00991136	0.0232194	0.0157668
RBM46.[AG]AT[GC]A[AT][AGT]	0.0521431	0.133703	0.00157139	0.157599	0.0762885	0.403218	0.35452	0.298778
KHDRBS2.[AG]ATAAA[AC]	0.627539	0.13711	0.00831912	0.128339	0.218853	0.241999	0.209438	0.0612873
ZC3H10.[GC][GC]AGCG[AC]	0.28325	0.140306	0.0102513	0.130812	0.000702435	0.0677649	0.00747142	0.112231
PABPC5.AGAAA[AGT]T	0.0407151	0.155413	0.0586243	0.3644	0.765995	0.150809	0.0308555	0.381662
SRSF10.AGAGA[AG][AG]	0.0135028	0.166216	0.0538823	0.28912	0.00413104	0.00430854	0.00896821	0.64143
SRSF2.GGAG[AT][AGT]	0.00255983	0.173199	0.00306712	0.157546	0.0263588	0.00516587	0.00336896	0.0408523
SRSF10.AGAGA[ACG][ACG]	0.0040684	0.187116	0.0159401	0.401008	0.109811	0.000318743	0.000986002	0.6032
HNRNPL.ACAC[AG]A[ACG]	0.189763	0.200041	0.0597715	0.0425509	0.548608	0.0380553	0.0241229	0.0319735
PABPC4.AAAAAA[AG]	0.0126288	0.209457	0.0162631	0.800107	0.993885	0.121547	0.477898	0.304468
SRSF1.GGAGGA	0.56838	0.212794	1.29206e-05	0.000957427	0.000246819	0.00052888	0.00906982	0.58779
FMR1.[GT]GACA[AG]G	0.00403085	0.218943	0.0415013	0.248007	0.43751	0.00120305	0.000509283	0.733026
RBM6.[ACT]ATCCA[AG]	0.0676694	0.225154	0.3337	0.681277	0.125249	0.0676694	0.00797142	0.0257775
HNRPLL.[AG]CA[ACT]ACA	0.000775491	0.231731	0.264633	0.166897	0.406703	0.0924302	0.251673	0.0464724
KHDRBS1.ATAAAA[ACG]	0.453973	0.237305	0.00410014	0.51066	0.397613	0.0188468	0.241999	0.216167
LIN28A.[ACT]GGAG[AT]A	0.0101958	0.243679	0.0201848	0.367388	0.124729	0.039285	0.0409859	0.0139312
KHDRBS3.ATAAA[ACG]	0.0400602	0.25338	0.144699	0.248035	0.678997	0.164802	0.0587506	0.00307621
RBFOX1.[AT]GCATG[AC]	0.85693	0.27858	0.00919708	0.535464	0.0936482	0.0362358	0.292091	0.476993
SRSF10.AGAGA[ACG][AC]	0.0619452	0.318018	0.00703444	0.716589	0.661094	0.00124586	0.0130803	0.572038
LIN28A.[CT]GGAGG[AG]	0.00906982	0.347316	0.00535439	0.0168465	0.0365082	0.0129437	0.000162983	0.0703222
ANKHD1.AGACG[AT][AT]	0.0740099	0.361158	0.0363862	0.292809	0.139852	0.00991136	0.0418978	0.861255
FXR2.[AGT]GAC[AG][AG][AG]	0.0072453	0.402486	0.0466392	0.102197	0.0956991	0.00713163	0.0013612	0.700154
