# Supplementary material for: Posttranslational Regulation of the Exon Skipping Machinery Controls Aberrant Splicing in Leukemia
Source: Oxford University Press journal article supplement (doi:10.1158/2159-8290.cd-19-1436), 2020-05-22
Supplement: 21598290cd191436-sup-233605_2_supp_6303801_qsk89g.xlsx [file 21598290cd191436-sup-233605_2_supp_6303801_qsk89g.xlsx]

## Sheet: FDR<0.05,PSI>0.1_Gene_List
Supplementary Table 7 Alternative Spliced Genes Between HR and NHR T-ALL Patients and Enrichment Analysis.
AS Genes Between HR and NHR T-ALL Patients
43530
43709
A1BG-AS1
AASDH
ABCA2
ABCA7
ABCC1
ABCD3
ABCD4
ABCF2
ABHD14A
ABHD2
ABI2
ABLIM1
ABTB1
AC004158.2
AC004893.11
AC005154.6
AC009948.5
AC010642.1
AC013394.2
AC024560.3
AC068533.7
AC091729.9
AC093838.4
AC131097.3
AC144521.1
ACACB
ACAD10
ACAD11
ACD
ACIN1
ACOX1
ACP1
ACP2
ACPL2
ACSF2
ACSF3
ACSM3
ACSS1
ACSS2
ACTR10
ACTR1A
ACTR8
ACYP2
ADAM15
ADAMTS13
ADH5
ADIPOR1
ADK
ADNP
ADRBK2
AFMID
AFTPH
AGAP2
AGBL2
AGFG2
AGGF1
AGPAT5
AGTPBP1
AHSA1
AKIP1
AKNA
AKR1C3
AKT2
ALAS1
ALDH1A2
ALG13
ALG3
ALG8
ALG9
ALMS1
ALPK1
AMZ2
ANAPC1
ANAPC4
ANAPC5
ANAPC7
ANKHD1
ANKIB1
ANKMY1
ANKRD10
ANKRD11
ANKRD13C
ANKRD17
ANKRD36
ANKRD36C
ANKRD54
ANKS3
ANKZF1
ANO9
ANP32B
ANP32E
AP1G2
AP2A2
AP3D1
AP3S1
AP4M1
AP5M1
APAF1
APBB1IP
APBB3
APC
APH1B
APITD1-CORT
APOBEC3B
APOBEC3D
APOBEC3F
APOO
APOPT1
APPL1
APPL2
APTX
AQP9
ARAP1
ARAP2
ARF4
ARHGAP12
ARHGAP15
ARHGAP17
ARHGAP25
ARHGAP26
ARHGEF7
ARID3A
ARID4A
ARID4B
ARIH1
ARL1
ARL14EP
ARL5A
ARMC8
ARRB1
ASCC1
ASCC2
ASCC3
ASH1L
ASH2L
ASPH
ASPM
ASTE1
ASUN
ATAD2
ATAD5
ATF1
ATF7
ATG10
ATG2A
ATG2B
ATG3
ATG4B
ATG5
ATG7
ATM
ATP10D
ATP11C
ATP1B3
ATP2C1
ATP5A1
ATP5G1
ATP5SL
ATP6V0A2
ATP6V1H
ATP9B
ATPAF1
ATXN3
ATXN7L1
ATXN7L2
AUP1
AURKA
AURKB
AURKC
B3GNTL1
B4GALT1
B4GALT3
B4GALT4
BAG6
BAIAP2L2
BAZ1A
BBS2
BBS7
BCAS3
BCCIP
BCL2L11
BCL2L13
BDH1
BDH2
BDP1
BECN1
BID
BIN3
BIRC5
BIRC6
BLM
BLMH
BMF
BORA
BPHL
BPTF
BRAP
BRCC3
BRD1
BRD2
BRD3
BRD4
BRD7
BRD8
BRD9
BRE
BRIP1
BRWD1
BSCL2
BTN2A2
BTN3A2
BTRC
BUD13
BZW2
C10orf118
C10orf2
C10ORF68
C10orf76
C11orf48
C11orf80
C14orf159
C14orf2
C14orf64
C14orf80
C14orf93
C15orf40
C15orf57
C16orf13
C16orf52
C16orf62
C16orf93
C17orf53
C17orf67
C17orf75
C19orf54
C1orf159
C1orf162
C1orf228
C20orf96
C21orf2
C21orf33
C21orf58
C22orf15
C2CD3
C2CD5
C2orf42
C2orf76
C3orf17
C4orf21
C4orf29
C5orf42
C6orf203
C7orf26
C7orf31
C7orf55-LUC7L2
C8orf59
C8orf76
CA5B
CA5BP1
CACFD1
CACNA1F
CACTIN
CACUL1
CAD
CALHM2
CALM1
CAMK2G
CAMKMT
CAMSAP1
CAND1
CAPN10
CAPN7
CAPRIN1
CAPRIN2
CARD8
CARF
CARHSP1
CARM1
CARNS1
CARS2
CASC15
CASD1
CASP4
CAST
CATSPER3
CBFA2T2
CBWD2
CBWD5
CBWD6
CBX8
CBY1
CC2D1B
CCAR1
CCAR2
CCDC109B
CCDC112
CCDC114
CCDC120
CCDC125
CCDC132
CCDC136
CCDC138
CCDC14
CCDC150
CCDC171
CCDC18
CCDC24
CCDC53
CCDC57
CCDC58
CCDC64
CCDC66
CCDC78
CCDC88A
CCDC88B
CCDC88C
CCDC92
CCM2
CCNA2
CCNB1IP1
CCNDBP1
CCNF
CCNG2
CCNL2
CCNT1
CCP110
CCT2
CCT4
CCT7
CCT8
CCZ1
CD109
CD1D
CD2AP
CD3E
CD44
CD46
CD47
CD53
CD55
CD6
CD69
CD86
CD96
CDAN1
CDC16
CDC42
CDIPT
CDK10
CDK11A
CDK16
CDK5RAP1
CDK6
CDK7
CDKAL1
CDPF1
CDS2
CDYL
CELF2
CELF5
CENPBD1P1
CENPE
CENPH
CENPI
CENPJ
CENPL
CENPP
CENPU
CEP128
CEP135
CEP170
CEP192
CEP250
CEP290
CEP350
CEP57
CEP57L1
CEP70
CEP76
CEP85L
CEP89
CEP95
CEP97
CERS5
CHCHD7
CHD2
CHD3
CHEK1
CHEK2
CHFR
CHID1
CHKB
CHORDC1
CHRNA5
CHRNB1
CHTOP
CIRH1A
CIT
CKAP5
CLASP2
CLDN15
CLEC16A
CLEC2D
CLEC4E
CLHC1
CLIP1
CLK1
CLN3
CLPTM1L
CLPX
CMAHP
CMC2
CNOT1
CNOT10
CNOT3
COASY
COG3
COL4A3BP
COL7A1
COLQ
COMMD10
COMMD6
COMMD8
COMMD9
COMTD1
COPB1
COPB2
COPS2
COPS3
COPS5
COPS7B
COPS8
COQ5
CORO6
COX20
COX7C
CPNE1
CPSF3
CPT1A
CPVL
CRAMP1L
CREBBP
CREBRF
CREM
CRIP1
CRTC1
CRTC3
CRY1
CSE1L
CSF3R
CSNK1G1
CSNK1G3
CSPP1
CSRP2BP
CTA-211A9.5
CTBS
CTC-360G5.8
CTC-554D6.1
CTCF
CTD-2140B24.4
CTD-2207O23.3
CTD-2245F17.3
CTNNA1
CTNNBL1
CTNND1
CTPS2
CTSA
CTSC
CUL1
CUL2
CUL3
CUL4A
CUL4B
CUL5
CUL9
CUX1
CWF19L1
CYB561D2
CYB5A
CYB5RL
CYFIP2
CYP20A1
CYP27B1
CYP2D8P
CYP2U1
D2HGDH
DAGLB
DAK
DAPK1
DARS2
DAZAP1
DBF4
DBF4B
DCAF10
DCAF13
DCAF6
DCAF7
DCAKD
DCLRE1C
DDOST
DDX11
DDX19A
DDX24
DDX26B
DDX39B
DDX52
DDX54
DDX58
DDX59
DDX6
DDX60L
DECR1
DEF8
DEK
DENND1B
DENND1C
DENND3
DENND4A
DENND4C
DENND6B
DEPDC5
DERL1
DESI1
DFFA
DGKA
DGKD
DGKZ
DHDDS
DHFR
DHODH
DHRS12
DHRS3
DHRS4
DHRS4L2
DHRS7
DHRS7B
DHX29
DHX30
DHX35
DHX36
DHX9
DIDO1
DIMT1
DIP2B
DLD
DLEU1
DLG5
DLGAP1-AS1
DLGAP5
DMPK
DMXL1
DNA2
DNAH14
DNAJB2
DNAJB6
DNAJC1
DNAJC10
DNAJC2
DNAL1
DNHD1
DNM1L
DOCK9
DONSON
DOPEY2
DOT1L
DPEP2
DPF2
DPH5
DPH7
DPP7
DPP8
DPY19L1
DPY19L2
DPY19L2P2
DRAM2
DRG2
DSCR3
DSN1
DSTYK
DTL
DTNBP1
DTX4
DXO
DYNC1I2
DYNC1LI1
E2F4
ECE1
ECI2
EDC4
EDEM2
EDEM3
EEF1D
EEPD1
EFCAB13
EFCAB2
EFCAB4B
EFCAB5
EHMT1
EHMT2
EIF2AK2
EIF2AK4
EIF2B2
EIF2B3
EIF2B4
EIF2S3
EIF3A
EIF3E
EIF3G
EIF3I
EIF4A2
EIF4E3
EIF4G1
EIF5B
ELK1
ELMO2
ELMOD2
ELMOD3
ELP2
ELP3
ELP6
EMC3
EMC7
EMID1
EML2
EML3
EMR2
ENC1
ENDOV
ENOPH1
ENOSF1
ENOX2
ENTPD4
ENTPD6
EPB41
EPC1
EPG5
EPN1
EPS15L1
EPT1
ERAP1
ERAP2
ERC1
ERCC5
ERCC6L2
ERCC8
ERGIC3
ERI1
ERI3
ERICH1
ERMARD
ERO1L
ESCO1
ESCO2
ESPL1
ESYT2
ETAA1
ETFA
ETFDH
ETV6
EVL
EWSR1
EXD2
EXO1
EXOC1
EXOC2
EXOC5
EXOG
EXOSC8
EXTL3
EZH1
EZH2
EZR
F13A1
FAAH
FAF1
FAH
FAHD2B
FAIM
FAM104A
FAM118A
FAM120B
FAM122C
FAM133B
FAM149B1
FAM188A
FAM192A
FAM193A
FAM193B
FAM208B
FAM214A
FAM221A
FAM228B
FAM35A
FAM45A
FAM49A
FAM49B
FAM65B
FAM78A
FAM86A
FAM86HP
FANCA
FANCD2
FANCI
FANCM
FASTK
FBF1
FBXL6
FBXO11
FBXO25
FBXO7
FBXW2
FCF1
FCGRT
FDFT1
FGF11
FGFR1OP
FGGY
FIP1L1
FKBP15
FKBP7
FKRP
FLOT1
FLT3LG
FLYWCH1
FLYWCH2
FMR1
FNBP1
FNBP4
FNDC3A
FNTA
FOCAD
FOXK2
FOXM1
FOXP1
FRS2
FUBP1
FUS
FUZ
FXR2
FZD6
G3BP2
GAK
GALK2
GALNT6
GALT
GAPDH
GAR1
GART
GAS5
GBGT1
GBP3
GBP5
GCFC2
GDI2
GFM1
GGT1
GIT2
GLCCI1
GLIPR2
GLRX3
GLS
GLT1D1
GMFG
GMPPA
GMPPB
GNA12
GNA15
GNMT
GNPTAB
GNPTG
GOLGB1
GON4L
GORASP1
GORASP2
GOSR2
GPALPP1
GPATCH2L
GPBP1
GPBP1L1
GPR19
GPSM2
GRAMD4
GRAP2
GRHPR
GRK4
GSDMB
GSK3B
GSKIP
GSTO1
GTDC1
GTF2B
GTF2E2
GTF3A
GTSE1
GUCD1
GUF1
GUSB
GUSBP1
GUSBP11
GXYLT2
H2AFY
HACL1
HADHA
HADHB
HAUS8
HCFC1R1
HDAC10
HDAC11
HDAC4
HDAC5
HDAC6
HDAC8
HDDC2
HDHD3
HEATR6
HEG1
HELQ
HERC1
HERC3
HERC5
HES4
HEXDC
HEXIM2
HHAT
HHIP
HIAT1
HIVEP3
HKR1
HLA-A
HMBS
HMGCL
HMGCR
HMGN3
HN1
HNRNPA1L2
HNRNPC
HNRNPD
HNRNPH1
HNRNPL
HNRNPR
HNRNPU
HPS3
HPS4
HPS5
HSD11B1L
HSD17B14
HSD17B4
HSD17B6
HSF2
HSP90AA1
HSP90AB1
HSPA4
HSPA9
HUWE1
IARS
IARS2
IBTK
ICA1L
ICAM1
IDUA
IFFO1
IFI16
IFI27L1
IFI44
IFNAR2
IFRD1
IFRD2
IFT172
IFT43
IFT88
IGF1R
IGFLR1
IGHMBP2
IKBKB
IKBKE
IKZF1
IKZF5
IL15
IL17RE
IL18BP
IL2RG
IL4R
IL9R
ILF2
ILKAP
IMMP1L
IMMT
ING4
INIP
INPP5A
INPP5F
INPPL1
INTS12
INTS2
INTS7
INTS8
INVS
IP6K2
IPO11
IPO8
IQCB1
IRF3
ISCU
ISY1
ITFG3
ITGA4
ITGA5
ITGAE
ITGAL
ITGAX
ITGB1
ITGB2
ITPA
ITPR1
ITPR2
ITSN1
ITSN2
IVD
IVNS1ABP
JADE2
JARID2
JKAMP
JMJD1C
KANSL1
KANSL2
KAT6B
KAT7
KATNA1
KCNN4
KCTD10
KCTD20
KCTD3
KDM5A
KDM5D
KDM6A
KHK
KHSRP
KIAA0020
KIAA0125
KIAA0195
KIAA0226L
KIAA0368
KIAA0586
KIAA0922
KIAA1109
KIAA1407
KIAA1429
KIAA1432
KIAA1731
KIF11
KIF15
KIF18B
KIF21B
KIF23
KIF2A
KIF4A
KIF9
KIN
KLC1
KLF12
KLF7
KLHDC4
KLHL12
KLHL28
KLRAP1
KLRD1
KMT2A
KMT2C
KMT2D
KMT2E
KNOP1
KNSTRN
KNTC1
KPNA3
KPNA5
KRBA1
KRBOX4
KRIT1
KRT72
KRTCAP2
KSR1
KTN1
KXD1
LACE1
LAG3
LAIR1
LAMP2
LAMTOR5-AS1
LANCL2
LARP1B
LARP4
LATS1
LCK
LCMT1
LCOR
LCORL
LDLRAD4
LEMD3
LETM2
LETMD1
LFNG
LGALS8
LIG1
LILRA6
LILRB2
LIMD2
LIN7B
LIN9
LINC00174
LINC00426
LINC00888
LINC01125
LINC01128
LIPC
LL22NC03-80A10.6
LLGL2
LMBR1
LMBR1L
LMBRD1
LONP1
LOXL2
LPCAT1
LPCAT3
LPHN1
LPP
LRBA
LRCH4
LRIG1
LRP5L
LRP8
LRPPRC
LRRC1
LRRC23
LRRC28
LRRC29
LRRC34
LRRC37A3
LRRC37A4P
LRRC37B
LRSAM1
LSM14B
LSS
LST1
LTBP1
LTBP4
LTBR
LTN1
LUC7L3
LY9
LYPLAL1
LYSMD4
LYST
LZIC
MACF1
MACROD1
MALSU1
MAN2C1
MANBA
MAP2K3
MAP2K5
MAP3K12
MAP3K3
MAP4K1
MAP4K3
MAP4K4
MAP4K5
MAPK1
MAPK12
MAPK3
MAPKAP1
MAPKAPK5
MAPKBP1
MARK3
MARS
MARVELD1
MASTL
MBD4
MBD5
MBOAT7
MBP
MCCC1
MCCC2
MCM6
MCM8
MCOLN1
MCRS1
MCTS1
MDM1
ME3
MED10
MED12L
MED15
MED17
MED22
MED23
MED24
MED6
MEFV
MEGF6
MEI1
MELK
MEMO1
METTL14
METTL21A
METTL25
METTL4
METTL8
MFSD1
MFSD10
MFSD8
MFSD9
MGA
MGAT1
MGEA5
MGME1
MGST3
MICAL1
MICALL1
MICU2
MIEF1
MINK1
MINPP1
MIOS
MIPEP
MIS18BP1
MKNK2
MLH1
MLH3
MLLT1
MLST8
MLTK
MMAB
MND1
MNDA
MOB1B
MOB3A
MOCS2
MORC2
MORN4
MOSPD1
MPDU1
MPHOSPH8
MPHOSPH9
MRE11A
MROH6
MRPL21
MRPL48
MRPL52
MRPL55
MRPS10
MRRF
MS4A3
MS4A6A
MSL3
MSMO1
MSTO1
MT1F
MTA1
MTA3
MTERFD2
MTF2
MTFR1
MTG1
MTHFSD
MTIF2
MTIF3
MTMR1
MTMR3
MTMR6
MTMR9LP
MTOR
MUM1
MUTYH
MVK
MX1
MXD3
MYB
MYEF2
MYNN
MYO15B
MYO7B
N4BP2L2
N6AMT2
NAA15
NAB1
NADK
NAF1
NAGLU
NAGPA
NANS
NAP1L1
NAP1L4
NAPA
NAPEPLD
NAPRT1
NARF
NARG2
NAT9
NBEAL2
NBN
NBPF12
NBPF14
NBPF3
NCAPG
NCAPG2
NCOA3
NCOA6
NCOR1
NCOR2
NDC1
NDC80
NDE1
NDOR1
NDUFA3
NDUFA8
NDUFAF7
NDUFB8
NDUFS4
NDUFV2
NEIL3
NEK10
NEK3
NEK8
NEK9
NEMF
NEO1
NETO2
NEXN
NF1
NFATC3
NFKBIB
NFRKB
NFU1
NFX1
NFYB
NGLY1
NIFK
NINL
NIPA2
NIPAL3
NIPBL
NIPSNAP3A
NISCH
NIT2
NKTR
NLRP3
NME4
NME6
NME7
NMI
NMRK1
NNT
NOA1
NOL10
NOL8
NOLC1
NOMO1
NONO
NPAT
NPC1
NPEPPS
NPHP3
NPHP4
NPIPB5
NPM1
NPR2
NPRL2
NQO1
NR2C1
NR4A2
NRD1
NRSN2
NSD1
NSMCE2
NSUN2
NSUN5P1
NSUN6
NT5C2
NT5C3B
NUBP1
NUCKS1
NUDT17
NUDT2
NUDT21
NUDT4
NUDT9
NUF2
NUMA1
NUP107
NUP160
NUP188
NUP214
NUP54
NUP62
NUP85
NUSAP1
NVL
NXF1
OARD1
OBSCN
OCIAD1
OCIAD2
ODF3B
OGFOD1
OGFOD3
OGFR
OGT
OMA1
OPLAH
OPTN
ORAOV1
ORC6
OSBPL2
OVGP1
OXNAD1
OXSM
P4HTM
PABPC1L
PACRGL
PACSIN2
PAIP1
PAM
PANK2
PANK4
PAPD7
PAPOLA
PAQR6
PARD3
PARN
PARP10
PARP12
PARP14
PARP3
PASK
PAXBP1
PBK
PBRM1
PBX4
PCBP1-AS1
PCCA
PCDHGB2
PCGF6
PCM1
PCMT1
PCNX
PCNXL2
PCYOX1
PDGFA
PDIA3
PDK1
PDS5A
PDSS1
PECR
PER1
PET112
PEX1
PEX14
PEX26
PGAP2
PGGT1B
PGM2
PGS1
PHB2
PHC1
PHC2
PHF1
PHF10
PHF12
PHF14
PHF20
PHF7
PHKG1
PHTF1
PHYKPL
PI4KAP2
PI4KB
PIGB
PIGF
PIGG
PIGP
PIGQ
PIGT
PIGU
PIGX
PIK3R6
PILRB
PIM2
PITPNA
PITPNM2
PIWIL4
PKD1
PKMYT1
PKN2
PKP4
PLA2G4B
PLCB1
PLCB3
PLCG1
PLD3
PLEKHA7
PLEKHM1
PLK1S1
PLK3
PLK4
PLSCR1
PLXNB1
PM20D2
PMF1-BGLAP
PMPCA
PMPCB
PMS1
PNISR
PNPLA6
PNPLA7
PNPO
POC1A
POLB
POLD1
POLG
POLG2
POLH
POLL
POLM
POLQ
POLR1B
POLR2G
POLR2H
POLR2J4
POMGNT1
POMT1
PORCN
POU6F1
PPCDC
PPFIBP2
PPHLN1
PPID
PPIE
PPIL2
PPIL3
PPM1A
PPOX
PPP1R21
PPP1R2P4
PPP1R3E
PPP1R7
PPP2CA
PPP2R2A
PPP2R2D
PPP2R3B
PPP2R3C
PPP2R4
PPP2R5C
PPP3CC
PPP4C
PPP4R1
PPP4R1L
PPP6R3
PPRC1
PPT2-EGFL8
PQLC3
PRCP
PRDM15
PREB
PREP
PREX1
PRKD3
PRKRA
PRKRIP1
PRMT2
PROCA1
PRPF3
PRPF40B
PRPF4B
PRPF6
PRPSAP2
PRR12
PRR13
PRR14
PRR14L
PRR5
PRRC2B
PRRC2C
PRRT1
PRSS53
PRUNE
PRUNE2
PSD4
PSMA1
PSMA2
PSMA7
PSMB1
PSMC2
PSMD1
PSMD14
PSMD5
PSMD9
PSME4
PSMG1
PSMG2
PSTPIP1
PTBP3
PTEN
PTGES3L-AARSD1
PTPN2
PTPRA
PTPRC
PUM2
PUS7L
PVT1
PWP2
PWWP2B
PXK
PXMP4
PYGL
PYGM
PYROXD2
QARS
QPRT
QRICH2
QRSL1
QTRT1
R3HDM1
RAB11FIP3
RAB1A
RAB24
RAB3A
RAB3GAP1
RAB7A
RAB8B
RABEP1
RABEP2
RABGAP1
RABGAP1L
RABGGTA
RABGGTB
RACGAP1
RAD17
RAD18
RAD51AP1
RAD51B
RAD51D
RAD54B
RAD54L
RALGAPA1
RALGAPB
RALGDS
RALY
RANBP2
RAPGEFL1
RARS
RASA2
RASA4
RASA4CP
RASSF4
RB1
RB1CC1
RBL1
RBM23
RBM39
RBM41
RBM6
RBPJ
RC3H2
RCC1
RCC2
RCL1
RCN2
RECK
REL
RELL2
RERE
REV3L
REXO2
RFC2
RFC4
RFPL3S
RFT1
RFWD2
RFX2
RFX5
RGPD8
RHBDD3
RHOBTB1
RHOT1
RHPN1
RIC8B
RILP
RINT1
RIOK1
RLTPR
RMND1
RNASEH2B
RNF10
RNF121
RNF123
RNF138
RNF14
RNF146
RNF167
RNF2
RNF8
RNH1
ROCK1
RORA
RP1-1J6.2
RP1-309K20.6
RP11-108K14.4
RP11-120D5.1
RP11-12J10.3
RP11-1379J22.5
RP11-1407O15.2
RP11-143J12.2
RP11-155D18.12
RP11-156P1.3
RP11-164J13.1
RP11-206L10.2
RP11-20E24.1
RP11-21J18.1
RP11-244H3.4
RP11-250B2.3
RP11-274B21.1
RP11-286N22.8
RP11-295P9.3
RP11-308D16.4
RP11-345J4.5
RP11-345J4.8
RP11-349A22.5
RP11-356I2.4
RP11-385D13.1
RP11-421L21.3
RP11-455F5.5
RP11-468E2.2
RP11-473M20.14
RP11-561C5.4
RP11-696N14.1
RP11-69E11.4
RP11-706O15.1
RP11-809C9.2
RP11-81H14.2
RP11-977G19.10
RP13-279N23.2
RP4-539M6.19
RP4-717I23.3
RP4-769N13.6
RP5-1021I20.4
RP5-977B1.7
RPAP1
RPF1
RPF2
RPL10
RPL17
RPL22L1
RPL35A
RPL5
RPL6
RPP30
RPP40
RPRD1B
RPS11
RPS12
RPS24
RPS3
RPS6KA3
RPS6KA5
RPS6KC1
RPTOR
RQCD1
RRBP1
RREB1
RRN3
RRN3P2
RRNAD1
RRP1B
RRP8
RSF1
RSRC1
RSRC2
RTFDC1
RTKN
RTTN
RUFY3
RUNX3
RWDD1
RXRA
SAAL1
SAMD9
SAMHD1
SAR1A
SARS
SARS2
SBDSP1
SCAF11
SCAI
SCAMP3
SCAP
SCAPER
SCARB1
SCCPDH
SCFD1
SCLT1
SCLY
SCMH1
SCNN1D
SCRN3
SCYL3
SDCCAG8
SDHAP1
SDHC
SEC14L2
SEC24B
SEC24C
SEC31A
SEC31B
SEC61A2
SECISBP2
SEL1L3
SEMA6C
SENP3
SENP3-EIF4A1
SENP6
SENP7
SEPN1
SEPT7P2
SERF2
SERGEF
SERPINA1
SERPINB8
SERPINE1
SESN1
SETD3
SETD7
SETMAR
SF3B1
SFI1
SFPQ
SFSWAP
SFT2D1
SFXN5
SGK1
SGOL1
SH3D21
SH3TC1
SH3YL1
SHC1
SHMT2
SIGIRR
SIGLEC10
SIPA1
SIPA1L1
SIPA1L2
SIRPA
SKA3
SKIV2L
SKIV2L2
SKP2
SLAIN1
SLAMF1
SLAMF7
SLC11A2
SLC12A4
SLC12A6
SLC17A5
SLC20A1
SLC20A2
SLC22A17
SLC24A1
SLC25A12
SLC25A13
SLC25A19
SLC25A20
SLC25A23
SLC25A26
SLC25A30
SLC25A36
SLC26A6
SLC27A3
SLC29A2
SLC2A11
SLC30A4
SLC30A5
SLC30A6
SLC33A1
SLC35A1
SLC35A3
SLC35F6
SLC37A3
SLC38A10
SLC38A7
SLC39A11
SLC39A9
SLC43A3
SLC44A1
SLC44A2
SLC48A1
SLC4A1
SLC4A1AP
SLC4A8
SLC5A6
SLC6A6
SLC7A6
SLC8B1
SLC9A8
SLC9B1
SLIT1
SLMAP
SLTM
SLU7
SMAD4
SMARCA2
SMARCAL1
SMC3
SMC5
SMCHD1
SMEK1
SMIM7
SMPD4
SMU1
SMURF2
SMYD2
SNAPC4
SND1
SNHG12
SNHG15
SNHG17
SNHG6
SNHG7
SNIP1
SNRNP70
SNRPN
SNX11
SNX14
SNX19
SNX5
SNX6
SORD
SP100
SPAG5
SPATA13
SPATA5L1
SPC24
SPEG
SPG11
SPG20
SPG7
SPIDR
SPIN1
SPNS1
SPTLC2
SREBF1
SREBF2
SREK1
SRGAP3
SRP19
SRP54
SRPK2
SRRM1
SRSF1
SRSF3
SRSF4
SRSF5
SRSF7
SSB
SSBP2
SSBP3
SSFA2
SSH1
SSH2
ST3GAL3
ST3GAL6
ST6GALNAC4
ST6GALNAC6
STAG1
STAG2
STAG3L1
STAG3L3
STAG3L4
STAG3L5P-PVRIG2P-PILRB
STARD9
STAT2
STAT5A
STIL
STK16
STK17A
STK25
STRADB
STT3A
STT3B
STX16
STX16-NPEPL1
STX2
STXBP3
STXBP4
STXBP5
SUB1
SUCO
SUGP1
SUGP2
SUMF2
SUN2
SUOX
SUPT20H
SUPT3H
SUPV3L1
SURF1
SUSD1
SUV39H2
SUZ12
SV2A
SYCE1L
SYNCRIP
SYNJ2
SYNRG
SYPL1
SYTL3
SZT2
TACC3
TADA2A
TAF11
TAF15
TAF1A
TAF1D
TAMM41
TANC1
TANC2
TANGO2
TARBP1
TARBP2
TARSL2
TASP1
TATDN3
TBC1D13
TBC1D2
TBC1D22A
TBC1D2B
TBC1D7
TBCCD1
TBCD
TBCE
TBCEL
TBK1
TBL3
TCEA1
TCEA2
TCEAL1
TCEB1
TCF25
TCF3
TCFL5
TCOF1
TCP1
TCP11L1
TCTN3
TDP1
TDRD3
TDRD7
TECPR1
TELO2
TEN1-CDK3
TEP1
TESK2
TESPA1
TEX10
TEX264
TFDP2
THADA
THOC1
THOC5
THUMPD2
THUMPD3
TIA1
TIMM17A
TINF2
TIPRL
TJAP1
TK2
TLDC1
TLE1
TLE3
TLK2
TM6SF1
TM7SF2
TM7SF3
TM9SF1
TM9SF2
TM9SF4
TMA16
TMBIM1
TMBIM6
TMC8
TMCO1
TMCO4
TMED10
TMED5
TMEM106C
TMEM116
TMEM126B
[truncated: 319 more rows]

## Sheet: LR_HR_rMATS_KEGG
Term	Overlap	P-value	Adjusted P-value	Old P-value	Old Adjusted P-value	Odds Ratio	Combined Score	Genes
Ubiquitin mediated proteolysis	35/137	4.39509e-06	0.00135369	0	0	2.20522	27.2014	UBE3C;CUL5;UBA7;UBE2D2;CUL3;UBE2D3;CUL2;CUL1;UBE3A;RHOBTB1;HERC3;HERC1;UBE2Q2;UBR5;BTRC;SKP2;UBE2F;PPIL2;ANAPC7;UBE2B;SMURF2;UBE2C;HUWE1;UBE4A;CUL4A;UBE2W;CDC16;ANAPC4;ERCC8;ANAPC5;BIRC6;TRIM37;TRIP12;ANAPC1;CUL4B
Cell cycle	32/124	8.86413e-06	0.00136508	0	0	2.22757	25.9145	RB1;GSK3B;CUL1;TTK;SMC3;PKMYT1;ORC6;CHEK2;CHEK1;E2F4;SKP2;ZBTB17;CREBBP;SMAD4;ANAPC7;CCNA2;STAG1;CDK7;WEE1;STAG2;CDK6;RBL1;DBF4;TFDP2;ESPL1;CDC16;ANAPC4;ANAPC5;ATM;MCM6;TP53;ANAPC1
RNA transport	38/165	2.34691e-05	0.00180712	0	0	1.98794	21.1911	CYFIP2;EIF4A2;NUP107;NUP188;FMR1;RPP30;NUP160;NXF1;FXR2;XPO1;NUP85;NUP62;XPO5;PAIP1;NUP214;NDC1;RANBP2;EIF2B4;EIF5B;EIF2B3;EIF2B2;RPP40;THOC1;UPF3B;TRNT1;THOC5;SRRM1;EIF2S3;DDX39B;EIF3I;TACC3;EIF3G;ACIN1;NUP54;EIF3E;PABPC1L;EIF3A;EIF4G1
Lysine degradation	19/59	2.15635e-05	0.00221385	0	0	2.77975	29.867	KMT2E;SUV39H2;KMT2D;SETD3;KMT2A;PHYKPL;EHMT2;KMT2C;SETD7;DOT1L;EHMT1;SETMAR;ASH1L;CAMKMT;HADHA;NSD1;DLD;EZH1;EZH2
Autophagy	29/128	0.000278178	0.0171357	0	0	1.95565	16.0114	BECN1;MTMR3;ITPR1;PTEN;IGF1R;RPTOR;PPP2CA;AKT2;RB1CC1;LAMP2;MLST8;MAPK1;SUPT20H;ATG7;ATG5;MAPK3;ATG3;UVRAG;DAPK1;ATG10;TSC1;WIPI1;EIF2AK4;MTOR;VMP1;ATG2A;ATG4B;ATG2B;RAB7A
Homologous recombination	13/41	0.00050094	0.0257149	0	0	2.73693	20.798	TOP3B;BLM;BRCC3;RAD54B;RAD51B;BRIP1;RAD51D;POLD1;UIMC1;RAD54L;ATM;NBN;TOPBP1
Pyrimidine metabolism	15/57	0.00167416	0.0736631	0	0	2.27154	14.5207	ENTPD4;ENTPD6;CAD;NUDT2;CTPS2;NME4;NT5C2;UCKL1;DHODH;NT5C3B;NME6;NME7;TK2;UPP1;UMPS
Human T-cell leukemia virus 1 infection	40/219	0.00233211	0.0897861	0	0	1.57659	9.55571	RB1;CRTC3;CRTC1;ITGB2;PTEN;CD3E;ITGAL;IL2RG;ELK1;ICAM1;IKBKB;POLB;PPP3CC;XPO1;CHEK2;AKT2;CHEK1;MAPK1;MAPK3;STAT5A;MAP3K3;CREBBP;SMAD4;ANAPC7;IL15;NFYB;NFATC3;HLA-A;CCNA2;ESPL1;LCK;CDC16;VDAC3;ANAPC4;ATM;ANAPC5;TCF3;LTBR;TP53;ANAPC1
Lysosome	25/123	0.0035007	0.119802	0	0	1.75444	9.921	IDUA;NAGPA;MFSD8;AP4M1;CLN3;GNPTAB;NAGLU;AP1G2;LAMP2;ATP6V0A2;SLC17A5;ATP6V1H;ACP2;AP3S1;GUSB;CTSC;CTSA;ABCA2;MANBA;ENTPD4;SLC11A2;AP3D1;MCOLN1;GNPTG;NPC1
Phosphatidylinositol signaling system	21/99	0.00422178	0.130031	0	0	1.831	10.011	MTMR1;DGKD;MTMR3;DGKA;INPPL1;ITPR1;PTEN;ITPR2;SYNJ2;DGKZ;MTMR6;PLCB3;INPP5A;INPP5F;PLCG1;PI4KB;CALM1;PLCB1;CDIPT;IP6K2;CDS2
Glycosylphosphatidylinositol (GPI)-anchor biosynthesis	8/25	0.00563775	0.144702	0	0	2.76219	14.3034	PIGB;PIGU;PIGT;PIGQ;PIGP;PIGG;PIGF;PIGX
Cellular senescence	30/160	0.00520781	0.145819	0	0	1.61847	8.50927	RB1;SERPINE1;ITPR1;PTEN;ITPR2;LIN9;FOXM1;PPP3CC;CHEK2;AKT2;CHEK1;MAPK1;NBN;E2F4;BTRC;MAPK3;MAP2K3;NFATC3;TSC1;HLA-A;MAPK12;MTOR;CCNA2;CDK6;RBL1;VDAC3;ATM;CALM1;TP53;PPID
Other types of O-glycan biosynthesis	7/22	0.00979557	0.23208	0	0	2.7465	12.7048	LFNG;B4GALT3;B4GALT1;POMT1;GXYLT2;OGT;ST3GAL3
Shigellosis	14/65	0.0153788	0.263148	0	0	1.85917	7.76159	ITGB1;ROCK1;UBE2D2;MAPK12;IKBKB;CDC42;ELMO2;MAPK1;ITGA5;BTRC;CD44;MAPK3;ATG5;NFKBIB
Oocyte meiosis	23/125	0.0164024	0.265892	0	0	1.58826	6.52827	ANAPC7;CUL1;ITPR1;ITPR2;PPP2R5C;SMC3;PKMYT1;MAPK12;IGF1R;AURKA;PPP2CA;RPS6KA3;PPP3CC;ESPL1;CDC16;ANAPC4;MAPK1;ANAPC5;BTRC;CALM1;CAMK2G;ANAPC1;MAPK3
Viral carcinogenesis	34/201	0.015082	0.273251	0	0	1.46011	6.12409	RB1;HDAC4;HDAC5;SP100;HDAC10;GTF2B;HDAC11;UBR4;UBE3A;RBPJ;HDAC8;GTF2E2;HDAC6;POLB;CDC42;CHEK1;MAPK1;SKP2;MAPK3;STAT5A;CREBBP;EIF2AK2;HLA-A;SND1;CCNA2;CDK6;RBL1;IRF3;TRAF3;RASA2;VDAC3;REL;LTBR;TP53
Protein processing in endoplasmic reticulum	29/165	0.0143986	0.277174	0	0	1.51711	6.4335	TRAM1;HSP90AB1;SAR1A;UBE2D2;UBE2D3;NGLY1;CUL1;DERL1;RRBP1;SEC61A2;DNAJB2;ATXN3;UGGT1;SEC31B;SEC31A;PDIA3;EDEM3;HSP90AA1;SEC24B;EDEM2;EIF2AK2;EIF2AK4;DDOST;DNAJC1;DNAJC10;STT3A;PREB;STT3B;SEC24C
Mismatch repair	7/23	0.0127003	0.279407	0	0	2.62709	11.4702	RFC4;LIG1;RFC2;EXO1;POLD1;MLH1;MLH3
Kaposi sarcoma-associated herpesvirus infection	32/186	0.0142603	0.292811	0	0	1.48505	6.31187	RB1;CD86;GSK3B;BECN1;ITPR1;ITPR2;PIK3R6;ICAM1;IKBKB;PREX1;TBK1;PPP3CC;AKT2;MAPK1;PLCG1;BID;IKBKE;MAPK3;IFNAR2;ATG3;CREBBP;STAT2;NFATC3;EIF2AK2;HLA-A;MAPK12;MTOR;CDK6;IRF3;TRAF3;CALM1;TP53
Hepatitis C	27/155	0.0197559	0.304241	0	0	1.50361	5.90063	RB1;SCARB1;GSK3B;PPP2R2A;IKBKB;PPP2CA;TBK1;RXRA;AKT2;MAPK1;BID;IKBKE;MAPK3;IFNAR2;APAF1;DDX58;STAT2;MX1;EIF2AK2;EIF2AK4;CDK6;CLDN15;IRF3;TRAF3;PPP2R2D;EIF3E;TP53
NOD-like receptor signaling pathway	30/178	0.0223934	0.328437	0	0	1.45481	5.52679	HSP90AB1;ITPR1;ITPR2;BRCC3;MEFV;IKBKB;PSTPIP1;TBK1;IFI16;CASP4;NLRP3;MAPK1;DNM1L;IKBKE;ATG5;GBP3;MAPK3;IFNAR2;GBP5;HSP90AA1;CARD8;STAT2;TRPV2;MAPK12;PLCB3;IRF3;TRAF3;VDAC3;PLCB1;NFKBIB
Epstein-Barr virus infection	33/201	0.0245609	0.343852	0	0	1.41717	5.25288	RB1;PSMD14;RBPJ;CD3E;ITGAL;ICAM1;IKBKB;TBK1;BCL2L11;AKT2;PSMD1;SKP2;BID;IKBKE;PDIA3;MAP2K3;IFNAR2;APAF1;DDX58;STAT2;EIF2AK2;HLA-A;RUNX3;MAPK12;NCOR2;CCNA2;CDK6;IRF3;TRAF3;PSMC2;TP53;CD44;NFKBIB
mTOR signaling pathway	26/152	0.0269192	0.360483	0	0	1.4765	5.33743	PRR5;GSK3B;NPRL2;MAPKAP1;PTEN;IGF1R;IKBKB;RPTOR;RPS6KA3;AKT2;MLST8;ATP6V1H;MAPK1;SKP2;MAPK3;WDR59;MIOS;STRADB;FZD6;TSC1;MTOR;CLIP1;TBC1D7;DEPDC5;SGK1;TELO2
Base excision repair	8/33	0.0313935	0.386768	0	0	2.09257	7.24271	POLB;MBD4;PARP3;NEIL3;LIG1;POLD1;POLL;MUTYH
Terpenoid backbone biosynthesis	6/22	0.0349063	0.39819	0	0	2.35414	7.89835	MVK;FNTA;PDSS1;HMGCR;DHDDS;PCYOX1
mRNA surveillance pathway	17/91	0.0311293	0.399493	0	0	1.61254	5.59489	DAZAP1;CPSF3;UPF3B;PPP2R2A;PPP2R3B;PPP2R5C;SRRM1;PPP2CA;NXF1;NUDT21;DDX39B;FIP1L1;PPP2R3C;PPP2R2D;PAPOLA;ACIN1;PABPC1L
Spliceosome	23/134	0.0345277	0.409021	0	0	1.48159	4.98701	ISY1;SRSF1;THOC1;HNRNPU;PRPF40B;USP39;U2SURP;PRPF6;DDX39B;SNRNP70;PRPF3;SRSF3;PPIE;ACIN1;SRSF4;SRSF5;HNRNPC;TXNL4A;SRSF7;HNRNPA1L2;SLU7;SF3B1;CTNNBL1
Th17 cell differentiation	19/107	0.037942	0.417362	0	0	1.53276	5.01472	STAT5A;SMAD4;HSP90AA1;IL4R;HSP90AB1;NFATC3;RORA;CD3E;IL2RG;MAPK12;MTOR;IKBKB;PPP3CC;RXRA;LCK;MAPK1;PLCG1;NFKBIB;MAPK3
Inositol phosphate metabolism	14/74	0.0431987	0.4292	0	0	1.63305	5.13096	MTMR1;MTMR3;INPPL1;PTEN;SYNJ2;MTMR6;MINPP1;PLCB3;INPP5A;INPP5F;PLCG1;PI4KB;PLCB1;CDIPT
Fanconi anemia pathway	11/54	0.0429953	0.441418	0	0	1.75834	5.53291	TOP3B;FANCI;BLM;BRIP1;FANCM;FANCD2;REV3L;FANCA;MLH1;POLH;TELO2
Glioma	14/75	0.0476721	0.444939	0	0	1.61128	4.90378	RB1;SHC1;PTEN;PDGFA;MTOR;IGF1R;CDK6;AKT2;MAPK1;PLCG1;CALM1;TP53;CAMK2G;MAPK3
Measles	23/138	0.0462291	0.444955	0	0	1.43864	4.42259	IFNAR2;STAT5A;GSK3B;APAF1;DDX58;STAT2;MX1;EIF2AK2;EIF2AK4;CD3E;IL2RG;IKBKB;TBK1;CDK6;IRF3;TRAF3;AKT2;CD46;BID;TP53;IKBKE;SLAMF1;NFKBIB
Mannose type O-glycan biosynthesis	6/23	0.0427437	0.453968	0	0	2.25179	7.09883	B4GALT3;B4GALT1;FKRP;POMT1;POMGNT1;ST3GAL3
Glyoxylate and dicarboxylate metabolism	7/30	0.0515975	0.467413	0	0	2.0141	5.97036	GRHPR;ACSS2;PCCA;SHMT2;AFMID;ACSS1;DLD
Sphingolipid signaling pathway	20/119	0.0557171	0.476691	0	0	1.45073	4.18894	CERS5;ABCC1;ROCK1;PTEN;PPP2R2A;PPP2R3B;PPP2R5C;MAPK12;PPP2CA;PLCB3;SPTLC2;PPP2R3C;AKT2;GNA12;PPP2R2D;MAPK1;PLCB1;BID;TP53;MAPK3
Non-homologous end-joining	4/13	0.0544988	0.479589	0	0	2.65595	7.7277	DCLRE1C;XRCC4;POLM;POLL
N-Glycan biosynthesis	10/50	0.058098	0.483627	0	0	1.72637	4.9126	B4GALT3;ALG8;B4GALT1;ALG9;STT3A;ALG13;ALG3;MGAT1;STT3B;DDOST
Steroid biosynthesis	5/19	0.0603999	0.489557	0	0	2.27154	6.37568	CYP27B1;MSMO1;LSS;TM7SF2;FDFT1
Human immunodeficiency virus 1 infection	32/212	0.0709549	0.546352	0	0	1.30292	3.44715	CUL5;CUL1;ITPR1;ITPR2;CD3E;SAMHD1;IKBKB;TBK1;PPP3CC;AP1G2;AKT2;CHEK1;MAPK1;PLCG1;BTRC;BID;MAPK3;PDIA3;MAP2K3;APOBEC3D;APOBEC3F;NFATC3;HLA-A;MAPK12;MTOR;CUL4A;WEE1;IRF3;ATM;CALM1;APOBEC3B;CUL4B
Glycosphingolipid biosynthesis	9/45	0.0700573	0.553273	0	0	1.72637	4.58945	B4GALT3;B4GALT1;SLC33A1;ST3GAL6;ST6GALNAC4;GBGT1;B4GALT4;ST3GAL3;ST6GALNAC6
Aminoacyl-tRNA biosynthesis	12/66	0.0748858	0.562557	0	0	1.56943	4.06763	SARS2;QARS;TARSL2;RARS;MARS;SARS;DARS2;IARS2;IARS;QRSL1;VARS2;CARS2
Nucleotide excision repair	9/47	0.0876577	0.627874	0	0	1.65291	4.0237	CUL4A;CDK7;RFC4;LIG1;RFC2;POLD1;ERCC8;ERCC5;CUL4B
Hedgehog signaling pathway	9/47	0.0876577	0.642823	0	0	1.65291	4.0237	GSK3B;CSNK1G3;SMURF2;HHIP;CUL3;CUL1;ARRB1;BTRC;CSNK1G1
Valine, leucine and isoleucine degradation	9/48	0.0973557	0.666346	0	0	1.61847	3.77004	MCCC2;HADHB;HMGCL;HADHA;PCCA;IVD;MCCC1;ACSF3;DLD
Peroxisome	14/83	0.0952398	0.666679	0	0	1.45597	3.42352	ABCD4;PECR;ABCD3;MVK;ECI2;HSD17B4;PEX1;PEX14;PEX26;DHRS4;HMGCL;ACOX1;PXMP4;HACL1
Synthesis and degradation of ketone bodies	3/10	0.100001	0.669573	0	0	2.58956	5.96264	HMGCL;BDH2;BDH1
Human papillomavirus infection	46/330	0.105661	0.677994	0	0	1.20323	2.70427	RB1;ITGB1;GSK3B;UBR4;PTEN;PPP2R2A;UBE3A;RBPJ;LFNG;IKBKB;PPP2CA;CDC42;TBK1;PPP2R3C;AKT2;ATP6V0A2;ATP6V1H;MAPK1;IKBKE;HES4;MAPK3;IFNAR2;CREBBP;ITGA4;STAT2;FZD6;MX1;EIF2AK2;TSC1;PPP2R3B;HLA-A;PPP2R5C;MTOR;CCNA2;CDK6;RBL1;IRF3;APC;NFX1;TRAF3;PARD3;PPP2R2D;ATM;ITGA5;TP53;LLGL2
Th1 and Th2 cell differentiation	15/92	0.108104	0.679512	0	0	1.40737	3.13091	STAT5A;IL4R;NFATC3;CD3E;RBPJ;IL2RG;RUNX3;MAPK12;IKBKB;PPP3CC;LCK;MAPK1;PLCG1;MAPK3;NFKBIB
Progesterone-mediated oocyte maturation	16/99	0.105563	0.691771	0	0	1.39505	3.1367	HSP90AA1;HSP90AB1;ANAPC7;PKMYT1;MAPK12;IGF1R;AURKA;CCNA2;RPS6KA3;AKT2;CDC16;ANAPC4;MAPK1;ANAPC5;ANAPC1;MAPK3
DNA replication	7/36	0.115965	0.700339	0	0	1.67842	3.61609	RNASEH2B;RFC4;LIG1;RFC2;POLD1;MCM6;DNA2
Influenza A	25/171	0.131456	0.710322	0	0	1.26197	2.56064	GSK3B;ICAM1;IKBKB;NXF1;TBK1;XPO1;AKT2;TRIM25;NLRP3;MAPK1;IKBKE;MAPK3;MAP2K3;IFNAR2;IVNS1ABP;CREBBP;DDX58;STAT2;MX1;EIF2AK2;EIF2AK4;MAPK12;DDX39B;IRF3;NFKBIB
Hepatitis B	24/163	0.129671	0.71319	0	0	1.27095	2.59623	RB1;MAP2K3;STAT5A;CREBBP;SMAD4;APAF1;DDX58;STAT2;NFATC3;ELK1;MAPK12;IKBKB;CCNA2;TBK1;IRF3;TRAF3;AKT2;VDAC3;BIRC5;MAPK1;BID;TP53;IKBKE;MAPK3
T cell receptor signaling pathway	16/101	0.120447	0.713416	0	0	1.36742	2.89421	VAV3;GSK3B;NFATC3;CD3E;MAPK12;IKBKB;CDC42;PTPRC;PPP3CC;LCK;AKT2;GRAP2;MAPK1;PLCG1;NFKBIB;MAPK3
GnRH signaling pathway	15/93	0.115818	0.713438	0	0	1.39223	3.00129	MAP2K3;MAP3K3;PLA2G4B;ITPR1;ITPR2;CACNA1F;ELK1;MAPK12;CDC42;PLCB3;MAPK1;PLCB1;CALM1;CAMK2G;MAPK3
AMPK signaling pathway	18/120	0.151651	0.718594	0	0	1.29478	2.44217	SREBF1;CPT1A;STRADB;PPP2R2A;TSC1;PPP2R3B;PPP2R5C;HMGCR;ADIPOR1;ACACB;MTOR;IGF1R;RPTOR;CCNA2;PPP2CA;PPP2R3C;AKT2;PPP2R2D
Endometrial cancer	10/58	0.128576	0.720023	0	0	1.48825	3.05276	GSK3B;APC;AKT2;PTEN;CTNNA1;MAPK1;MLH1;ELK1;TP53;MAPK3
Nicotinate and nicotinamide metabolism	6/30	0.126324	0.720515	0	0	1.72637	3.5717	NT5C3B;NNT;NMRK1;QPRT;NT5C2;NADK
p53 signaling pathway	12/72	0.124188	0.721698	0	0	1.43864	3.00094	CDK6;APAF1;CHEK2;SESN1;CCNG2;SERPINE1;CHEK1;PTEN;ATM;BID;GTSE1;TP53
Long-term depression	10/60	0.151287	0.728067	0	0	1.43864	2.71699	PPP2CA;PLCB3;PLA2G4B;GNA12;ITPR1;ITPR2;MAPK1;PLCB1;IGF1R;MAPK3
Propanoate metabolism	6/32	0.158903	0.730481	0	0	1.61847	2.97711	HADHA;ACSS2;PCCA;ACSS1;ACACB;DLD
C-type lectin receptor signaling pathway	16/104	0.144963	0.731943	0	0	1.32798	2.56469	PLK3;KSR1;STAT2;ITPR1;NFATC3;ITPR2;MAPK12;IKBKB;PPP3CC;AKT2;NLRP3;MAPK1;CLEC4E;CALM1;IKBKE;MAPK3
Glycerophospholipid metabolism	15/97	0.14981	0.732402	0	0	1.33482	2.53401	AGPAT5;DGKD;CHKB;PNPLA7;DGKA;PLA2G4B;MBOAT7;LPCAT1;DGKZ;PLD3;PGS1;LPCAT3;PNPLA6;CDIPT;CDS2
Long-term potentiation	11/67	0.147693	0.7337	0	0	1.41717	2.71051	RPS6KA3;PLCB3;CREBBP;PPP3CC;ITPR1;ITPR2;MAPK1;PLCB1;CALM1;CAMK2G;MAPK3
Neurotrophin signaling pathway	18/119	0.143563	0.736958	0	0	1.30566	2.53426	GSK3B;MAP3K3;SHC1;FRS2;MAPK12;IKBKB;CDC42;RPS6KA3;RPS6KA5;AKT2;MAPK1;PLCG1;CALM1;TP53;CAMK2G;MAP2K5;NFKBIB;MAPK3
Pyruvate metabolism	7/39	0.158883	0.741452	0	0	1.54931	2.85009	GRHPR;ACSS2;ME3;ACYP2;ACSS1;ACACB;DLD
Insulin signaling pathway	20/137	0.164699	0.745989	0	0	1.26012	2.27281	GSK3B;SREBF1;SHC1;INPPL1;TSC1;PYGM;PYGL;ELK1;ACACB;MTOR;IKBKB;RPTOR;PHKG1;AKT2;PPP1R3E;MKNK2;FLOT1;MAPK1;CALM1;MAPK3
Proteasome	8/45	0.143521	0.749229	0	0	1.53455	2.97898	PSMD14;PSMA1;PSMA2;PSMB1;PSMC2;PSME4;PSMD1;PSMA7
Pantothenate and CoA biosynthesis	4/19	0.17052	0.750287	0	0	1.81723	3.21451	PANK4;PANK2;PPCDC;COASY
Choline metabolism in cancer	15/99	0.168626	0.752707	0	0	1.30786	2.32808	DGKD;CHKB;SLC44A1;SLC44A2;DGKA;PLA2G4B;PDGFA;TSC1;DGKZ;MTOR;AKT2;MAPK1;PLCG1;RALGDS;MAPK3
Herpes simplex virus 1 infection	65/492	0.142739	0.757993	0	0	1.14039	2.22003	ZNF254;ZNF250;ZNF43;IKBKB;TBK1;ZFP30;ZNF529;AKT2;ZNF649;ZNF84;ZNF846;ZNF569;ZNF568;ZNF248;IKBKE;ZNF763;ZIK1;ZNF684;ZNF200;ZNF562;ZNF320;IFNAR2;PDIA3;ZNF19;APAF1;DDX58;ZNF160;ZNF10;TSC1;HLA-A;IRF3;TRAF3;SRSF3;SRSF4;ZNF780B;SRSF5;ITGA5;SRSF7;TP53;ZNF473;SP100;HKR1;ZNF195;SRSF1;ZNF3;NXF1;ZNF707;ZNF506;TNFRSF14;BID;ZNF268;ZNF585A;ZNF286A;EIF2B4;EIF2B3;ZNF383;EIF2B2;STAT2;EIF2AK2;EIF2AK4;MTOR;ZNF814;Z…
Ribosome biogenesis in eukaryotes	15/101	0.188587	0.784931	0	0	1.28196	2.13856	NVL;RPP30;RPP40;FCF1;PWP2;REXO2;UTP18;RCL1;NXF1;TBL3;XPO1;TCOF1;XRN2;GAR1;RIOK1
Colorectal cancer	13/86	0.192339	0.789873	0	0	1.30481	2.15098	GSK3B;SMAD4;MLH1;MTOR;BCL2L11;APC;AKT2;BIRC5;MAPK1;TP53;RALGDS;APPL1;MAPK3
IL-17 signaling pathway	14/93	0.185234	0.792391	0	0	1.29942	2.19099	GSK3B;USP25;HSP90AA1;HSP90AB1;SRSF1;IL17RE;MAPK12;IKBKB;TBK1;TRAF3;MAPK1;ANAPC5;IKBKE;MAPK3
FoxO signaling pathway	19/132	0.188275	0.794367	0	0	1.24246	2.07473	PLK4;PLK3;CREBBP;SMAD4;SETD7;FBXO25;AGAP2;PTEN;MAPK12;IGF1R;IKBKB;BCL2L11;AKT2;CCNG2;MAPK1;ATM;SKP2;SGK1;MAPK3
Thyroid hormone signaling pathway	17/116	0.184196	0.799046	0	0	1.26501	2.14009	GSK3B;CREBBP;NCOA3;ATP1B3;MED12L;MTOR;MED17;PLCB3;MED24;NCOR1;RXRA;AKT2;MAPK1;PLCG1;PLCB1;TP53;MAPK3
RNA degradation	12/79	0.199805	0.809738	0	0	1.31117	2.11152	EDC4;HSPA9;DDX6;CNOT1;XRN2;EXOSC8;DHX36;CNOT3;PARN;CNOT10;SKIV2L;PABPC1L
Glucagon signaling pathway	15/103	0.209625	0.838502	0	0	1.25707	1.96408	CPT1A;CREBBP;ITPR1;ITPR2;PYGM;PYGL;ACACB;PLCB3;PPP4C;PPP3CC;PHKG1;AKT2;CALM1;PLCB1;CAMK2G
Butanoate metabolism	5/28	0.218218	0.861681	0	0	1.5414	2.34642	HMGCL;HADHA;BDH2;ACSM3;BDH1
Leukocyte transendothelial migration	16/112	0.222292	0.866657	0	0	1.23312	1.85432	VASP;ITGB1;VAV3;ITGA4;ROCK1;CTNND1;ITGB2;ITGAL;MAPK12;ICAM1;CDC42;CLDN15;CTNNA1;PLCG1;EZR;SIPA1
Hepatocellular carcinoma	23/168	0.226786	0.873127	0	0	1.18174	1.75341	RB1;GSK3B;NQO1;SMAD4;PBRM1;PHF10;SHC1;GSTO1;MGST3;FZD6;PTEN;ELK1;SMARCA2;MTOR;IGF1R;CDK6;APC;AKT2;MAPK1;PLCG1;BRD7;TP53;MAPK3
Prostate cancer	14/97	0.229847	0.873987	0	0	1.24583	1.8318	RB1;GSK3B;CREBBP;HSP90AA1;HSP90AB1;PTEN;PDGFA;MTOR;IGF1R;IKBKB;AKT2;MAPK1;TP53;MAPK3
Riboflavin metabolism	2/8	0.235114	0.883111	0	0	2.15796	3.12405	ACP2;ACP1
TGF-beta signaling pathway	13/90	0.239793	0.889833	0	0	1.24682	1.78044	CREBBP;SMAD4;ROCK1;SMURF2;CUL1;LTBP1;PPP2CA;RBL1;ZFYVE16;MAPK1;E2F4;NEO1;MAPK3
Pancreatic cancer	11/75	0.247889	0.908926	0	0	1.266	1.76579	RB1;IKBKB;CDC42;SMAD4;CDK6;AKT2;MAPK1;TP53;RALGDS;MTOR;MAPK3
Primary immunodeficiency	6/37	0.253209	0.917509	0	0	1.39976	1.92263	DCLRE1C;PTPRC;LCK;RFX5;IL2RG;CD3E
HIF-1 signaling pathway	14/100	0.265912	0.952336	0	0	1.20846	1.60071	CREBBP;SERPINE1;CUL2;MTOR;IGF1R;AKT2;MKNK2;MAPK1;PLCG1;LTBR;GAPDH;CAMK2G;PDK1;MAPK3
Protein export	4/23	0.273057	0.966684	0	0	1.50119	1.94866	SEC61A2;SRP19;IMMP1L;SRP54
Circadian rhythm	5/31	0.286599	1	0	0	1.39223	1.73983	PER1;CUL1;CRY1;RORA;BTRC
RIG-I-like receptor signaling pathway	10/70	0.289548	1	0	0	1.23312	1.52837	IKBKB;TBK1;IRF3;DDX58;TRAF3;TRIM25;IKBKE;MAPK12;ATG5;NFKBIB
Vitamin digestion and absorption	4/24	0.300254	1	0	0	1.43864	1.73087	SLC5A6;SCARB1;ABCC1;LMBRD1
B cell receptor signaling pathway	10/71	0.305064	1	0	0	1.21575	1.44339	IKBKB;VAV3;GSK3B;PPP3CC;AKT2;INPPL1;NFATC3;MAPK1;MAPK3;NFKBIB
Ferroptosis	6/40	0.315768	1	0	0	1.29478	1.49255	LPCAT3;SLC11A2;VDAC3;ATG7;TP53;ATG5
Amino sugar and nucleotide sugar metabolism	7/48	0.31881	1	0	0	1.25881	1.43902	GMPPB;GALT;UXS1;GMPPA;PGM2;CYB5RL;NANS
Adrenergic signaling in cardiomyocytes	19/145	0.3194	1	0	0	1.13107	1.2909	CREM;PPP2R2A;ATP1B3;PPP2R3B;PPP2R5C;CACNA1F;PIK3R6;MAPK12;PPP2CA;PLCB3;RPS6KA5;PPP2R3C;AKT2;PPP2R2D;MAPK1;CALM1;PLCB1;CAMK2G;MAPK3
Adherens junction	10/72	0.320774	1	0	0	1.19887	1.36313	CDC42;CREBBP;SMAD4;PARD3;CTNND1;CTNNA1;MAPK1;ACP1;IGF1R;MAPK3
Tuberculosis	23/179	0.330759	1	0	0	1.10912	1.22709	HSPA9;PLK3;CREBBP;APAF1;KSR1;NFYB;ITGB2;MAPK12;CYP27B1;PPP3CC;AKT2;LAMP2;RFX5;ATP6V0A2;ITGAX;ATP6V1H;MAPK1;CLEC4E;CALM1;BID;CAMK2G;RAB7A;MAPK3
Fructose and mannose metabolism	5/33	0.334143	1	0	0	1.30786	1.43365	GMPPB;ENOSF1;GMPPA;SORD;KHK
Bladder cancer	6/41	0.337167	1	0	0	1.2632	1.37332	RB1;RPS6KA5;DAPK1;MAPK1;TP53;MAPK3
Mitophagy	9/65	0.337763	1	0	0	1.19518	1.29726	BECN1;BCL2L13;USP15;TBK1;RHOT1;TP53;OPTN;RAB7A;ATG5
Aldosterone synthesis and secretion	13/98	0.345528	1	0	0	1.14504	1.21681	ATF1;SCARB1;ITPR1;ITPR2;ATP1B3;CACNA1F;NR4A2;PLCB3;PRKD3;CALM1;DAGLB;PLCB1;CAMK2G
Non-small cell lung cancer	9/66	0.354774	1	0	0	1.17707	1.21977	RB1;STAT5A;RXRA;CDK6;AKT2;MAPK1;PLCG1;TP53;MAPK3
Porphyrin and chlorophyll metabolism	6/42	0.358717	1	0	0	1.23312	1.26422	ALAS1;MMAB;UROS;HMBS;PPOX;GUSB
Insulin resistance	14/108	0.36974	1	0	0	1.11894	1.1133	GSK3B;SREBF1;CPT1A;PTEN;PYGM;PYGL;ACACB;MTOR;IKBKB;RPS6KA3;AKT2;PPP1R3E;SLC27A3;OGT
Ubiquinone and other terpenoid-quinone biosynthesis	2/11	0.369913	1	0	0	1.56943	1.56078	NQO1;COQ5
VEGF signaling pathway	8/59	0.374923	1	0	0	1.17042	1.14822	CDC42;PPP3CC;AKT2;PLA2G4B;MAPK1;PLCG1;MAPK12;MAPK3
Viral myocarditis	8/59	0.374923	1	0	0	1.17042	1.14822	CD86;ITGB2;HLA-A;ITGAL;BID;CD55;ICAM1;EIF4G1
Amyotrophic lateral sclerosis (ALS)	7/51	0.377793	1	0	0	1.18476	1.15326	MAP2K3;PPP3CC;APAF1;DERL1;BID;TP53;MAPK12
Glycosaminoglycan degradation	3/19	0.380719	1	0	0	1.36292	1.31617	NAGLU;IDUA;GUSB
Chronic myeloid leukemia	10/76	0.384979	1	0	0	1.13577	1.08417	RB1;IKBKB;STAT5A;SMAD4;CDK6;SHC1;AKT2;MAPK1;TP53;MAPK3
Apoptosis	18/143	0.391358	1	0	0	1.08653	1.01931	BECN1;DFFA;PARP3;APAF1;ITPR1;ITPR2;TUBA4A;IKBKB;BCL2L11;AKT2;BIRC5;MAPK1;ATM;BIRC6;BID;TP53;CTSC;MAPK3
Small cell lung cancer	12/93	0.391816	1	0	0	1.11379	1.04358	RB1;ITGB1;IKBKB;ZBTB17;RXRA;CDK6;APAF1;TRAF3;AKT2;PTEN;SKP2;TP53
Longevity regulating pathway	13/102	0.40151	1	0	0	1.10014	1.0039	EHMT2;EHMT1;TSC1;ADIPOR1;MTOR;IGF1R;RPTOR;AKT2;SESN1;RB1CC1;TP53;ATG5;APPL1
Fatty acid degradation	6/44	0.401986	1	0	0	1.17707	1.07271	HADHB;HADHA;CPT1A;ACOX1;ECI2;ADH5
Salmonella infection	11/86	0.411846	1	0	0	1.10407	0.979429	CDC42;DYNC1LI1;DYNC1I2;ROCK1;MAPK1;PKN2;KLC1;RILP;MAPK12;RAB7A;MAPK3
One carbon pool by folate	3/20	0.413517	1	0	0	1.29478	1.14336	DHFR;SHMT2;GART
Chagas disease (American trypanosomiasis)	13/103	0.415627	1	0	0	1.08946	0.956509	SERPINE1;PPP2R2A;CD3E;MAPK12;IKBKB;PPP2CA;PLCB3;GNA15;AKT2;PPP2R2D;MAPK1;PLCB1;MAPK3
Alzheimer disease	21/171	0.422756	1	0	0	1.06005	0.912662	GSK3B;NDUFA8;NDUFB8;APAF1;NDUFA3;ITPR1;ITPR2;SDHC;CACNA1F;COX7C;PLCB3;APH1B;PPP3CC;NDUFS4;MAPK1;NDUFV2;CALM1;PLCB1;BID;GAPDH;MAPK3
Rap1 signaling pathway	25/206	0.43414	1	0	0	1.04755	0.874068	ITGB1;CTNND1;ITGB2;PDGFA;SIPA1L2;ITGAL;IGF1R;CDC42;SIPA1L1;AKT2;KRIT1;MAPK1;PLCG1;RALGDS;MAPK3;VASP;MAP2K3;MAPK12;APBB1IP;PLCB3;PRKD3;PARD3;CALM1;PLCB1;SIPA1
Phospholipase D signaling pathway	18/148	0.450792	1	0	0	1.04982	0.836443	AGPAT5;DGKD;SHC1;DGKA;PLA2G4B;PDGFA;TSC1;DGKZ;PIK3R6;MTOR;PLCB3;AKT2;GNA12;MAPK1;PLCG1;PLCB1;RALGDS;MAPK3
Dopaminergic synapse	16/131	0.451006	1	0	0	1.05427	0.839489	GSK3B;ITPR1;ITPR2;PPP2R2A;PPP2R3B;PPP2R5C;MAPK12;PPP2CA;PLCB3;PPP3CC;PPP2R3C;AKT2;PPP2R2D;CALM1;PLCB1;CAMK2G
Fatty acid biosynthesis	2/13	0.454606	1	0	0	1.32798	1.04688	OXSM;ACACB
Melanoma	9/72	0.457858	1	0	0	1.07898	0.842896	RB1;CDK6;AKT2;PTEN;PDGFA;MAPK1;TP53;IGF1R;MAPK3
D-Glutamine and D-glutamate metabolism	1/5	0.459741	1	0	0	1.72637	1.34155	GLS
Central carbon metabolism in cancer	8/65	0.484633	1	0	0	1.06238	0.76955	AKT2;PTEN;MAPK1;TP53;MTOR;GLS;PDK1;MAPK3
Notch signaling pathway	6/48	0.487427	1	0	0	1.07898	0.775372	LFNG;NCOR2;CREBBP;APH1B;DTX4;RBPJ
Transcriptional misregulation in cancer	22/186	0.492801	1	0	0	1.02097	0.722491	CD86;ATF1;ZBTB17;TAF15;CCNT1;KMT2A;FUS;DOT1L;JMJD1C;PDGFA;MLLT1;SUPT3H;IGF1R;ETV6;NCOR1;RXRA;EWSR1;REL;ATM;TCF3;TP53;KDM6A
AGE-RAGE signaling pathway in diabetic complications	12/100	0.494585	1	0	0	1.03582	0.729256	STAT5A;CDC42;SMAD4;PLCB3;AKT2;SERPINE1;MAPK1;PLCG1;PLCB1;MAPK12;ICAM1;MAPK3
Glycine, serine and threonine metabolism	5/40	0.500512	1	0	0	1.07898	0.746789	GRHPR;ALAS1;SHMT2;DLD;GNMT
Renin-angiotensin system	3/23	0.507853	1	0	0	1.12589	0.762865	CTSA;PREP;PRCP
Vitamin B6 metabolism	1/6	0.522346	1	0	0	1.43864	0.934291	PNPO
Pertussis	9/76	0.525214	1	0	0	1.02219	0.658241	ITGB1;IRF3;ITGB2;NLRP3;MAPK1;ITGA5;CALM1;MAPK12;MAPK3
ErbB signaling pathway	10/85	0.529688	1	0	0	1.01551	0.645324	STAT5A;GSK3B;SHC1;AKT2;MAPK1;PLCG1;ELK1;CAMK2G;MTOR;MAPK3
Human cytomegalovirus infection	26/225	0.53685	1	0	0	0.997458	0.620455	RB1;GSK3B;ROCK1;ITPR1;ITPR2;ELK1;IKBKB;TBK1;PPP3CC;AKT2;GNA12;MAPK1;BID;MAPK3;PDIA3;NFATC3;TSC1;HLA-A;MAPK12;MTOR;PLCB3;CDK6;IRF3;CALM1;PLCB1;TP53
Fc epsilon RI signaling pathway	8/68	0.537752	1	0	0	1.01551	0.629982	VAV3;MAP2K3;AKT2;PLA2G4B;MAPK1;PLCG1;MAPK12;MAPK3
Toll-like receptor signaling pathway	12/104	0.551642	1	0	0	0.995983	0.592466	CD86;MAP2K3;IFNAR2;IKBKB;TBK1;IRF3;TRAF3;AKT2;MAPK1;IKBKE;MAPK12;MAPK3
Adipocytokine signaling pathway	8/69	0.554991	1	0	0	1.00079	0.589271	IKBKB;CPT1A;RXRA;AKT2;ADIPOR1;ACACB;MTOR;NFKBIB
Natural killer cell mediated cytotoxicity	15/131	0.560082	1	0	0	0.98838	0.572937	IFNAR2;VAV3;SHC1;ITGB2;HLA-A;ITGAL;ICAM1;TYROBP;PPP3CC;LCK;MAPK1;KLRD1;PLCG1;BID;MAPK3
SNARE interactions in vesicular transport	4/34	0.566171	1	0	0	1.01551	0.577683	VAMP7;STX16;GOSR2;STX2
Prolactin signaling pathway	8/70	0.571954	1	0	0	0.986497	0.551152	STAT5A;GSK3B;GALT;SHC1;AKT2;MAPK1;MAPK12;MAPK3
Platelet activation	14/124	0.582898	1	0	0	0.974564	0.526014	VASP;ITGB1;ROCK1;PLA2G4B;ITPR1;ITPR2;PIK3R6;MAPK12;APBB1IP;PLCB3;AKT2;MAPK1;PLCB1;MAPK3
Folate biosynthesis	3/26	0.593606	1	0	0	0.995983	0.519445	DHFR;MOCS2;AKR1C3
Selenocompound metabolism	2/17	0.602174	1	0	0	1.01551	0.515077	MARS;SCLY
Cytosolic DNA-sensing pathway	7/63	0.605498	1	0	0	0.959095	0.481181	IKBKB;TBK1;IRF3;DDX58;POLR2H;IKBKE;NFKBIB
Drug metabolism	12/108	0.606179	1	0	0	0.959095	0.480104	NME6;GSTO1;NME7;MGST3;TK2;NME4;UPP1;GUSB;UMPS;ADH5;ITPA;UCKL1
ABC transporters	5/45	0.608915	1	0	0	0.959095	0.475785	ABCD4;ABCA2;ABCC1;ABCD3;ABCA7
Basal transcription factors	5/45	0.608915	1	0	0	0.959095	0.475785	CDK7;TAF15;GTF2B;TAF11;GTF2E2
Oxytocin signaling pathway	17/153	0.610676	1	0	0	0.959095	0.473014	ROCK1;NPR2;PLA2G4B;ITPR1;NFATC3;ITPR2;CACNA1F;ELK1;PIK3R6;PLCB3;PPP3CC;MAPK1;CALM1;PLCB1;CAMK2G;MAP2K5;MAPK3
Necroptosis	18/162	0.611727	1	0	0	0.959095	0.471365	IFNAR2;STAT5A;HSP90AA1;PARP3;HSP90AB1;H2AFY;FAF1;PLA2G4B;STAT2;EIF2AK2;PYGM;PYGL;VDAC3;NLRP3;DNM1L;BID;CAMK2G;PPID
Inflammatory mediator regulation of TRP channels	11/100	0.619273	1	0	0	0.949504	0.455011	MAP2K3;PLCB3;PLA2G4B;ITPR1;TRPV2;ITPR2;PLCG1;CALM1;PLCB1;CAMK2G;MAPK12
Fc gamma R-mediated phagocytosis	10/91	0.619472	1	0	0	0.948555	0.454251	VAV3;CDC42;VASP;PTPRC;AKT2;PLA2G4B;INPPL1;MAPK1;PLCG1;MAPK3
Axon guidance	20/181	0.624086	1	0	0	0.953796	0.449683	ITGB1;SEMA6C;GSK3B;ROCK1;NFATC3;SSH2;SSH1;CDC42;ABLIM1;PPP3CC;PARD3;SLIT1;MAPK1;PLXNB1;PLCG1;SRGAP3;NEO1;CAMK2G;PDK1;MAPK3
Legionellosis	6/55	0.625048	1	0	0	0.941657	0.44251	CLK1;RAB1A;BCL2L13;APAF1;SAR1A;ITGB2
Sulfur relay system	1/8	0.626639	1	0	0	1.07898	0.504299	MOCS2
Endocytosis	27/244	0.630562	1	0	0	0.955164	0.440468	VPS29;WIPF1;AGAP2;VPS26A;ARRB1;IL2RG;AP2A2;IGF1R;CDC42;ZFYVE27;GRK4;PSD4;RAB11FIP3;SNX5;SNX6;GIT2;SMURF2;ARAP2;HLA-A;EPS15L1;ARAP1;EPN1;ZFYVE16;RABEP1;PARD3;VPS28;RAB7A
Apelin signaling pathway	15/137	0.632051	1	0	0	0.945093	0.433595	HDAC4;BECN1;HDAC5;SMAD4;SERPINE1;ITPR1;ITPR2;PIK3R6;MTOR;PLCB3;AKT2;MAPK1;CALM1;PLCB1;MAPK3
Cushing syndrome	17/155	0.632636	1	0	0	0.946719	0.433464	RB1;SCARB1;KMT2D;GSK3B;KMT2A;FZD6;ITPR1;ITPR2;ASH2L;CACNA1F;PLCB3;CDK6;APC;MAPK1;PLCB1;CAMK2G;MAPK3
Other glycan degradation	2/18	0.634004	1	0	0	0.959095	0.437059	MANBA;MAN2C1
Aldosterone-regulated sodium reabsorption	4/37	0.634975	1	0	0	0.933173	0.423818	MAPK1;ATP1B3;SGK1;MAPK3
Thyroid cancer	4/37	0.634975	1	0	0	0.933173	0.423818	RXRA;MAPK1;TP53;MAPK3
Leishmaniasis	8/74	0.636625	1	0	0	0.933173	0.421397	ITGB1;ITGA4;ITGB2;MAPK1;ELK1;MAPK12;MAPK3;NFKBIB
Purine metabolism	14/129	0.643745	1	0	0	0.93679	0.412611	ENTPD4;NPR2;ENTPD6;ADK;NUDT2;NME4;NT5C2;NUDT9;NT5C3B;NME6;NME7;PGM2;GART;ITPA
Gastric acid secretion	8/75	0.651911	1	0	0	0.920731	0.393933	PLCB3;ITPR1;ITPR2;ATP1B3;EZR;PLCB1;CALM1;CAMK2G
cGMP-PKG signaling pathway	18/166	0.653835	1	0	0	0.935984	0.3977	VASP;ROCK1;NPR2;ITPR1;NFATC3;ITPR2;ATP1B3;CACNA1F;PIK3R6;PLCB3;PPP3CC;AKT2;GNA12;VDAC3;MAPK1;CALM1;PLCB1;MAPK3
Retrograde endocannabinoid signaling	16/148	0.654263	1	0	0	0.933173	0.395895	NDUFA8;FAAH;NDUFB8;NDUFA3;ITPR1;ITPR2;CACNA1F;MAPK12;PLCB3;NDUFS4;NAPEPLD;MAPK1;NDUFV2;DAGLB;PLCB1;MAPK3
Acute myeloid leukemia	7/66	0.655422	1	0	0	0.915499	0.386776	IKBKB;STAT5A;AKT2;MAPK1;PIM2;MTOR;MAPK3
Non-alcoholic fatty liver disease (NAFLD)	16/149	0.664987	1	0	0	0.92691	0.378168	GSK3B;SREBF1;NDUFA8;NDUFB8;NDUFA3;SDHC;ADIPOR1;COX7C;IKBKB;CDC42;BCL2L11;RXRA;AKT2;NDUFS4;NDUFV2;BID
Sulfur metabolism	1/9	0.66991	1	0	0	0.959095	0.384224	SUOX
NF-kappa B signaling pathway	10/95	0.674134	1	0	0	0.908616	0.358291	IKBKB;DDX58;TRAF3;LCK;TRIM25;ATM;ERC1;PLCG1;LTBR;ICAM1
Antigen processing and presentation	8/77	0.681331	1	0	0	0.896816	0.344114	PDIA3;HSP90AA1;HSP90AB1;HSPA4;NFYB;RFX5;KLRD1;HLA-A
Hippo signaling pathway	17/160	0.684747	1	0	0	0.917134	0.347324	GSK3B;SMAD4;SERPINE1;FZD6;ITGB2;PPP2R2A;MOB1B;LATS1;PPP2CA;APC;RASSF4;PARD3;PPP2R2D;CTNNA1;BIRC5;BTRC;LLGL2
Glycolysis / Gluconeogenesis	7/68	0.686504	1	0	0	0.888573	0.334231	MINPP1;ACSS2;PGM2;ACSS1;DLD;GAPDH;ADH5
Parathyroid hormone synthesis, secretion and action	11/106	0.696158	1	0	0	0.895758	0.324424	NR4A2;CYP27B1;PLCB3;RXRA;GNA12;ITPR1;ITPR2;MAPK1;ARRB1;PLCB1;MAPK3
Hematopoietic cell lineage	10/97	0.699645	1	0	0	0.889882	0.317849	CSF3R;IL4R;ITGA4;FLT3LG;CD1D;ITGA5;CD3E;IL9R;CD44;CD55
Pathways in cancer	58/530	0.700036	1	0	0	0.944618	0.336873	RB1;ITGB1;GSK3B;CSF3R;HSP90AB1;HHIP;PTEN;ELK1;IGF1R;IKBKB;RPS6KA5;AKT2;PIM2;SKP2;APPL1;IFNAR2;HSP90AA1;IL4R;APAF1;DAPK1;GSTO1;IL15;NCOA3;FLT3LG;PLCB3;TRAF3;BIRC5;PLCB1;TP53;ROCK1;MGST3;CUL2;CUL1;PDGFA;IL2RG;CDC42;BCL2L11;RXRA;GNA12;CTNNA1;MAPK1;PLCG1;BID;RALGDS;CAMK2G;MAPK3;STAT5A;ZBTB17;NQO1;CREBBP;SMAD4;STAT2;FZD6;MLH1;MTOR;CDK6;APC;CALM1
Renin secretion	7/69	0.701352	1	0	0	0.875695	0.310649	PLCB3;PPP3CC;ITPR1;ITPR2;PLCB1;CACNA1F;CALM1
Gap junction	9/88	0.703904	1	0	0	0.882803	0.309964	PLCB3;ITPR1;ITPR2;PDGFA;MAPK1;PLCB1;TUBA4A;MAP2K5;MAPK3
Galactose metabolism	3/31	0.71329	1	0	0	0.83534	0.282234	GALT;B4GALT1;PGM2
RNA polymerase	3/31	0.71329	1	0	0	0.83534	0.282234	POLR1B;POLR2G;POLR2H
Osteoclast differentiation	13/127	0.723406	1	0	0	0.883575	0.286089	IFNAR2;LILRA6;STAT2;LILRB2;MAPK12;IKBKB;TYROBP;PPP3CC;LCK;AKT2;SIRPA;MAPK1;MAPK3
TNF signaling pathway	11/110	0.741744	1	0	0	0.863185	0.257877	MAP2K3;IKBKB;RPS6KA5;IL15;TRAF3;AKT2;MAPK1;DNM1L;MAPK12;ICAM1;MAPK3
Taurine and hypotaurine metabolism	1/11	0.741994	1	0	0	0.784714	0.23417	GGT1
MAPK signaling pathway	31/295	0.745715	1	0	0	0.907076	0.266147	PDGFA;ARRB1;CACNA1F;ELK1;IGF1R;IKBKB;CDC42;RPS6KA3;RPS6KA5;PPP3CC;AKT2;MKNK2;GNA12;MAPK1;MAP4K3;MAP2K5;MAP4K4;MAPK3;MAP4K1;MAP2K3;MAP3K3;PLA2G4B;NFATC3;FLT3LG;MAPK12;PPM1A;RASA2;NF1;MAPKAPK5;TP53;MAP3K12
Glycosaminoglycan biosynthesis	5/53	0.750376	1	0	0	0.814326	0.233859	B4GALT3;B4GALT1;EXTL3;B4GALT4;ST3GAL3
Regulation of actin cytoskeleton	22/214	0.755929	1	0	0	0.887387	0.248298	CYFIP2;VAV3;ITGB1;ITGA4;ROCK1;ITGB2;PDGFA;ITGAE;SSH2;ITGAL;SSH1;CDC42;ABI2;APC;SPATA13;GNA12;ITGAX;MAPK1;ITGA5;EZR;ARHGEF7;MAPK3
Proximal tubule bicarbonate reclamation	2/23	0.763774	1	0	0	0.750596	0.202273	ATP1B3;GLS
Bacterial invasion of epithelial cells	7/74	0.768479	1	0	0	0.816526	0.215026	ITGB1;CDC42;SHC1;CTNNA1;ELMO2;ITGA5;CD2AP
Tight junction	17/170	0.775291	1	0	0	0.863185	0.219695	VASP;ITGB1;ROCK1;HSPA4;PPP2R2A;ARHGAP17;CD1D;TUBA4A;TJAP1;PPP2CA;CDC42;CLDN15;PARD3;PPP2R2D;EZR;LLGL2;RAB8B
Pathogenic Escherichia coli infection	5/55	0.779036	1	0	0	0.784714	0.195942	ITGB1;CDC42;ROCK1;EZR;TUBA4A
Cortisol synthesis and secretion	6/65	0.779074	1	0	0	0.796786	0.198917	SCARB1;PLCB3;ITPR1;ITPR2;PLCB1;CACNA1F
Alanine, aspartate and glutamate metabolism	3/35	0.787871	1	0	0	0.739873	0.176402	CAD;NIT2;GLS
Prion diseases	3/35	0.787871	1	0	0	0.739873	0.176402	MAPK1;ELK1;MAPK3
Glutathione metabolism	5/56	0.792383	1	0	0	0.770701	0.17935	GSTO1;MGST3;TXNDC12;OPLAH;GGT1
Type II diabetes mellitus	4/46	0.795837	1	0	0	0.750596	0.171407	IKBKB;MAPK1;MTOR;MAPK3
Proteoglycans in cancer	20/201	0.796894	1	0	0	0.858891	0.194997	ITGB1;ROCK1;FZD6;ITPR1;ITPR2;FRS2;ELK1;MAPK12;MTOR;IGF1R;CDC42;AKT2;MAPK1;PLCG1;ITGA5;EZR;TP53;CAMK2G;CD44;MAPK3
Retinol metabolism	6/67	0.803267	1	0	0	0.773002	0.16934	ALDH1A2;DHRS4L2;HSD17B6;ADH5;DHRS3;DHRS4
alpha-Linolenic acid metabolism	2/25	0.80332	1	0	0	0.690548	0.151232	ACOX1;PLA2G4B
Starch and sucrose metabolism	3/36	0.803782	1	0	0	0.719321	0.157119	PGM2;PYGM;PYGL
Circadian entrainment	9/97	0.805513	1	0	0	0.800893	0.173214	PER1;PLCB3;RPS6KA5;ITPR1;MAPK1;CALM1;PLCB1;CAMK2G;MAPK3
Huntington disease	19/193	0.806692	1	0	0	0.849768	0.182541	NDUFA8;CREBBP;NDUFB8;APAF1;NDUFA3;DNAH14;ITPR1;SDHC;COX7C;AP2A2;PLCB3;NDUFS4;VDAC3;POLR2G;POLR2H;PLCB1;NDUFV2;TP53;DNAL1
Epithelial cell signaling in Helicobacter pylori infection	6/68	0.814567	1	0	0	0.761634	0.15621	IKBKB;CDC42;ATP6V0A2;ATP6V1H;PLCG1;MAPK12
Breast cancer	14/147	0.818175	1	0	0	0.822081	0.164975	RB1;GSK3B;SHC1;NCOA3;FZD6;PTEN;MTOR;IGF1R;CDK6;APC;AKT2;MAPK1;TP53;MAPK3
African trypanosomiasis	3/37	0.818677	1	0	0	0.69988	0.140022	PLCB3;PLCB1;ICAM1
PI3K-Akt signaling pathway	36/354	0.821399	1	0	0	0.877815	0.172707	ITGB1;GSK3B;CSF3R;HSP90AB1;PTEN;PDGFA;PPP2R2A;IL2RG;PIK3R6;IGF1R;IKBKB;RPTOR;PPP2CA;RXRA;BCL2L11;PPP2R3C;AKT2;MYB;MLST8;MAPK1;MAPK3;IFNAR2;HSP90AA1;IL4R;ITGA4;FLT3LG;TSC1;PPP2R3B;PPP2R5C;MTOR;CDK6;PPP2R2D;PKN2;ITGA5;SGK1;TP53
Endocrine and other factor-regulated calcium reabsorption	4/48	0.822531	1	0	0	0.719321	0.140533	PLCB3;ATP1B3;PLCB1;AP2A2
Intestinal immune network for IgA production	4/48	0.822531	1	0	0	0.719321	0.140533	CD86;ITGA4;IL15;LTBR
Complement and coagulation cascades	7/79	0.823852	1	0	0	0.764848	0.1482	SERPINA1;SERPINE1;ITGB2;ITGAX;F13A1;CD46;CD55
Renal cell carcinoma	6/69	0.825349	1	0	0	0.750596	0.144076	CDC42;CREBBP;AKT2;CUL2;MAPK1;MAPK3
Wnt signaling pathway	15/158	0.828264	1	0	0	0.81948	0.154409	INVS;GSK3B;CREBBP;SMAD4;FZD6;CUL1;NFATC3;PORCN;PLCB3;PPP3CC;APC;BTRC;PLCB1;TP53;CAMK2G
Fluid shear stress and atherosclerosis	13/139	0.830647	1	0	0	0.807295	0.149794	NQO1;HSP90AA1;HSP90AB1;GSTO1;MGST3;PDGFA;MAPK12;ICAM1;IKBKB;AKT2;CALM1;TP53;MAP2K5
Gastric cancer	14/149	0.83287	1	0	0	0.811046	0.148322	RB1;GSK3B;SMAD4;SHC1;FZD6;MLH1;MTOR;RXRA;APC;AKT2;CTNNA1;MAPK1;TP53;MAPK3
Ovarian steroidogenesis	4/49	0.834758	1	0	0	0.704641	0.127268	SCARB1;PLA2G4B;AKR1C3;IGF1R
Biosynthesis of unsaturated fatty acids	2/27	0.836864	1	0	0	0.639396	0.113872	ACOX1;HSD17B4
Collecting duct acid secretion	2/27	0.836864	1	0	0	0.639396	0.113872	ATP6V0A2;SLC4A1
Fatty acid elongation	2/27	0.836864	1	0	0	0.639396	0.113872	HADHB;HADHA
Melanogenesis	9/101	0.841269	1	0	0	0.769175	0.132947	GSK3B;CREBBP;PLCB3;FZD6;MAPK1;CALM1;PLCB1;CAMK2G;MAPK3
Thiamine metabolism	1/15	0.842386	1	0	0	0.575457	0.0987003	ACP1
Cholesterol metabolism	4/50	0.846271	1	0	0	0.690548	0.115263	SCARB1;LIPC;NPC1;VDAC3
Vibrio cholerae infection	4/50	0.846271	1	0	0	0.690548	0.115263	SEC61A2;ATP6V0A2;ATP6V1H;PLCG1
Chemokine signaling pathway	18/190	0.848623	1	0	0	0.817754	0.134226	VAV3;GSK3B;ROCK1;SHC1;STAT2;ARRB1;PIK3R6;IKBKB;CDC42;PREX1;PLCB3;GRK4;AKT2;PARD3;MAPK1;PLCB1;NFKBIB;MAPK3
Cholinergic synapse	10/112	0.849317	1	0	0	0.770701	0.125873	PLCB3;AKT2;ITPR1;ITPR2;MAPK1;CACNA1F;PLCB1;CAMK2G;PIK3R6;MAPK3
Glycerolipid metabolism	5/61	0.84983	1	0	0	0.707529	0.115128	AGPAT5;DGKD;LIPC;DGKA;DGKZ
Vascular smooth muscle contraction	12/132	0.850662	1	0	0	0.784714	0.12692	PLCB3;ROCK1;NPR2;PLA2G4B;GNA12;ITPR1;ITPR2;MAPK1;CACNA1F;CALM1;PLCB1;MAPK3
Phototransduction	2/28	0.851617	1	0	0	0.616561	0.0990311	SLC24A1;CALM1
Phagosome	14/152	0.853211	1	0	0	0.795039	0.126212	ITGB1;SCARB1;DYNC1I2;ITGB2;HLA-A;TUBA4A;SEC61A2;DYNC1LI1;LAMP2;ATP6V0A2;ATP6V1H;ITGA5;RILP;RAB7A
Mineral absorption	4/51	0.8571	1	0	0	0.677008	0.104395	SLC11A2;MT1F;ATP1B3;SLC26A6
Ras signaling pathway	22/232	0.86804	1	0	0	0.818538	0.115837	BRAP;KSR1;SHC1;PLA2G4B;FLT3LG;PDGFA;ELK1;IGF1R;IKBKB;CDC42;TBK1;RASA4;AKT2;RASA2;REL;NF1;MAPK1;PLCG1;CALM1;RALGDS;EXOC2;MAPK3
Basal cell carcinoma	5/63	0.868793	1	0	0	0.685068	0.0963547	GSK3B;APC;HHIP;FZD6;TP53
Graft-versus-host disease	3/41	0.868959	1	0	0	0.631599	0.088714	CD86;KLRD1;HLA-A
Thyroid hormone synthesis	6/74	0.871943	1	0	0	0.69988	0.095905	PLCB3;ITPR1;ITPR2;ATP1B3;TTF1;PLCB1
Nitrogen metabolism	1/17	0.876815	1	0	0	0.507756	0.0667493	CA5B
Primary bile acid biosynthesis	1/17	0.876815	1	0	0	0.507756	0.0667493	HSD17B4
Citrate cycle (TCA cycle)	2/30	0.877527	1	0	0	0.575457	0.0751818	SDHC;DLD
Tryptophan metabolism	3/42	0.879429	1	0	0	0.616561	0.0792173	HADHA;AFMID;DLD
Estrogen signaling pathway	12/137	0.88246	1	0	0	0.756075	0.0945409	HSP90AA1;PLCB3;HSP90AB1;SHC1;AKT2;NCOA3;ITPR1;ITPR2;MAPK1;CALM1;PLCB1;MAPK3
Insulin secretion	7/86	0.883242	1	0	0	0.702593	0.0872311	PLCB3;RAB3A;ATP1B3;PLCB1;CACNA1F;KCNN4;CAMK2G
beta-Alanine metabolism	2/31	0.888854	1	0	0	0.556894	0.0656145	HADHA;CARNS1
Signaling pathways regulating pluripotency of stem cells	12/139	0.893543	1	0	0	0.745196	0.0838798	GSK3B;SMAD4;PCGF6;APC;AKT2;FZD6;MAPK1;TCF3;JARID2;MAPK12;IGF1R;MAPK3
Synaptic vesicle cycle	6/78	0.901298	1	0	0	0.663989	0.0690016	NAPA;RAB3A;ATP6V0A2;ATP6V1H;STX2;AP2A2
Salivary secretion	7/90	0.908943	1	0	0	0.671366	0.0640974	PLCB3;ITPR1;ITPR2;ATP1B3;PLCB1;KCNN4;CALM1
Rheumatoid arthritis	7/91	0.914554	1	0	0	0.663989	0.0593068	CD86;IL15;ITGB2;ATP6V0A2;ATP6V1H;ITGAL;ICAM1
Pentose and glucuronate interconversions	2/34	0.917253	1	0	0	0.507756	0.0438559	SORD;GUSB
Toxoplasmosis	9/113	0.918244	1	0	0	0.687493	0.0586375	MAP2K3;ITGB1;IKBKB;AKT2;MAPK1;PIK3R6;MAPK12;NFKBIB;MAPK3
Ether lipid metabolism	3/47	0.921361	1	0	0	0.550969	0.0451261	PLA2G4B;LPCAT1;PLD3
Sphingolipid metabolism	3/47	0.921361	1	0	0	0.550969	0.0451261	CERS5;SMPD4;SPTLC2
Glutamatergic synapse	9/114	0.922904	1	0	0	0.681462	0.054674	PLCB3;PPP3CC;PLA2G4B;ITPR1;ITPR2;MAPK1;PLCB1;GLS;MAPK3
ECM-receptor interaction	6/82	0.924671	1	0	0	0.631599	0.0494653	ITGB1;ITGA4;SV2A;ITGA5;CD47;CD44
Arginine biosynthesis	1/21	0.924759	1	0	0	0.411041	0.0321525	GLS
Arrhythmogenic right ventricular cardiomyopathy (ARVC)	5/72	0.930906	1	0	0	0.599434	0.0429174	ITGB1;ITGA4;CTNNA1;ITGA5;CACNA1F
Bile secretion	5/72	0.930906	1	0	0	0.599434	0.0429174	SCARB1;RXRA;AQP9;ATP1B3;HMGCR
Tyrosine metabolism	2/36	0.93223	1	0	0	0.479547	0.0336524	FAH;ADH5
Malaria	3/49	0.934028	1	0	0	0.528481	0.0360684	ITGB2;ITGAL;ICAM1
MicroRNAs in cancer	27/299	0.9349	1	0	0	0.779465	0.0524703	HDAC4;ROCK1;SHC1;PTEN;PDGFA;GLS;IKBKB;RPTOR;RPS6KA5;BCL2L11;MAPK1;BMF;PLCG1;CREBBP;ABCC1;KIF23;MTOR;FOXP1;CDK6;APC;ATM;ITGA5;EZR;TP53;RECK;CD44;EZH2
Thermogenesis	20/231	0.938237	1	0	0	0.747346	0.0476456	MAP2K3;NDUFA8;CPT1A;NDUFB8;NDUFA3;FRS2;TSC1;SDHC;SMARCA2;COX7C;MAPK12;MTOR;RPTOR;RPS6KA3;NDUFAF7;NDUFS4;MLST8;SLC25A20;NDUFV2;COX20
Histidine metabolism	1/23	0.941199	1	0	0	0.375298	0.0227435	CARNS1
Arachidonic acid metabolism	4/63	0.943761	1	0	0	0.548054	0.0317225	CYP2U1;PLA2G4B;AKR1C3;GGT1
Allograft rejection	2/38	0.944615	1	0	0	0.454308	0.0258856	CD86;HLA-A
JAK-STAT signaling pathway	13/162	0.94501	1	0	0	0.692679	0.0391777	IFNAR2;STAT5A;CREBBP;CSF3R;IL4R;IL15;STAT2;PDGFA;IL2RG;MTOR;AKT2;IL9R;PTPN2
Ribosome	12/153	0.949308	1	0	0	0.677008	0.0352194	RPL5;RPL10;RPS3;MRPS10;RPL35A;RPL22L1;RPS11;RPL17;RPL6;MRPL21;RPS24;RPS12
Cell adhesion molecules (CAMs)	11/145	0.956414	1	0	0	0.65483	0.0291822	CD86;ITGB1;PTPRC;ITGA4;CLDN15;CD6;ITGB2;HLA-A;ITGAL;NEO1;ICAM1
Serotonergic synapse	8/113	0.958375	1	0	0	0.611105	0.0259819	PLCB3;PLA2G4B;ITPR1;ITPR2;MAPK1;CACNA1F;PLCB1;MAPK3
Focal adhesion	16/199	0.959413	1	0	0	0.694018	0.0287557	VASP;VAV3;ITGB1;GSK3B;ITGA4;ROCK1;SHC1;PTEN;PDGFA;ELK1;IGF1R;CDC42;AKT2;MAPK1;ITGA5;MAPK3
Type I diabetes mellitus	2/43	0.96683	1	0	0	0.401481	0.0135429	CD86;HLA-A
Carbohydrate digestion and absorption	2/44	0.9701	1	0	0	0.392357	0.0119103	AKT2;ATP1B3
Vasopressin-regulated water reabsorption	2/44	0.9701	1	0	0	0.392357	0.0119103	DYNC1I2;DYNC1LI1
Relaxin signaling pathway	9/130	0.971677	1	0	0	0.59759	0.0171699	PLCB3;GNA15;SHC1;AKT2;MAPK1;ARRB1;PLCB1;MAPK12;MAPK3
Linoleic acid metabolism	1/29	0.971938	1	0	0	0.29765	0.00847221	PLA2G4B
Amoebiasis	6/96	0.972665	1	0	0	0.539491	0.0149523	PLCB3;GNA15;ITGB2;CD1D;PLCB1;RAB7A
Parkinson disease	10/142	0.973179	1	0	0	0.607877	0.0165262	NDUFA8;NDUFB8;UBA7;APAF1;NDUFA3;NDUFS4;VDAC3;SDHC;NDUFV2;COX7C
Pentose phosphate pathway	1/30	0.975193	1	0	0	0.287728	0.00722767	PGM2
Pancreatic secretion	6/98	0.97653	1	0	0	0.528481	0.0125513	PLCB3;ITPR1;ITPR2;ATP1B3;PLCB1;TPCN2
Oxidative phosphorylation	9/133	0.976806	1	0	0	0.58411	0.0137075	NDUFA8;NDUFB8;NDUFA3;NDUFS4;ATP6V0A2;ATP6V1H;SDHC;NDUFV2;COX7C
Mucin type O-glycan biosynthesis	1/31	0.978071	1	0	0	0.278447	0.00617399	GALNT6
Inflammatory bowel disease (IBD)	3/65	0.984991	1	0	0	0.398393	0.00602489	IL4R;RORA;IL2RG
Calcium signaling pathway	13/188	0.987906	1	0	0	0.596883	0.00726243	ITPR1;ITPR2;CACNA1F;TPCN2;PLCB3;GNA15;PPP3CC;PHKG1;VDAC3;PLCG1;CALM1;PLCB1;CAMK2G
Autoimmune thyroid disease	2/53	0.988433	1	0	0	0.32573	0.00378977	CD86;HLA-A
Amphetamine addiction	3/68	0.988766	1	0	0	0.380817	0.00430212	PPP3CC;CALM1;CAMK2G
Staphylococcus aureus infection	3/68	0.988766	1	0	0	0.380817	0.00430212	ITGB2;ITGAL;ICAM1
Hypertrophic cardiomyopathy (HCM)	4/85	0.991673	1	0	0	0.406205	0.0033967	ITGB1;ITGA4;ITGA5;CACNA1F
Fat digestion and absorption	1/41	0.993612	1	0	0	0.210533	0.00134926	SCARB1
Metabolism of xenobiotics by cytochrome P450	3/74	0.993764	1	0	0	0.34994	0.0021889	GSTO1;MGST3;ADH5
PPAR signaling pathway	3/74	0.993764	1	0	0	0.34994	0.0021889	CPT1A;RXRA;ACOX1
Steroid hormone biosynthesis	2/60	0.994561	1	0	0	0.287728	0.00156929	AKR1C3;HSD17B6
Protein digestion and absorption	4/90	0.994746	1	0	0	0.383638	0.00202092	COL7A1;ATP1B3;PRCP;KCNN4
Dilated cardiomyopathy (DCM)	4/91	0.995213	1	0	0	0.379422	0.00182068	ITGB1;ITGA4;ITGA5;CACNA1F
Alcoholism	11/180	0.995515	1	0	0	0.527502	0.00237136	HDAC4;HDAC5;HDAC10;H2AFY;SHC1;HDAC11;MAPK1;CALM1;HDAC8;HDAC6;MAPK3
Cardiac muscle contraction	3/78	0.995814	1	0	0	0.331994	0.00139273	ATP1B3;CACNA1F;COX7C
Cysteine and methionine metabolism	1/47	0.996952	1	0	0	0.183656	0.000560608	ENOPH1
Chemical carcinogenesis	3/82	0.997202	1	0	0	0.315799	0.000885002	GSTO1;MGST3;ADH5
cAMP signaling pathway	13/212	0.997511	1	0	0	0.529312	0.00131902	VAV3;CREBBP;VIPR2;ROCK1;HHIP;ATP1B3;CACNA1F;ACOX1;AKT2;MAPK1;CALM1;CAMK2G;MAPK3
Arginine and proline metabolism	1/49	0.997618	1	0	0	0.17616	0.000420054	CARNS1
Regulation of lipolysis in adipocytes	1/55	0.998863	1	0	0	0.156943	0.000178526	AKT2
GABAergic synapse	2/89	0.999781	1	0	0	0.193974	4.24999e-05	CACNA1F;GLS
Morphine addiction	2/91	0.999825	1	0	0	0.189711	3.32596e-05	GRK4;ARRB1
Systemic lupus erythematosus	3/133	0.999984	1	0	0	0.194703	3.16583e-06	CD86;SSB;H2AFY
Olfactory transduction	3/444	0.999995	1	0	0	0.0583233	3.19538e-07	ARRB1;CALM1;CAMK2G
Neuroactive ligand-receptor interaction	4/338	0.999995	1	0	0	0.102152	5.17227e-07	CHRNB1;VIPR2;CHRNA5;PARD3
Cytokine-cytokine receptor interaction	9/294	0.999995	1	0	0	0.26424	1.28911e-06	IFNAR2;CSF3R;IL4R;IL15;TNFRSF14;IL17RE;LTBR;IL2RG;IL9R

## Sheet: LR_HR_rMATS_GO_BP
Term	Overlap	P-value	Adjusted P-value	Old P-value	Old Adjusted P-value	Odds Ratio	Combined Score	Genes
cellular response to DNA damage stimulus (GO:0006974)	86/330	2.0733e-13	1.058e-09	0	0	2.24951	65.6958	SMARCAL1;MCM8;PHF1;FMR1;SETD7;SMC5;ASH2L;POLB;ENDOV;NIPBL;EXO1;CHEK2;CHEK1;MACROD1;TLK2;TOPBP1;IKBKE;POLH;VAV3;PARP3;RFC4;LIG1;NCOA6;RFC2;DDX11;USP3;USP45;MASTL;SPIDR;INIP;RAD51B;KIN;RAD51D;POLG2;IRF3;PAPD7;FANCD2;PSME4;TIPRL;CRY1;TP53;CACUL1;DTL;BLM;USP16;CUL5;UBA7;STXBP4;DOT1L;IGHMBP2;RNF8;PDS5A;CRIP1;RAD51AP1;BRIP1;BCL2L11;TP53TG1;POLD1;UBR5;RPS3;RAD54L;BID;MUTYH;MAPK3;PLK3;MBD4;UVRAG;NPM1;UBE…
mitotic cell cycle phase transition (GO:0044772)	60/222	1.85502e-10	3.15538e-07	0	0	2.33293	52.2763	RB1;CEP57;MCM8;CCP110;PPP2R2A;FOXM1;ACTR1A;CHEK2;RCC1;CEP250;PIM2;BTRC;NINL;CEP290;HSP90AA1;BORA;CEP135;MASTL;CKAP5;TUBA4A;LATS1;CCNA2;MELK;DBF4;MCM6;PLCB1;SFI1;CACUL1;OPTN;ANAPC1;SDCCAG8;DYNC1I2;CUL5;CUL3;CUL2;CUL1;PKMYT1;AURKA;ORC6;HAUS8;CEP70;CEP192;CEP76;LCMT1;CLASP2;PLK4;RANBP2;PLK3;UBE2C;NDE1;CUL4A;CDK7;WEE1;CDK6;CENPJ;ALMS1;PPP2R2D;TACC3;FGFR1OP;CUL4B
DNA repair (GO:0006281)	72/289	1.7473e-10	4.45823e-07	0	0	2.1505	48.3169	DCLRE1C;NUCKS1;POLB;ENDOV;NIPBL;EXO1;CHEK2;CHEK1;UIMC1;POLL;TOPBP1;POLH;PARP3;RFC4;LIG1;NCOA6;RFC2;USP3;USP45;INIP;RAD51B;NEIL3;RAD51D;POLG2;PAPD7;FANCD2;PSME4;DNA2;UBE2V1;TP53;EXD2;BLM;DOT1L;IGHMBP2;RNF8;BRCC3;PDS5A;RAD51AP1;ATXN3;BRIP1;MTA1;POLD1;RPS3;RAD54L;ASCC2;ASCC3;ORAOV1;PMS1;MUTYH;FANCI;MBD4;UVRAG;MGME1;NPM1;XRCC4;UBE2B;FANCM;ERCC6L2;ASCC1;HUWE1;FANCA;MND1;MLH1;APTX;MLH3;MTOR;TDP1;RAD17;…
regulation of translation (GO:0006417)	57/214	9.56246e-10	1.21993e-06	0	0	2.29914	47.7485	CYFIP2;EIF4A2;RPL5;NUP107;NUP188;FMR1;LTN1;RPS6KA3;SYNCRIP;IPO8;MTG1;OGFOD1;ENC1;NUP62;NUP214;NDC1;EIF5B;DAPK1;TSC1;PASK;NEMF;MAPKAPK5;NUP54;GAPDH;DDX6;RPL10;DHX9;NOLC1;MTIF2;MALSU1;NUP160;FXR2;TCOF1;NUP85;RPS3;POLR2G;POLR2H;PAIP1;RANBP2;EIF2B4;NPM1;EIF2B2;UPF3B;EIF2AK2;CNOT10;EIF2AK4;LARP4;MTOR;PUM2;DHFR;CNOT1;CAPRIN1;CNOT3;HNRNPD;EIF3E;TNRC6A;EIF4G1
G2/M transition of mitotic cell cycle (GO:0000086)	40/127	1.65707e-09	1.69121e-06	0	0	2.71869	54.9671	CEP57;DYNC1I2;CUL1;CCP110;PPP2R2A;PKMYT1;FOXM1;AURKA;ACTR1A;HAUS8;CHEK2;CEP70;CEP250;CEP192;BTRC;CEP76;CEP290;NINL;LCMT1;PLK4;PLK3;HSP90AA1;BORA;CEP135;NDE1;MASTL;CKAP5;TUBA4A;CCNA2;LATS1;CDK7;WEE1;MELK;CENPJ;ALMS1;FGFR1OP;PLCB1;SFI1;OPTN;SDCCAG8
cell cycle G2/M phase transition (GO:0044839)	40/128	2.14322e-09	1.82281e-06	0	0	2.69745	53.8438	CEP57;DYNC1I2;CUL1;CCP110;PPP2R2A;PKMYT1;FOXM1;AURKA;ACTR1A;HAUS8;CHEK2;CEP70;CEP250;CEP192;BTRC;CEP76;CEP290;NINL;LCMT1;PLK4;PLK3;HSP90AA1;BORA;CEP135;NDE1;MASTL;CKAP5;TUBA4A;CCNA2;LATS1;CDK7;WEE1;MELK;CENPJ;ALMS1;FGFR1OP;PLCB1;SFI1;OPTN;SDCCAG8
RNA processing (GO:0006396)	50/194	3.21592e-08	2.05135e-05	0	0	2.2247	38.3819	MAPKBP1;ZCCHC11;CELF2;HNRNPU;HNRNPR;TSEN2;USP39;CCAR2;SYNCRIP;RSRC1;SNRNP70;KHSRP;RBM6;SNRPN;SCAF11;THOC1;DDX54;PRPF4B;SRRM1;KIN;DDX19A;SFPQ;PRPF6;DDX39B;TEP1;HNRNPH1;PRPF3;XRN2;LUC7L3;SRSF4;SRSF5;SLU7;SRSF7;DHX9;SRSF1;PPP2CA;DHX30;DHX35;DHX36;SRPK2;IVNS1ABP;RBM39;NONO;HNRNPL;SMU1;NUDT21;HNRNPD;AGGF1;HNRNPC;DHX29
regulation of cell cycle G2/M phase transition (GO:1902749)	29/85	3.90411e-08	2.21363e-05	0	0	2.94498	50.2375	CEP57;DYNC1I2;CCP110;AURKA;ACTR1A;HAUS8;CEP70;CEP250;CEP192;CEP290;GTSE1;NINL;CEP76;PLK4;HSP90AA1;NPM1;CEP135;H2AFY;NDE1;CKAP5;TUBA4A;CDK6;CENPJ;ALMS1;NEK10;FGFR1OP;SFI1;TP53;SDCCAG8
microtubule cytoskeleton organization involved in mitosis (GO:1902850)	20/45	3.10723e-08	2.26517e-05	0	0	3.83638	66.3193	GPSM2;SUN2;STIL;BCCIP;TTK;KIF11;AURKC;AURKB;NDC80;AURKA;CENPE;KIF2A;ESPL1;KIF4A;NUF2;TBCE;NUSAP1;TACC3;RCC1;CLASP2
ciliary basal body-plasma membrane docking (GO:0097711)	31/97	7.54118e-08	3.84827e-05	0	0	2.75863	45.2424	CEP57;DYNC1I2;C2CD3;FBF1;CCP110;ACTR1A;HAUS8;TCTN3;TMEM67;CEP70;CEP250;NPHP4;CEP192;CEP97;CEP76;CEP290;NINL;PLK4;IQCB1;HSP90AA1;CEP135;NDE1;SCLT1;CKAP5;TUBA4A;CENPJ;ALMS1;FGFR1OP;SFI1;CEP89;SDCCAG8
regulation of G2/M transition of mitotic cell cycle (GO:0010389)	41/150	9.59955e-08	4.45332e-05	0	0	2.35937	38.125	CEP57;DYNC1I2;PSMD14;CUL1;CCP110;DBF4B;PSMA7;AURKA;PSMD9;ACTR1A;HAUS8;PSMD5;CEP70;PSMB1;PSMD1;CEP250;CEP192;CEP76;CEP290;NINL;BRD4;PLK4;HSP90AA1;CEP135;RCC2;NDE1;CKAP5;TUBA4A;RAD51B;RINT1;CDK6;PSMA1;PSMA2;CENPJ;PSME4;PSMC2;ALMS1;FGFR1OP;SFI1;DTL;SDCCAG8
positive regulation of mitotic cell cycle phase transition (GO:1901992)	18/41	1.91323e-07	8.13603e-05	0	0	3.78959	58.6224	RB1;KMT2E;ANKRD17;UBE2C;CUL3;RCC2;NSMCE2;DBF4B;PHB2;RPTOR;RAD51B;ESPL1;ANAPC5;PLCB1;DTL;DLGAP5;BRD4;EIF4G1
DNA metabolic process (GO:0006259)	68/315	2.49426e-07	9.79092e-05	0	0	1.86338	28.3311	SMARCAL1;MCM8;RBPJ;ING4;TATDN3;POLB;ENDOV;EXO1;CHEK1;LONP1;KAT7;POLL;TOPBP1;POLH;POLG;TOP3B;PARP3;RFC4;LIG1;NCOA6;RFC2;USP3;USP45;SETMAR;INIP;TSN;RAD51B;SUPV3L1;KIN;RAD51D;DBF4;POLG2;PAPD7;FANCD2;PSME4;DNA2;MCM6;TP53;TELO2;EXD2;SP100;BLM;UHRF1;DOT1L;IGHMBP2;PDS5A;RAD51AP1;BRIP1;ORC6;ERI1;POLD1;ERI3;RPS3;RAD54L;MUTYH;MBD4;UVRAG;ACD;NPM1;UBE2B;FANCA;DONSON;NAP1L1;MTOR;TDP1;RAD17;ATM;RAD18
ubiquitin-dependent protein catabolic process (GO:0006511)	72/342	3.12385e-07	0.000113864	0	0	1.81723	27.2204	GSK3B;UBXN2B;UBE3C;RNF14;FAF1;UBE2D2;USP33;UBE2D3;LTN1;UBE3A;ARRB1;PSMD9;PSMD5;ENC1;PSMD1;TRIM25;ARIH1;BTRC;GTSE1;FBXO7;ANAPC7;UBE4A;ARMC8;PPP2R5C;FBXO11;PSMA1;KCTD10;PSMA2;PSME4;ANAPC4;ANAPC5;TP53;CACUL1;DTL;VPS28;ANAPC1;CUL5;PSMD14;UBA7;UHRF1;CUL3;CUL2;CUL1;UBR4;RNF8;UBR3;PSMA7;BAG6;ATXN3;MTA1;PSMB1;UBR5;RANBP2;ANKIB1;UBE2B;SMURF2;UBE2C;HUWE1;CHFR;RNF146;CUL4A;ABTB1;UBE2W;COPS3;UBXN11;APC;RFWD2…
regulation of mitotic cell cycle phase transition (GO:1901990)	46/185	3.48623e-07	0.000118601	0	0	2.1463	31.9139	CEP57;DYNC1I2;PSMD14;CUL1;CCP110;PSMA7;AURKA;PSMD9;ACTR1A;HAUS8;PSMD5;CEP70;PSMB1;PSMD1;CEP250;KNTC1;CEP192;BTRC;CEP76;CEP290;NINL;TMEM14B;PLK4;HSP90AA1;CEP135;ANAPC7;UBE2C;NDE1;CKAP5;TUBA4A;CENPE;CDK6;PSMA1;PSMA2;ZW10;CENPJ;PSME4;CDC16;PSMC2;ALMS1;ANAPC4;FGFR1OP;ANAPC5;SFI1;ANAPC1;SDCCAG8
mitotic nuclear division (GO:0140014)	25/75	5.50414e-07	0.000175548	0	0	2.87728	41.4691	CEP57;BCCIP;KIF11;DSN1;CHEK2;NUP62;NUSAP1;CEP192;CLASP2;SPAG5;UBE2C;NDE1;KNSTRN;ZWINT;NDC80;WRAP73;KIF18B;ESPL1;KIF2A;CEP57L1;ZW10;PPP2R2D;TUBGCP5;BIRC5;TUBGCP4
peptidyl-lysine dimethylation (GO:0018027)	8/10	1.16326e-06	0.000349182	0	0	6.90548	94.3585	SUV39H2;SETD3;EHMT2;SETD7;SMYD2;EHMT1;SETMAR;ASH1L
mitotic spindle organization (GO:0007052)	24/75	2.11584e-06	0.000599841	0	0	2.76219	36.091	GPSM2;SUN2;STIL;BCCIP;KIF23;TTK;KIF11;AURKC;AURKB;NDC80;AURKA;WRAP73;CENPE;KIF2A;CHEK2;KIF4A;NUF2;TBCE;TUBGCP5;RCC1;BIRC5;CEP192;TUBGCP4;CLASP2
double-strand break repair (GO:0006302)	36/142	3.90753e-06	0.000997005	0	0	2.18836	27.2507	EXD2;BLM;DCLRE1C;PSMD14;TONSL;RNF8;SMC5;NUCKS1;BRCC3;RAD54B;RAD51AP1;ZFYVE26;BRIP1;NIPBL;MTA1;RNF138;CHEK2;UIMC1;POLL;ORAOV1;PARP3;HELQ;XRCC4;POLM;NSMCE2;SETMAR;MND1;SPIDR;APTX;RAD51B;RAD51D;SFPQ;PAPD7;TDP1;ATM;DNA2
RNA splicing, via transesterification reactions with bulged adenosine as nucleophile (GO:0000377)	52/237	3.77218e-06	0.00101313	0	0	1.89391	23.6509	ISY1;HNRNPU;HNRNPR;USP39;CCAR1;SYNCRIP;METTL14;RSRC1;SNRNP70;IGFLR1;PAPOLA;TXNL4A;CTNNBL1;SNRPN;PRPF40B;PRPF4B;SRRM1;GCFC2;SFPQ;PRPF6;DDX39B;HNRNPH1;PRPF3;SRSF3;PPIE;SRSF4;SRSF5;CACTIN;SLU7;SRSF7;DHX9;WBP4;SRSF1;FIP1L1;DHX35;RALY;POLR2G;POLR2H;SF3B1;FUS;CPSF3;NONO;UPF3B;U2SURP;HNRNPL;NUDT21;HNRNPD;RBM41;BUD13;HNRNPC;PPIL3;SUGP1
mRNA processing (GO:0006397)	59/284	5.46056e-06	0.00132692	0	0	1.79324	21.7304	ISY1;HNRNPU;HNRNPR;USP39;CCAR1;SYNCRIP;METTL14;RSRC1;SNRNP70;IGFLR1;PAPOLA;TXNL4A;CTNNBL1;SNRPN;SCAF11;THOC1;PRPF40B;PRPF4B;THOC5;SRRM1;KIN;GCFC2;SFPQ;PRPF6;DDX39B;HNRNPH1;PRPF3;SRSF3;PPIE;SRSF4;SRSF5;CACTIN;SLU7;SRSF7;DHX9;WBP4;SRSF1;FIP1L1;DHX35;RALY;POLR2G;POLR2H;SF3B1;CHTOP;FUS;CPSF3;NONO;UPF3B;U2SURP;HNRNPL;NUDT21;CDK7;HNRNPD;RBM41;AGGF1;BUD13;HNRNPC;PPIL3;SUGP1
regulation of cellular response to heat (GO:1900034)	24/79	5.87497e-06	0.00136273	0	0	2.62233	31.5855	NUP214;NDC1;RANBP2;GSK3B;HSP90AA1;CREBBP;NUP107;HSP90AB1;NUP188;CCAR2;NUP160;MTOR;RPTOR;DNAJC2;DNAJB6;NUP85;CHORDC1;NUP62;MLST8;MAPK1;NUP54;ATM;CAMK2G;MAPK3
RNA splicing (GO:0008380)	29/107	8.27197e-06	0.00175883	0	0	2.33947	27.378	MAPKBP1;USP39;CCAR2;PPP2CA;SYNCRIP;SNRNP70;RSRC1;KHSRP;TXNL4A;SF3B1;IVNS1ABP;SRPK2;SNRPN;SCAF11;NONO;PRPF4B;SRRM1;SMU1;DDX19A;SFPQ;PRPF6;DDX39B;TEP1;PRPF3;LUC7L3;SRSF4;HNRNPC;SRSF7;SLU7
protein modification by small protein removal (GO:0070646)	55/262	8.13003e-06	0.00180381	0	0	1.81203	21.2369	USP36;USP33;PTEN;CCP110;POLB;SENP6;PSMD9;PSMD5;UIMC1;PSMD1;TRIM25;SKP2;NFRKB;USP4;DDX58;USP3;USP45;ACTR8;SENP3;UCHL5;CCNA2;RNF123;PSMA1;PSMA2;TRAF3;PSME4;TP53;BECN1;USP14;USP15;USP16;PSMD14;USP11;COPS7B;FOXK2;BRCC3;PSMA7;ATXN3;RHOT1;PSMB1;NLRP3;USP25;MBD5;SMAD4;SMURF2;MCRS1;SENP3-EIF4A1;RNF146;COPS3;COPS5;APC;COPS2;PSMC2;COPS8;OGT
modification-dependent protein catabolic process (GO:0019941)	35/142	1.03429e-05	0.0021112	0	0	2.12757	24.4228	ZFAND4;PSMD14;UBA7;UHRF1;UBE2D2;CUL3;USP33;UBE2D3;UBR4;RNF8;UBR3;ARRB1;BAG6;PSMD9;ATXN3;UBR5;LONP1;TRIM25;ARIH1;BTRC;FBXO7;RANBP2;UBE2B;SMURF2;UBE2C;UBE4A;FBXO11;CHFR;RNF146;COPS3;KCTD10;PSMC2;TRIP12;DTL;PCYOX1
RNA export from nucleus (GO:0006405)	31/120	1.18904e-05	0.00224728	0	0	2.22989	25.2865	NUP107;NUP188;SRSF1;NUP160;NXF1;FIP1L1;NUP85;NUP62;XPO5;IGFLR1;NUP214;NDC1;RANBP2;CHTOP;NPM1;SSB;CPSF3;THOC1;UPF3B;TSC1;THOC5;SRRM1;DDX19A;DDX39B;SRSF3;SRSF4;NUP54;BUD13;SRSF5;SRSF7;SLU7
misfolded or incompletely synthesized protein catabolic process (GO:0006515)	12/26	1.1472e-05	0.0022516	0	0	3.98393	45.3196	BAG6;ATXN3;UBE2W;CUL3;POMT1;NGLY1;DERL1;LONP1;OMA1;UGGT1;HDAC6;ANKZF1
cellular protein modification process (GO:0006464)	160/1002	1.25675e-05	0.00229044	0	0	1.37834	15.5537	RAB3A;CCNT1;GMFG;UBE2D2;UBE2D3;CCNF;TESK2;F13A1;PPP2R2A;DCAF7;LOXL2;DCAF6;HERC5;PSMD9;RPS6KA3;PPP4R1;TBK1;RPS6KA5;PSMD5;AKT2;OGFOD1;CHEK2;STK16;CHEK1;MACROD1;PSMD1;PIM2;NEK3;BTRC;SKP2;FBXO7;ATG3;CSNK1G3;DAPK1;COG3;ATG10;ALG3;PRPF4B;VRK1;PASK;FBXO11;RUNX3;FBXW2;MELK;PSME4;TNIK;CUL9;MTMR3;PSMD14;UBA7;CUL5;CUL3;CUL2;CUL1;COPS7B;LTBP1;MTMR6;KRBOX4;PORCN;ST3GAL6;ATG7;ATG5;UBE2F;PLK4;SRPK2;MGEA5;DMPK;E…
positive regulation of metaphase/anaphase transition of cell cycle (GO:1902101)	6/7	1.51583e-05	0.00257842	0	0	7.39873	82.1034	RB1;ESPL1;CUL3;NSMCE2;ANAPC5;DLGAP5
histone modification (GO:0016570)	27/99	1.4778e-05	0.00260041	0	0	2.35414	26.1836	HDAC4;USP36;HDAC5;USP16;HDAC10;UHRF1;EHMT2;HDAC11;EHMT1;AURKC;AURKB;HDAC6;RPS6KA5;NSD1;CREBBP;PHC1;UBE2B;PRMT2;USP3;HUWE1;MSL3;SUPT3H;CCNA2;KAT6B;CARM1;EZH2;MAP3K12
mRNA transport (GO:0051028)	28/105	1.63672e-05	0.00269426	0	0	2.30183	25.3667	NUP107;NUP188;FMR1;SRSF1;NUP160;NXF1;FIP1L1;NUP85;NUP62;IGFLR1;NUP214;NDC1;RANBP2;CHTOP;CPSF3;THOC1;UPF3B;THOC5;SRRM1;DDX19A;DDX39B;SRSF3;SRSF4;NUP54;BUD13;SRSF5;SRSF7;SLU7
mRNA splicing, via spliceosome (GO:0000398)	54/262	1.69399e-05	0.00270138	0	0	1.77908	19.5447	ISY1;HNRNPU;HNRNPR;USP39;CCAR1;SYNCRIP;METTL14;RSRC1;SNRNP70;IGFLR1;PAPOLA;TXNL4A;CTNNBL1;SNRPN;SCAF11;PRPF40B;PRPF4B;SRRM1;GCFC2;SFPQ;PRPF6;DDX39B;HNRNPH1;PRPF3;SRSF3;PPIE;SRSF4;SRSF5;CACTIN;SLU7;SRSF7;DHX9;WBP4;SRSF1;FIP1L1;DHX35;RALY;POLR2G;POLR2H;SF3B1;SRPK2;FUS;CPSF3;NONO;UPF3B;U2SURP;HNRNPL;NUDT21;HNRNPD;RBM41;BUD13;HNRNPC;PPIL3;SUGP1
mRNA-containing ribonucleoprotein complex export from nucleus (GO:0071427)	27/101	2.19266e-05	0.00339065	0	0	2.30752	24.7547	NUP107;NUP188;SRSF1;NUP160;NXF1;FIP1L1;NUP85;NUP62;IGFLR1;NUP214;NDC1;RANBP2;CHTOP;CPSF3;THOC1;UPF3B;THOC5;SRRM1;DDX19A;DDX39B;SRSF3;SRSF4;NUP54;BUD13;SRSF5;SRSF7;SLU7
regulation of DNA damage checkpoint (GO:2000001)	7/10	2.42292e-05	0.00353262	0	0	6.0423	64.2172	ETAA1;DDX39B;CRY1;THOC1;THOC5;WDR76;CCAR2
positive regulation of telomerase activity (GO:0051973)	14/36	2.38886e-05	0.00358539	0	0	3.35683	35.7238	CCT2;ACD;HSP90AA1;HSP90AB1;NVL;PARN;AURKB;TCP1;HNRNPD;MAPK1;MAPKAPK5;NAF1;CCT4;MAPK3
proteasome-mediated ubiquitin-dependent protein catabolic process (GO:0043161)	58/292	2.64207e-05	0.00364391	0	0	1.71455	18.0737	GSK3B;UBXN2B;FAF1;CCNF;UBE2D3;LTN1;UBE3A;ARRB1;AUP1;PSMD9;PSMD5;PSMD1;BTRC;SKP2;GTSE1;ANAPC7;UBE4A;ARMC8;PPP2R5C;PSMA1;NEMF;KCTD10;PSMA2;PSME4;ANAPC4;ANAPC5;TP53;ANAPC1;RNF121;PSMD14;CUL3;DERL1;CUL1;UBR3;PSMA7;AURKB;AURKA;BAG6;ATXN3;MTA1;TMEM67;PSMB1;ANKZF1;UBE2B;SMURF2;UBE2C;CUL4A;ABTB1;UBE2W;UBXN11;APC;RFWD2;JKAMP;CDC16;PSMC2;DNAJC10;ERCC8;STT3B
regulation of cell cycle process (GO:0010564)	25/91	2.6396e-05	0.00374163	0	0	2.37139	24.9999	CUL9;BECN1;NUMA1;CCP110;FOXM1;PKMYT1;AURKC;AURKB;AURKA;CDC42;ZFYVE26;RACGAP1;AKT2;RCC1;RPRD1B;RAB11FIP3;UVRAG;PLK3;BORA;SPAG5;KNSTRN;APC;CDC16;BIRC6;CALM1
positive regulation of DNA biosynthetic process (GO:2000573)	18/56	3.63031e-05	0.00487513	0	0	2.77452	28.3656	CCT2;HSP90AA1;ACD;HSP90AB1;RFC4;NVL;RFC2;PARN;AURKB;TCP1;MAPK1;MAPKAPK5;NAF1;ATM;CCT8;CCT7;CCT4;MAPK3
sister chromatid segregation (GO:0000819)	13/33	3.96965e-05	0.00494076	0	0	3.40043	34.4608	RB1;CEP57;SPAG5;KNSTRN;ZWINT;NDC80;LATS1;DSN1;KIF18B;ESPL1;CEP57L1;ZW10;NUSAP1
positive regulation of telomere maintenance via telomerase (GO:0032212)	13/33	3.96965e-05	0.00506428	0	0	3.40043	34.4608	CCT2;ACD;PARN;AURKB;TCP1;MAPK1;MAPKAPK5;NAF1;ATM;CCT8;CCT7;CCT4;MAPK3
nuclear export (GO:0051168)	25/93	3.9369e-05	0.00515128	0	0	2.32039	23.5346	NUP188;CSE1L;SRSF1;PKD1;NXF1;XPO1;CHORDC1;XPO5;NUP62;IGFLR1;NUP214;RANBP2;CHTOP;STRADB;THOC1;UPF3B;THOC5;SRRM1;NEMF;DDX39B;SRSF3;SRSF4;SRSF5;SLU7;SRSF7
regulation of DNA replication (GO:0006275)	19/62	4.69439e-05	0.00544442	0	0	2.64524	26.364	ANKRD17;BLM;ESCO1;DHX9;SHC1;EHMT2;PDGFA;NUCKS1;ESCO2;DBF4B;SMC3;PDS5A;IGF1R;PPP2CA;CCDC88A;DBF4;CDAN1;RAD17;DNA2
RNA 3'-end processing (GO:0031123)	19/62	4.69439e-05	0.00557104	0	0	2.64524	26.364	ZCCHC11;CHTOP;CPSF3;SRSF1;THOC1;UPF3B;THOC5;SRRM1;SUPV3L1;NUDT21;DDX39B;FIP1L1;IGFLR1;PAPOLA;SRSF3;SRSF4;SRSF5;SLU7;SRSF7
regulation of cellular response to stress (GO:0080135)	27/105	4.62934e-05	0.00562465	0	0	2.21962	22.1529	GSK3B;NUP107;HSP90AB1;NUP188;CCAR2;NUP160;RPTOR;DNAJB6;NUP85;CHORDC1;NUP62;MLST8;MAPK1;CAMK2G;MAPK3;NUP214;NDC1;RANBP2;CREBBP;HSP90AA1;NPM1;EIF2AK4;MTOR;DNAJC2;ATM;NUP54;EIF4G1
mRNA export from nucleus (GO:0006406)	27/106	5.53441e-05	0.00600895	0	0	2.19868	21.5513	NUP107;NUP188;SRSF1;NUP160;NXF1;FIP1L1;NUP85;NUP62;IGFLR1;NUP214;NDC1;RANBP2;CHTOP;CPSF3;THOC1;UPF3B;THOC5;SRRM1;DDX19A;DDX39B;SRSF3;SRSF4;NUP54;BUD13;SRSF5;SRSF7;SLU7
DNA damage induced protein phosphorylation (GO:0006975)	6/8	5.46402e-05	0.0060615	0	0	6.47389	63.5395	CHEK2;CHEK1;CRY1;ATM;MAPK12;MAPK3
positive regulation of mitotic sister chromatid separation (GO:1901970)	6/8	5.46402e-05	0.0061962	0	0	6.47389	63.5395	RB1;ESPL1;CUL3;NSMCE2;ANAPC5;DLGAP5
cellular response to starvation (GO:0009267)	27/108	7.83602e-05	0.00833067	0	0	2.15796	20.4018	BECN1;MTMR3;EHMT2;NPRL2;USP33;CLEC16A;RRP8;RPTOR;IFI16;SESN1;LAMP2;MAPK1;ATG7;ATG5;MAPK3;SREBF1;SZT2;WDR59;MIOS;AKR1C3;EIF2AK2;EIF2AK4;SREBF2;MTOR;MARS;DEPDC5;TP53
positive regulation of telomere maintenance via telomere lengthening (GO:1904358)	13/35	8.17965e-05	0.00851852	0	0	3.20612	30.1736	CCT2;ACD;PARN;AURKB;TCP1;MAPK1;MAPKAPK5;NAF1;ATM;CCT8;CCT7;CCT4;MAPK3
protein polyubiquitination (GO:0000209)	55/284	8.6093e-05	0.00878665	0	0	1.67166	15.6469	LRSAM1;UBE3C;RNF14;UBE2D2;CCNF;UBE2D3;UBE3A;HERC5;PSMD9;NPEPPS;PSMD5;UBE2Q2;PSMD1;ARIH1;BTRC;SKP2;FBXO7;UNKL;ANAPC7;UBE4A;FBXO11;RC3H2;FBXW2;RNF167;PSMA1;PSMA2;PSME4;ANAPC4;ANAPC5;UBE2V1;DTL;ANAPC1;PSMD14;CUL3;CUL1;RNF8;PSMA7;RNF138;PSMB1;UBR5;ANKIB1;PPIL2;UBE2B;SMURF2;UBE2C;HUWE1;CHFR;RNF146;UBE2W;CDC16;PSMC2;TPP2;ERCC8;TRIP12;BLMH
phosphorylation (GO:0016310)	70/387	9.85644e-05	0.00898168	0	0	1.56132	14.4028	GSK3B;PANK2;DGKD;CCNT1;GMFG;DGKA;ADK;TESK2;IKBKB;RPS6KA3;DSTYK;PPP4R1;TBK1;RPS6KA5;GNPTAB;FASTK;CHEK2;STK16;CHEK1;TLK2;PIM2;NEK3;IKBKE;MAP4K1;KSR1;DAPK1;MINK1;VRK1;PRPF4B;PASK;DGKZ;RUNX3;LATS1;MELK;LCK;BIRC5;BIRC6;TNIK;SGK1;AURKC;AURKB;AURKA;FGGY;MKNK2;MAPK1;MAP4K5;NADK;MAP4K3;MAP4K4;MAPK3;PLK4;SRPK2;SURF1;CDK11A;DMPK;EIF2AK2;EIF2AK4;MTOR;GNPTG;CDK7;CDK6;STK25;STK17A;NEK10;CDK10;PKN2;ATM;GALK2;CD…
histone H4-K5 acetylation (GO:0043981)	8/15	9.71027e-05	0.00900936	0	0	4.60365	42.5366	ING4;KANSL1;PHF20;KANSL2;MCRS1;KAT7;JADE2;OGT
regulation of centriole replication (GO:0046599)	8/15	9.71027e-05	0.0091762	0	0	4.60365	42.5366	PLK4;NPM1;STIL;CENPJ;NUP62;TRIM37;CEP76;MDM1
regulation of mitotic metaphase/anaphase transition (GO:0030071)	8/15	9.71027e-05	0.00934934	0	0	4.60365	42.5366	RB1;CENPE;ESPL1;UBE2C;CUL3;NSMCE2;ANAPC5;DLGAP5
RNA transport (GO:0050658)	22/81	9.48314e-05	0.00948872	0	0	2.34445	21.7176	NUP214;RANBP2;CHTOP;NUP188;FMR1;SRSF1;THOC1;UPF3B;THOC5;CKAP5;SRRM1;NXF1;DDX39B;XPO5;NUP62;IGFLR1;FLOT1;SRSF3;SRSF4;SRSF5;SLU7;SRSF7
histone H4-K8 acetylation (GO:0043982)	8/15	9.71027e-05	0.00952913	0	0	4.60365	42.5366	ING4;KANSL1;PHF20;KANSL2;MCRS1;KAT7;JADE2;OGT
stress-activated protein kinase signaling cascade (GO:0031098)	20/71	0.000112305	0.00988088	0	0	2.43151	22.1128	MAP2K3;MAP4K1;MAP3K3;STRADB;MAPKAP1;MINK1;CUL1;IKBKB;STK25;CCDC88C;MAPK1;KAT7;CCM2;TNIK;BTRC;MAP4K5;MAP2K5;MAP4K3;MAPK3;MAP4K4
protein ubiquitination involved in ubiquitin-dependent protein catabolic process (GO:0042787)	20/71	0.000112305	0.0100542	0	0	2.43151	22.1128	ANKIB1;UBE3C;CUL5;SMURF2;RNF14;CUL3;CUL2;UBR4;CUL1;HUWE1;UBE3A;CUL4A;ABTB1;ENC1;UBR5;TRIP12;ARIH1;FBXO7;CACUL1;CUL4B
positive regulation of mitotic metaphase/anaphase transition (GO:0045842)	6/9	0.000147756	0.0127796	0	0	5.75457	50.755	RB1;ESPL1;CUL3;NSMCE2;ANAPC5;DLGAP5
regulation of DNA metabolic process (GO:0051052)	15/47	0.000174495	0.0141341	0	0	2.75485	23.8394	ANKRD17;ESCO1;UHRF1;EHMT2;THOC1;NUCKS1;ESCO2;HDAC8;SMC3;PPP2CA;CCDC88A;HNRNPD;UBE2V1;MPHOSPH8;POLH
regulation of telomere maintenance via telomerase (GO:0032210)	16/52	0.000173468	0.0142776	0	0	2.65595	22.9993	CCT2;ACD;TINF2;PARN;HNRNPU;AURKB;TCP1;MAPK1;MAPKAPK5;NAF1;ATM;CCT8;HNRNPC;CCT7;CCT4;MAPK3
proteasomal protein catabolic process (GO:0010498)	47/238	0.000169297	0.0143987	0	0	1.70461	14.8026	GSK3B;UBXN2B;PSMD14;FAF1;CUL3;UBE2D3;DERL1;LTN1;CUL1;UBE3A;ARRB1;PSMA7;BAG6;PSMD9;ATXN3;MTA1;PSMD5;ENC1;PSMB1;PSMD1;TRIM25;BTRC;GTSE1;ANAPC7;UBE2B;SMURF2;UBE2C;ARMC8;PPP2R5C;CUL4A;ABTB1;UBE2W;PSMA1;UBXN11;APC;KCTD10;PSMA2;RFWD2;PSME4;CDC16;PSMC2;ANAPC4;ERCC8;ANAPC5;TP53;ANAPC1;CUL4B
protein deubiquitination (GO:0016579)	50/258	0.00017307	0.0144783	0	0	1.67284	14.4898	USP36;USP33;PTEN;CCP110;POLB;PSMD9;PSMD5;UIMC1;PSMD1;TRIM25;SKP2;NFRKB;USP4;DDX58;USP3;USP45;ACTR8;UCHL5;SUPT3H;CCNA2;RNF123;PSMA1;PSMA2;TRAF3;PSME4;TP53;BECN1;USP14;USP15;USP16;PSMD14;SHMT2;USP11;FOXK2;BRCC3;PSMA7;ATXN3;RHOT1;PSMB1;NLRP3;USP25;MBD5;SMAD4;SMURF2;MCRS1;RNF146;COPS5;APC;PSMC2;OGT
organelle disassembly (GO:1903008)	9/20	0.000187696	0.0149659	0	0	3.88433	33.3302	MCTS1;PLK3;KIF9;RB1CC1;MTIF2;VRK1;MTIF3;KLC1;MRRF
transcription-coupled nucleotide-excision repair (GO:0006283)	20/74	0.000208569	0.0163742	0	0	2.33293	19.7722	ISY1;RFC4;LIG1;RFC2;COPS7B;CUL4A;COPS3;CDK7;COPS5;PAPD7;POLD1;COPS2;PPIE;ERCC8;TCEA1;POLR2G;ERCC5;POLR2H;COPS8;CUL4B
COPII-coated vesicle budding (GO:0090114)	19/69	0.000228763	0.0171673	0	0	2.37689	19.925	NAPA;RAB1A;SEC24B;SERPINA1;TMED10;SAR1A;CUL3;GOSR2;TRAPPC4;KLHL12;SCFD1;GORASP1;COL7A1;PPP6R3;PREB;SEC24C;CTSC;SEC31B;SEC31A
histone H4 acetylation (GO:0043967)	15/48	0.000226876	0.0172798	0	0	2.69745	22.6346	KMT2A;PHF20;MCRS1;MSL3;YEATS4;ELP3;JADE2;ING4;PER1;KANSL1;KANSL2;EPC1;KAT7;BRD8;OGT
regulation of telomerase activity (GO:0051972)	14/43	0.000225182	0.0174107	0	0	2.81037	23.6032	CCT2;ACD;HSP90AA1;HSP90AB1;NVL;PARN;AURKB;TCP1;MAPK1;MAPKAPK5;NAF1;TP53;CCT4;MAPK3
DNA replication (GO:0006260)	28/121	0.000242287	0.0179187	0	0	1.99745	16.6296	BLM;MCM8;IGHMBP2;POLB;ING4;BRIP1;ORC6;EXO1;POLD1;CHEK1;REV3L;KAT7;POLL;TOPBP1;POLG;RFC4;NCOA6;RFC2;DONSON;NAP1L1;BAZ1A;KIN;DBF4;POLG2;RAD17;ATM;DNA2;MCM6
nucleic acid metabolic process (GO:0090304)	21/81	0.000274927	0.0200422	0	0	2.23789	18.3484	SMARCAL1;EXD2;DDX24;HNRNPU;DDX54;SETMAR;HNRNPR;HNRNPL;METTL14;HNRNPH1;ERI1;XRN2;ERI3;HNRNPD;DXO;POLR2G;TOPBP1;DNA2;POLR2H;HNRNPC;POLG
RNA metabolic process (GO:0016070)	39/192	0.000322896	0.0232075	0	0	1.75334	14.0937	EIF4A2;DDX6;RNASEH2B;DDX24;DHX9;CELF2;PARN;HNRNPU;HNRNPR;DHX30;SYNCRIP;METTL14;DHX35;DHX36;PAPOLA;POLR2G;POLR2H;RBM6;RBM39;DDX59;PARP3;HELQ;LIG1;THOC1;DDX54;DDX52;SND1;LRPPRC;HNRNPL;SUPV3L1;DDX19A;DDX39B;HNRNPH1;XRN2;HNRNPD;SKIV2L;HNRNPC;DHX29;SKIV2L2
regulation of attachment of spindle microtubules to kinetochore (GO:0051988)	6/10	0.000333047	0.0236047	0	0	5.17911	41.4703	CDC42;APC;RACGAP1;SPAG5;RCC2;KNSTRN
positive regulation of isomerase activity (GO:0010912)	5/7	0.000356582	0.0245897	0	0	6.16561	48.9484	PLSCR1;DHX9;UHRF1;HNRNPU;SETMAR
regulation of response to biotic stimulus (GO:0002831)	5/7	0.000356582	0.0249266	0	0	6.16561	48.9484	HERC5;TRAF3;ELMOD2;CD55;FOXP1
positive regulation of ubiquitin protein ligase activity (GO:1904668)	21/83	0.000393967	0.0264528	0	0	2.18396	17.1206	RAB1A;ANAPC7;PSMD14;UBE2C;PTEN;CUL1;PSMA7;PSMD9;PSMA1;PSMD5;PSMA2;GORASP1;PSME4;PSMB1;PSMC2;CDC16;PSMD1;ANAPC4;ANAPC5;BTRC;ANAPC1
mitotic sister chromatid segregation (GO:0000070)	21/83	0.000393967	0.0268055	0	0	2.18396	17.1206	CEP57;BECN1;SPAG5;CUL3;NCAPG;KIF23;PDS5A;KNSTRN;ZWINT;NDC80;CENPE;NIPBL;DSN1;KIF18B;ESPL1;PAPD7;CEP57L1;ZW10;NUP62;NUSAP1;DLGAP5
histone lysine methylation (GO:0034968)	9/22	0.000447833	0.0285662	0	0	3.53121	27.2295	KMT2D;SETD3;KMT2A;EHMT2;DOT1L;SETMAR;ASH2L;EZH2;KDM6A
histone H4-K16 acetylation (GO:0043984)	7/14	0.000454102	0.0286085	0	0	4.31593	33.2205	KMT2A;KANSL1;PHF20;KANSL2;MCRS1;MSL3;OGT
DNA recombination (GO:0006310)	16/56	0.000444574	0.0287172	0	0	2.46624	19.0354	BLM;NCOA6;IGHMBP2;NUCKS1;RBPJ;TSN;RAD54B;RAD51B;SUPV3L1;RAD51AP1;RAD51D;BRIP1;EXO1;RAD54L;ATM;DNA2
cilium assembly (GO:0060271)	53/289	0.000464676	0.0289176	0	0	1.583	12.1482	CEP57;C2CD3;IFT172;CBY1;CCP110;ACTR1A;TCTN3;CEP250;BBS7;CEP97;TNPO1;NINL;CEP290;IQCB1;HSP90AA1;CEP135;RFX2;CKAP5;TUBA4A;IFT88;IFT43;WDPCP;SFI1;SDCCAG8;DYNC1I2;FBF1;HDAC6;ABLIM1;HAUS8;TMEM67;CEP70;NPHP3;CEP192;NPHP4;E2F4;CEP76;RILP;C5ORF42;PLK4;BBS2;NDE1;DNAH14;SCLT1;FUZ;TTLL3;WDR60;TMEM237;KIAA0586;CENPJ;ALMS1;TRIP11;FGFR1OP;CEP89
regulation of posttranscriptional gene silencing (GO:0060147)	16/56	0.000444574	0.0290854	0	0	2.46624	19.0354	NUP214;NDC1;RANBP2;NUP107;NUP188;FMR1;NUP160;PUM2;IPO8;NUP85;NUP62;NUP54;POLR2G;POLR2H;TNRC6A;EIF4G1
regulation of cellular macromolecule biosynthetic process (GO:2000112)	101/632	0.000475636	0.029243	0	0	1.37946	10.554	CYFIP2;RB1;ZNF573;NUP107;HDAC10;EHMT2;NAB1;ZMYND8;JMJD1C;RORA;NUCKS1;SMC3;RPL6;RPS6KA5;ZFP30;CHEK2;ZNF84;MYB;GPBP1;ZNF569;ZNF568;KAT7;ZNF200;ZNF320;ZNF19;ZNF681;ESCO1;ZNF160;USP3;TSC1;ESCO2;RUNX3;KAT6B;PPIE;ATF7;MAPKAPK5;UBE2V1;TP53;ANKRD17;KMT2D;DDX6;HKR1;CREM;NOLC1;ZKSCAN7;HIVEP3;ZNF268;RREB1;ZKSCAN1;BPTF;EIF2B4;CREBBP;ZNF263;ZNF383;DENND4A;PHF12;NONO;SMARCA2;CCDC88A;GON4L;HNRNPD;ZNF655;TCF3;EZ…
regulation of gene silencing by RNA (GO:0060966)	16/56	0.000444574	0.0294632	0	0	2.46624	19.0354	NUP214;NDC1;RANBP2;NUP107;NUP188;FMR1;NUP160;PUM2;IPO8;NUP85;NUP62;NUP54;POLR2G;POLR2H;TNRC6A;EIF4G1
positive regulation of mitotic nuclear division (GO:0045840)	13/41	0.00050094	0.0304321	0	0	2.73693	20.798	RANBP2;BECN1;NUMA1;H2AFY;UBE2C;NSMCE2;HNRNPU;SMC5;PHB2;AURKA;NIPBL;NUP62;NUSAP1
protein modification process (GO:0036211)	21/85	0.000555655	0.0333589	0	0	2.13258	15.9844	ATG3;CSNK1G3;USP25;SLC35A1;MANBA;UBA7;UBE2D2;MCRS1;UBE2D3;WDYHV1;NAGPA;RABGGTB;FBXO11;RABGGTA;FBXW2;LOXL2;GNMT;AKT2;ST3GAL6;ATG7;LCMT1
nucleotide-excision repair (GO:0006289)	25/109	0.000585352	0.0347332	0	0	1.97978	14.7361	ISY1;COPS7B;ATXN3;POLD1;POLL;POLR2G;POLR2H;ORAOV1;RFC4;LIG1;RFC2;USP45;CUL4A;COPS3;CDK7;COPS5;PAPD7;COPS2;PPIE;ERCC8;TCEA1;ERCC5;COPS8;TP53;CUL4B
anaphase-promoting complex-dependent catabolic process (GO:0031145)	20/80	0.000633156	0.0367158	0	0	2.15796	15.893	ANAPC7;PSMD14;UBE2C;CUL3;AURKB;PSMA7;AURKA;PSMD9;PSMA1;PSMD5;PSMA2;PSME4;PSMB1;PSMC2;CDC16;PSMD1;ANAPC4;ANAPC5;SKP2;ANAPC1
mitotic spindle assembly (GO:0090307)	14/47	0.00062832	0.0368542	0	0	2.57119	18.956	BCCIP;KIF23;KIF11;AURKC;AURKB;WRAP73;RACGAP1;KIF2A;CHEK2;KIF4A;TUBGCP5;BIRC5;CEP192;TUBGCP4
negative regulation of cellular macromolecule biosynthetic process (GO:2000113)	84/513	0.000651207	0.0373383	0	0	1.4134	10.3697	RB1;SUV39H2;GSK3B;HDAC10;NAB1;FMR1;ZBTB21;CBY1;EHMT1;ARID4A;RSF1;CTCF;IKZF1;RBPJ;FOXM1;PHB2;CCAR2;LOXL2;ING4;SYNCRIP;NIPBL;RPS6KA5;MYB;SCMH1;UIMC1;ENC1;EPC1;ZNF568;JARID2;BTRC;TLE1;PRMT2;DAPK1;TSC1;PASK;CBFA2T2;FOXP1;GCFC2;SFPQ;TFDP2;KAT6B;LANCL2;CRY1;BIRC5;PLCB1;GAPDH;TP53;HDAC4;HDAC5;SHC1;MALSU1;PDS5A;HDAC6;FXR2;IFI16;ZNF706;RPS3;BRD7;MTA3;SNX6;HEXIM2;ZNF263;PCGF6;SMAD4;SMURF2;PHF12;NONO;EIF2AK…
termination of RNA polymerase II transcription (GO:0006369)	18/69	0.000675619	0.0383076	0	0	2.25179	16.4378	ZNF473;CHTOP;CPSF3;SRSF1;THOC1;UPF3B;THOC5;SRRM1;NUDT21;DDX39B;FIP1L1;IGFLR1;PAPOLA;SRSF3;SRSF4;SRSF5;SLU7;SRSF7
regulation of gene expression, epigenetic (GO:0040029)	19/75	0.000718824	0.0403094	0	0	2.18674	15.8274	HDAC4;SUZ12;HDAC5;H2AFY;PHF1;CTCF;DEK;HDAC6;TAF1D;MTA1;IFI16;POLR1B;MTF2;TAF1A;EPC1;POLR2H;JARID2;SF3B1;EZH2
vesicle coating (GO:0006901)	17/64	0.000754688	0.0405387	0	0	2.29284	16.4837	NAPA;RAB1A;SEC24B;SERPINA1;TMED10;CUL3;GOSR2;TRAPPC4;KLHL12;SCFD1;GORASP1;COL7A1;PPP6R3;PREB;SEC24C;CTSC;SEC31A
response to X-ray (GO:0010165)	7/15	0.000766479	0.0407431	0	0	4.0282	28.8971	BLM;NIPBL;XRCC4;NUCKS1;ATM;BRCC3;TP53
vesicle targeting, rough ER to cis-Golgi (GO:0048207)	17/64	0.000754688	0.0409699	0	0	2.29284	16.4837	NAPA;RAB1A;SEC24B;SERPINA1;TMED10;CUL3;GOSR2;TRAPPC4;KLHL12;SCFD1;GORASP1;COL7A1;PPP6R3;PREB;SEC24C;CTSC;SEC31A
COPII vesicle coating (GO:0048208)	17/64	0.000754688	0.0414105	0	0	2.29284	16.4837	NAPA;RAB1A;SEC24B;SERPINA1;TMED10;CUL3;GOSR2;TRAPPC4;KLHL12;SCFD1;GORASP1;COL7A1;PPP6R3;PREB;SEC24C;CTSC;SEC31A
retrograde vesicle-mediated transport, Golgi to ER (GO:0006890)	20/81	0.000750608	0.0416343	0	0	2.13132	15.3341	NAPA;ARF4;RAB1A;COPB2;UVRAG;TMED10;COPB1;COG3;KIF23;KIF11;KLC1;KIF15;RINT1;CENPE;SCFD1;KIF2A;RACGAP1;ZW10;KIF4A;ATP9B
regulation of organelle assembly (GO:1902115)	14/48	0.000793621	0.041751	0	0	2.51762	17.9731	ATG3;NPM1;STIL;MTMR3;NPRL2;SENP6;KIF9;IFT88;CENPJ;VPS11;TRAPPC12;EZR;CEP76;ATG5
positive regulation of protein localization to Cajal body (GO:1904871)	5/8	0.000859823	0.0430164	0	0	5.39491	38.0815	CCT2;TCP1;CCT8;CCT7;CCT4
regulation of protein localization to Cajal body (GO:1904869)	5/8	0.000859823	0.0434423	0	0	5.39491	38.0815	CCT2;TCP1;CCT8;CCT7;CCT4
response to hydroxyurea (GO:0072710)	5/8	0.000859823	0.0438768	0	0	5.39491	38.0815	BLM;FMR1;DDX11;KAT7;SPIDR
negative regulation of cellular amide metabolic process (GO:0034249)	19/76	0.000855946	0.0441201	0	0	2.15796	15.2423	CTSA;ROCK1;DAPK1;FMR1;EIF2AK2;TSC1;CNOT10;ABCA7;MALSU1;DHFR;SYNCRIP;FXR2;SNRNP70;CNOT1;CAPRIN1;ENC1;CNOT3;RPS3;GAPDH
negative regulation of G0 to G1 transition (GO:0070317)	12/38	0.000851433	0.0443353	0	0	2.72585	19.2679	SUZ12;PCGF6;PHC1;APAF1;TFDP2;EHMT2;MGA;CHEK1;EHMT1;EPC1;RNF2;EZH2
G1/S transition of mitotic cell cycle (GO:0000082)	24/106	0.000906326	0.0449027	0	0	1.95438	13.6926	RB1;RANBP2;PLK3;CUL5;MCM8;CUL3;CUL2;CUL1;DHFR;LATS1;CUL4A;NPAT;CDK7;WEE1;ORC6;CDK6;DBF4;TFDP2;RCC1;PIM2;MCM6;CACUL1;BRD4;CUL4B
cellular macromolecule catabolic process (GO:0044265)	14/49	0.000994153	0.0487804	0	0	2.46624	17.0507	MGEA5;MANBA;RNASEH2B;NGLY1;DENND3;SND1;TATDN3;SUPV3L1;CHEK2;XRN2;HNRNPD;SKIV2L;STT3B;SKIV2L2
double-strand break repair via homologous recombination (GO:0000724)	19/77	0.0010149	0.0493241	0	0	2.12994	14.6816	EXD2;BLM;HELQ;PSMD14;NSMCE2;TONSL;NUCKS1;SMC5;SPIDR;RAD54B;RAD51B;RAD51AP1;ZFYVE26;NIPBL;RAD51D;SFPQ;RNF138;POLL;ORAOV1
DNA-templated transcription, termination (GO:0006353)	24/107	0.00104234	0.0497109	0	0	1.93612	13.2939	ZNF473;CHTOP;CPSF3;SRSF1;THOC1;UPF3B;TTF1;THOC5;SRRM1;NUDT21;CDK7;TAF1D;DDX39B;FIP1L1;POLR1B;TAF1A;IGFLR1;PAPOLA;SRSF3;SRSF4;SRSF5;POLR2H;SRSF7;SLU7
gene expression (GO:0010467)	69/412	0.00103582	0.0498657	0	0	1.44563	9.93516	RPL5;NUP107;NUP188;CELF2;HNRNPU;ASH2L;RPL6;SYNCRIP;NUP62;IGFLR1;EPC1;RPS11;RBM6;NUP214;NDC1;THOC1;SARS;DDX54;BAZ1A;THOC5;ILF2;SRRM1;MRPL52;DDX19A;DDX39B;HNRNPH1;XRN2;SRSF3;SRSF4;NUP54;SRSF5;SRSF7;MRRF;SLU7;RPL10;DHX9;SRSF1;IGHMBP2;RRBP1;NUP160;MRPL55;DHX30;NXF1;FIP1L1;NUP85;DHX35;DHX36;RPS3;TSPAN5;POLR2G;POLR2H;RPL17;BPTF;RANBP2;RBM39;CHTOP;CPSF3;UPF3B;RPL35A;HNRNPL;NR4A2;COPS5;HNRNPD;BUD13;DHX29…

## Sheet: LR_HR_rMATS_GO_MF
Term	Overlap	P-value	Adjusted P-value	Old P-value	Old Adjusted P-value	Odds Ratio	Combined Score	Genes
RNA binding (GO:0003723)	259/1388	9.14699e-16	1.05282e-12	0	0	1.6107	55.7752	EIF4A2;MAPKBP1;RPL5;SLC4A1AP;FCF1;HNRNPU;HNRNPR;PWP2;C14ORF93;CCAR2;RPL6;RRP8;CCAR1;NUDT4;HERC5;ENDOV;LONP1;TRIM25;RPS11;SCAF11;SECISBP2;DDX11;FNDC3A;HLA-A;SND1;RC3H2;SRRM1;FAM133B;DYNC1LI1;DDX39B;EWSR1;TEP1;SUB1;XRN2;FLYWCH2;DXO;EZR;MACF1;DHX9;PRKRIP1;NOLC1;ZC3HAV1;DHX30;FXR2;ERI1;DHX35;DHX36;ERI3;GAR1;TOE1;SRPK2;HEXIM2;APOBEC3D;APOBEC3F;ZRANB2;RCC2;KNOP1;EIF2AK2;UPF3B;PRRC2C;EIF2AK4;LARP4;MRPL2…
microtubule binding (GO:0008017)	51/196	1.67317e-08	9.62907e-06	0	0	2.24604	40.2176	CEP57;NUMA1;FMR1;KIF11;KIF15;POLB;FNTA;CHORDC1;NUSAP1;KIF21B;DNM1L;SUN2;STARD9;KIF23;CKAP5;EML2;EML3;KIF9;CLIP1;KIF2A;CEP57L1;BIRC5;EZR;GAPDH;MACF1;CAMSAP1;HDAC6;BCL2L11;RACGAP1;HAUS8;KATNA1;RPS3;KRIT1;CLASP2;SPAG5;RCC2;NDE1;MX1;PEX14;LRPPRC;CCDC88B;CCDC88A;CENPE;KIF18B;APC;KIF4A;CCDC88C;TUBGCP5;TUBGCP4;TPT1;MDM1
tubulin binding (GO:0015631)	61/256	2.54613e-08	9.76865e-06	0	0	2.05681	35.9656	CEP57;NUMA1;FMR1;WASH6P;KIF11;SMC3;KIF15;POLB;FNTA;CHORDC1;NUSAP1;KIF21B;DNM1L;SUN2;BCAS3;AGTPBP1;STARD9;KIF23;EML2;EML3;KIF9;RAD51D;CLIP1;KIF2A;CEP57L1;BIRC5;EZR;GAPDH;RABGAP1;WASH4P;CAMSAP1;HDAC6;BCL2L11;RACGAP1;HAUS8;KATNA1;RPS3;KRIT1;CLASP2;SPAG5;RCC2;NDE1;MX1;TBCD;WASH3P;PEX14;LRPPRC;CCDC88B;CCDC88A;CENPE;TTLL4;KIF18B;APC;CENPJ;KIF4A;CCDC88C;TUBGCP5;TUBGCP4;DNAL1;TPT1;MDM1
thyroid hormone receptor binding (GO:0046966)	14/27	3.47851e-07	0.000100094	0	0	4.47577	66.5614	MBD4;PRMT2;NCOA6;GTF2B;NCOA3;TAF11;JMJD1C;MED17;MED24;NCOR1;NSD1;NUP62;TRIP12;HMGN3
histone-lysine N-methyltransferase activity (GO:0018024)	17/42	1.68247e-06	0.000387305	0	0	3.49384	46.4515	KMT2E;SUZ12;KMT2D;SUV39H2;SETD3;KMT2A;KMT2C;EHMT2;DOT1L;SETD7;EHMT1;SETMAR;ASH2L;ASH1L;NSD1;SMYD2;EZH2
histone methyltransferase activity (GO:0042054)	18/49	4.38412e-06	0.00084102	0	0	3.17088	39.1209	KMT2E;SUZ12;SUV39H2;KMT2D;SETD3;PRMT2;KMT2A;EHMT2;KMT2C;SETD7;DOT1L;EHMT1;ASH2L;ASH1L;NSD1;CARM1;SMYD2;EZH2
protein serine/threonine kinase activity (GO:0004674)	72/369	5.79035e-06	0.0009521	0	0	1.68426	20.3111	GSK3B;CCNT1;TESK2;IKBKB;RPS6KA3;DSTYK;TBK1;RPS6KA5;CHEK2;AKT2;FASTK;CHEK1;STK16;PBK;TLK2;PIM2;NEK3;IKBKE;MAP4K1;MAP2K3;CSNK1G3;DAPK1;STRADB;MINK1;VRK1;PRPF4B;PASK;VRK3;MASTL;CIT;LATS1;MELK;PRKD3;MAPKAPK5;TNIK;ALPK1;SGK1;CSNK1G1;ROCK1;AURKC;AURKB;AURKA;CDC42;MKNK2;MAPK1;MAP4K5;MARK3;CAMK2G;MAP4K3;MAP2K5;MAP4K4;MAPK3;PLK4;SRPK2;PLK3;MAP3K3;CDK11A;DMPK;EIF2AK2;EIF2AK4;MAPK12;MTOR;CLK1;CDK7;CDK6;STK1…
kinase activity (GO:0016301)	58/281	8.03221e-06	0.00115563	0	0	1.78166	20.9026	GSK3B;PANK2;DGKD;DGKA;ADK;TESK2;IKBKB;RPS6KA3;TBK1;RPS6KA5;CHEK2;NMRK1;CHEK1;PI4KAP2;IKBKE;PDK1;MAP4K1;CSNK1G3;KSR1;DAPK1;DCAKD;MINK1;VRK1;PRPF4B;MASTL;DGKZ;COASY;PRKD3;LCK;TNIK;MVK;ROCK1;NPRL2;PKMYT1;AURKC;AURKA;MAPK1;MAP4K5;MAP4K3;MAP2K5;NADK;MAP4K4;IP6K2;MAPK3;MAP3K3;CDK11A;CHKB;EIF2AK2;MTOR;CDK7;WEE1;STK25;NEK10;ATM;PKN2;PI4KB;GALK2;MAP3K12
protein-lysine N-methyltransferase activity (GO:0016279)	17/48	1.41716e-05	0.00163115	0	0	3.05711	34.1304	KMT2E;SUV39H2;KMT2D;SETD3;KMT2A;KMT2C;EHMT2;DOT1L;SETD7;EHMT1;ASH2L;ASH1L;METTL21A;CAMKMT;NSD1;SMYD2;EZH2
single-stranded DNA binding (GO:0003697)	25/88	1.40516e-05	0.00179704	0	0	2.45223	27.3982	BLM;DHX9;IGHMBP2;HNRNPU;RAD51AP1;RNF138;DHX36;LONP1;POLR2G;POLR2H;PMS1;DDX11;SETMAR;MLH1;APTX;TSN;MLH3;RAD51B;NEIL3;RAD51D;SUB1;FUBP1;TDP1;ERCC5;SSBP2
phosphotransferase activity, alcohol group as acceptor (GO:0016773)	52/255	3.25194e-05	0.00340271	0	0	1.76022	18.1895	GSK3B;PANK2;DGKD;DGKA;ADK;TESK2;KHK;IKBKB;RPS6KA3;TBK1;RPS6KA5;NMRK1;CHEK1;PI4KAP2;IKBKE;PDK1;MAP4K1;CSNK1G3;KSR1;DAPK1;DCAKD;MINK1;VRK1;PRPF4B;DGKZ;COASY;TNIK;MVK;ROCK1;NPRL2;PKMYT1;NT5C2;AURKC;AURKA;FGGY;MAP4K5;MAP4K3;MAP2K5;NADK;IP6K2;MAP3K3;CDK11A;CHKB;EIF2AK2;MTOR;CDK7;STK25;NEK10;PKN2;PI4KB;GALK2;MAP3K12
ubiquitin protein ligase activity (GO:0061630)	42/193	3.79924e-05	0.0036441	0	0	1.87843	19.1189	LRSAM1;UBE3C;CUL5;RNF14;UHRF1;CUL3;CUL2;LTN1;CUL1;UBR3;UBE3A;HERC5;CDC42;HERC3;RNF138;UBR5;TRIM25;ARIH1;BTRC;BRAP;UBE2F;ANKIB1;PPIL2;UBE2B;SMURF2;UBE2C;HUWE1;UBE4A;CCNB1IP1;RNF146;CUL4A;UBE2W;RFWD2;TRIP12;ANAPC5;TRIM37;UBE2V1;CACUL1;RAD18;ANAPC1;RNF121;CUL4B
nuclear hormone receptor binding (GO:0035257)	18/57	4.73582e-05	0.00419303	0	0	2.72585	27.1434	BCAS3;MBD4;PRMT2;NCOA6;GTF2B;NCOA3;TAF11;JMJD1C;MED17;NCOR1;MED24;RXRA;CNOT1;NSD1;NUP62;CRY1;TRIP12;HMGN3
methylation-dependent protein binding (GO:0140034)	17/53	6.11859e-05	0.00440156	0	0	2.76871	26.8609	KDM5A;KMT2E;CBX8;SUZ12;UHRF1;ZMYND8;FMR1;PHF1;NCAPG2;MSL3;CDYL;RRP8;TDRD3;ING4;MTF2;SPIN1;MPHOSPH8
DNA-dependent ATPase activity (GO:0008094)	21/73	5.45097e-05	0.00448148	0	0	2.48314	24.3773	SMARCAL1;PBRM1;BLM;RFC4;RFC2;DHX9;DDX11;IGHMBP2;CHD3;CHD2;SMARCA2;RAD54B;RAD51B;RAD51D;BRIP1;CDK7;DHX36;MCM6;DNA2;RAD18;BPTF
lysine-acetylated histone binding (GO:0070577)	9/18	6.74826e-05	0.00456897	0	0	4.31593	41.4486	BRD3;BRD2;KMT2A;ZMYND8;CARM1;PSME4;BRD9;BRD7;BRD4
MAP kinase kinase kinase kinase activity (GO:0008349)	7/11	5.99305e-05	0.00459867	0	0	5.493	53.4047	MAP4K1;STK25;MINK1;TNIK;MAP4K5;MAP4K3;MAP4K4
ATP-dependent helicase activity (GO:0008026)	23/86	8.60923e-05	0.00495461	0	0	2.30852	21.6079	EIF4A2;DDX6;DDX59;BLM;HELQ;DDX24;DHX9;DDX11;DDX54;CHD3;DDX52;CHD2;SUPV3L1;DDX19A;DHX30;BRIP1;DDX39B;DHX35;DHX36;SKIV2L;MCM6;DHX29;SKIV2L2
ubiquitin-like protein ligase activity (GO:0061659)	40/187	8.57551e-05	0.00519495	0	0	1.84639	17.2896	LRSAM1;UBE3C;CUL5;RNF14;UHRF1;CUL3;CUL2;LTN1;CUL1;UBR3;UBE3A;HERC5;CDC42;HERC3;RNF138;UBR5;ARIH1;BTRC;UBE2F;BRAP;PPIL2;ANKIB1;UBE2B;SMURF2;UBE2C;HUWE1;CCNB1IP1;CUL4A;RNF146;UBE2W;RFWD2;ANAPC5;TRIM37;TRIP12;UBE2V1;CACUL1;ANAPC1;RAD18;RNF121;CUL4B
RNA polymerase core enzyme binding (GO:0043175)	13/35	8.17965e-05	0.00523043	0	0	3.20612	30.1736	RRN3;DHX9;GTF2B;NCOA3;HNRNPU;NOLC1;ELP2;ELP3;CCAR2;TCOF1;SMYD2;RPRD1B;BRD4
core promoter binding (GO:0001047)	25/98	0.000100121	0.00548758	0	0	2.202	20.2785	RB1;KDM5A;HDAC4;HDAC5;KMT2A;DHX9;HNRNPU;RORA;CHD2;HDAC6;CCAR1;MTA1;IFI16;DHX36;ZBTB17;MBD4;NPM1;H2AFY;NONO;SARS;SFPQ;KANSL1;CRY1;TP53;EZH2
acetylation-dependent protein binding (GO:0140033)	9/19	0.00011504	0.005757	0	0	4.08877	37.0861	BRD3;BRD2;KMT2A;ZMYND8;CARM1;PSME4;BRD9;BRD7;BRD4
histone methyltransferase activity (H3-K36 specific) (GO:0046975)	5/6	0.000112707	0.00589664	0	0	7.19321	65.3914	SETD3;NSD1;SMYD2;SETMAR;ASH1L
methylated histone binding (GO:0035064)	17/56	0.000132166	0.00633845	0	0	2.62038	23.4038	KDM5A;KMT2E;CBX8;SUZ12;UHRF1;ZMYND8;FMR1;PHF1;NCAPG2;MSL3;CDYL;RRP8;TDRD3;ING4;MTF2;SPIN1;MPHOSPH8
ubiquitin-protein transferase activity (GO:0004842)	73/418	0.000216808	0.00998182	0	0	1.50748	12.7178	RNF10;LRSAM1;UBE3C;RNF14;UBE2D2;UBE2D3;CCNF;LTN1;FBXO25;UBE3A;HERC5;HERC3;UBE2Q2;TRIM25;ARIH1;BTRC;SKP2;UNKL;FBXO7;FBXO11;RC3H2;FBXW2;CCNB1IP1;RNF123;RNF167;TRAF3;KCTD10;ANAPC4;BIRC5;ANAPC5;BIRC6;UBE2V1;CACUL1;DTL;ANAPC1;RNF121;CUL5;UBA7;UHRF1;CUL3;CUL2;CUL1;UBR4;RNF8;UBR3;KLHL12;DTX4;RNF2;CDC42;RNF138;UBR5;BRAP;UBE2F;ANKIB1;PPIL2;UBE2B;SMURF2;UBE2C;KLHL28;HUWE1;CHFR;RNF146;CUL4A;UBE2W;RFWD2;ERCC…
RNA-dependent ATPase activity (GO:0008186)	19/69	0.000228763	0.0101271	0	0	2.37689	19.925	EIF4A2;DDX6;DDX59;HELQ;DDX24;DHX9;DDX11;IGHMBP2;DDX54;DDX52;SUPV3L1;DDX19A;DHX30;DDX39B;DHX35;DHX36;SKIV2L;DHX29;SKIV2L2
protein kinase activity (GO:0004672)	86/514	0.000279122	0.0118989	0	0	1.44424	11.8195	GSK3B;CCNT1;TESK2;IGF1R;IKBKB;RPS6KA3;DSTYK;TBK1;RPS6KA5;ZMYM2;AKT2;FASTK;CHEK2;STK16;CHEK1;PBK;TLK2;PIM2;NEK3;IKBKE;PDK1;MAP2K3;MAP4K1;CSNK1G3;HSP90AA1;KSR1;DAPK1;STRADB;MINK1;VRK1;PRPF4B;PASK;VRK3;MASTL;CIT;LATS1;CCNA2;MELK;PRKD3;LCK;MAPKAPK5;TNIK;ALPK1;SGK1;CSNK1G1;ROCK1;NPRL2;PKMYT1;AURKC;AURKB;AURKA;CDC42;CUX1;GRK4;MKNK2;MAPK1;MAP4K5;MARK3;CAMK2G;MAP2K5;MAP4K3;MAP4K4;MAPK3;PLK4;SRPK2;STAT5A;…
histone serine kinase activity (GO:0035174)	5/7	0.000356582	0.0146581	0	0	6.16561	48.9484	MELK;VRK1;AURKC;AURKB;AURKA
ATPase activity (GO:0016887)	40/204	0.000576211	0.0207256	0	0	1.69252	12.6246	EIF4A2;MACF1;DYNC1I2;BLM;ABCD3;DHX9;ATP5A1;DNHD1;KIF11;KIF15;SMCHD1;KATNA1;CARNS1;ATP6V1H;KIF21B;CCT8;PMS1;HSPA9;ABCA2;HSP90AA1;ABCC1;HSPA4;DNAH14;ATAD2;ABCA7;KIF23;PEX1;MLH1;CLPX;MLH3;CENPE;KIF9;KIF18B;DDX39B;KIF2A;WDR60;KIF4A;PSMC2;ACIN1;DNA2
ATP-dependent RNA helicase activity (GO:0004004)	18/68	0.000559047	0.0207569	0	0	2.2849	17.1123	EIF4A2;DDX6;DDX59;HELQ;DDX24;DHX9;IGHMBP2;DDX54;DDX52;SUPV3L1;DDX19A;DHX30;DDX39B;DHX35;DHX36;SKIV2L;DHX29;SKIV2L2
RNA helicase activity (GO:0003724)	18/68	0.000559047	0.0214488	0	0	2.2849	17.1123	EIF4A2;DDX6;DDX59;HELQ;DDX24;DHX9;DDX54;DDX52;RAD54B;SUPV3L1;DDX19A;DHX30;DDX39B;DHX35;DHX36;SKIV2L;DHX29;SKIV2L2
RNA polymerase II core binding (GO:0000993)	10/27	0.000557628	0.0221321	0	0	3.19698	23.9512	DHX9;GTF2B;NCOA3;SMYD2;HNRNPU;ELP2;RPRD1B;ELP3;CCAR2;BRD4
translation initiation factor activity (GO:0003743)	12/37	0.000650395	0.022685	0	0	2.79952	20.5427	EIF5B;EIF2B4;EIF2B3;EIF2B2;EIF2S3;COPS5;EIF3I;EIF3G;EIF3E;MTIF3;EIF3A;EIF4G1
basal RNA polymerase II transcription machinery binding (GO:0001099)	10/8	0.000778075	0.0263401	0	0	3.0828	22.0688	DHX9;GTF2B;NCOA3;SMYD2;HNRNPU;ELP2;RPRD1B;ELP3;CCAR2;BRD4
estrogen receptor binding (GO:0030331)	11/33	0.000837414	0.027539	0	0	2.87728	20.3861	LATS1;MBD4;PRMT2;NCOA6;CNOT1;NSD1;DDX54;WIPI1;PHB2;DCAF13;PPID
ubiquitin protein ligase binding (GO:0031625)	51/285	0.00104085	0.0323788	0	0	1.54465	10.6082	RB1;RPL5;GSK3B;ZFAND4;FAF1;ARRB1;CHEK2;UBXN7;ARIH1;DNM1L;FBXO7;IKBKE;CCT2;DDX58;SCAMP3;TRAF3;TCP1;TMBIM6;UBE2V1;TP53;CACUL1;BECN1;CUL5;CUL3;CUL2;DERL1;CUL1;RNF8;HDAC6;BAG6;ATXN3;TNFRSF14;UBE2F;HSPA9;USP25;UBE2B;UBE2C;FZD6;LRPPRC;CUL4A;ABTB1;PER1;UBE2W;ABI2;APC;JKAMP;TRIM37;LTBR;MPHOSPH8;RAD18;CUL4B
steroid hormone receptor binding (GO:0035258)	19/77	0.0010149	0.0324486	0	0	2.12994	14.6816	RB1;MBD4;KDM5D;PRMT2;RNF14;NCOA6;NCOA3;DDX54;WIPI1;PHB2;FOXP1;LATS1;NR4A2;CDK7;PRPF6;CNOT1;NSD1;PPID;DCAF13
poly-purine tract binding (GO:0070717)	8/20	0.0011145	0.0337577	0	0	3.45274	23.4764	TIA1;DAZAP1;FMR1;MCRS1;HNRNPU;PPIE;LARP4;ZC3H14
tRNA (guanine) methyltransferase activity (GO:0016423)	6/12	0.00119218	0.0351847	0	0	4.31593	29.0547	WDR4;THUMPD2;THUMPD3;TRMT1;TRMT11;TARBP1
helicase activity (GO:0004386)	11/35	0.00145088	0.0417491	0	0	2.71287	17.7302	EIF4A2;SUPV3L1;DDX6;BLM;DDX24;DHX9;DDX11;IGHMBP2;CHD3;DNA2;RAD54B
ubiquitin-like protein ligase binding (GO:0044389)	52/298	0.00165968	0.0454831	0	0	1.50623	9.64157	RB1;RPL5;GSK3B;ZFAND4;FAF1;ARRB1;CHEK2;UBXN7;ARIH1;DNM1L;FBXO7;IKBKE;CCT2;DDX58;SCAMP3;TRAF3;TCP1;TMBIM6;UBE2V1;TP53;CACUL1;BECN1;CUL5;CUL3;CUL2;DERL1;CUL1;RNF8;HDAC6;BAG6;ATXN3;TNFRSF14;UBE2F;HSPA9;USP25;UBE2B;UBE2C;STAT2;FZD6;LRPPRC;CUL4A;ABTB1;PER1;UBE2W;ABI2;APC;JKAMP;TRIM37;LTBR;MPHOSPH8;RAD18;CUL4B
kinase binding (GO:0019900)	69/419	0.0016221	0.0455375	0	0	1.42147	9.1316	RB1;GSK3B;HSP90AB1;FAF1;ITGB2;KIF11;FOXM1;CD3E;AP2A2;PKD1;IKBKB;RPTOR;CHEK2;RB1CC1;CHORDC1;CDK5RAP1;CEP250;FBXO7;MAP2K3;IFNAR2;BORA;H2AFY;NCOA3;VRK1;TUBA4A;LATS1;CCNA2;DBF4;LCK;ARHGEF7;CACUL1;TP53;EXOC2;TELO2;BECN1;SP100;SHC1;PRKRIP1;MAPKAP1;PARN;DBF4B;ADIPOR1;RHOBTB1;AURKB;AURKA;CDC42;RACGAP1;RNF138;SV2A;RPS3;PLCG1;NEK9;SLC12A4;NPM1;ERCC6L2;RCC2;TPCN2;MOB1B;PER1;IBTK;PTPRC;QARS;ABI2;APC;CENPJ;FG…
