# Supplementary material for: Posttranslational Regulation of the Exon Skipping Machinery Controls Aberrant Splicing in Leukemia
Source: Oxford University Press journal article supplement (doi:10.1158/2159-8290.cd-19-1436), 2020-05-22
Supplement: 21598290cd191436-sup-233605_2_supp_6303804_q9k89h.xlsx [file 21598290cd191436-sup-233605_2_supp_6303804_q9k89h.xlsx]

## Sheet: Sheet1
Supplementary Table 10. Mutation Status of Selected Splicing Factors in T-ALL patients.
					Other known mutations
	Sample Name	Targeted sequencing: SF genetic status	RNA-Sequencing: Fene expression and splicing analysis		NOTCH1	PTEN	FBXW7
	Patient samples
	P1	MUT: SRSF7 (chr2:38750174, Asn17Tyr)	+
	P2	WT	+
	P3	WT	+
	Diagnostic NHR								Splicing Factor Genes Sequenced
	NHR1	WT	+		MUT	WT	MUT		SF3A1
	NHR2	WT	+		MUT	WT			SF3A3
	NHR3	WT	+						SF3B1
	NHR19	WT	+		WT	WT			SF3B2
	NHR5	WT	+		WT	WT			SF3B3
	NHR6	WT	+		MUT	WT			SRSF1
	NHR7	WT	+		MUT	WT			SRSF2
	NHR8	WT	+						SRSF3
	NHR9	WT	+		WT	MUT and DEL	WT		SRSF4
	NHR10	WT	+		MUT	WT			SRSF5
									SRSF6
	Diagnostic HR								SRSF7
	HR11	WT	+		WT	WT	WT		SRSF8
	HR12	WT	-		WT	WT	WT		SRSF9
	HR13	WT	-		WT	WT	WT		SRSF10
	HR14	WT	+		MUT	WT	MUT		SRSF11
	HR15	WT	-						SRSF12
	HR16	WT	-		MUT	WT			U2AF1
	HR17	WT	+			WT			ZRSR2
	HR18	WT	+		WT	WT	WT		PRPF40B
	T-ALL	Age	Gender	MATURATION STAGE	Karyotype	Oncogenic aberration
	M106	6	F	Mature	t(11;14) (p13;q11)	LMO2, SIL-TAL1, CDKN2Ade,l RB1del, NOTCH1µ
