# Supplementary material for: Posttranslational Regulation of the Exon Skipping Machinery Controls Aberrant Splicing in Leukemia
Source: Oxford University Press journal article supplement (doi:10.1158/2159-8290.cd-19-1436), 2020-05-22
Supplement: 21598290cd191436-sup-233605_2_table_6303807_qyk6dn.xlsx [file 21598290cd191436-sup-233605_2_table_6303807_qyk6dn.xlsx]

## Sheet: Differentially_Ubi-protein_Info
Supplementary Table 12. Protein List and Enrichment Analysis of KGG-MS.
Protein name	Gene name	Molecular Weight	-LOG(P-value)*	Difference (P5091 VS. Control)**	*Minus log10 of p-value, the bigger the better
ATP-binding cassette sub-family D member 3	ABCD3	75 kDa	3.45448	1.87045	**Log2 fold changes for sample P5091 vs Control, Positive value is up in the P5091 group and negative value is up in the Control group. Consider >+-1 means 2 fold changes between comparison groups.
ATP-binding cassette sub-family E member 1	ABCE1	67 kDa	3.91814	3.08402
Long-chain-fatty-acid--CoA ligase 3	ACSL3	80 kDa	3.4236	1.35634
Actin, cytoplasmic 1	ACTB	42 kDa	8.54874	1.89262
Beta-actin-like protein 2	ACTBL2	42 kDa	1.82418	0.5
Actin, alpha cardiac muscle 1	ACTC1	42 kDa	5.89333	1.21732
Actin, cytoplasmic 2	ACTG1	42 kDa	8.13835	1.81364
Alpha-centractin	ACTR1A	43 kDa	4.80357	2.44018
Actin-related protein 2	ACTR2	45 kDa	2.62429	1.69391
Alcohol dehydrogenase class-3	ADH5	40 kDa	1.86674	1.46362
Proteasomal ubiquitin receptor ADRM1	ADRM1	42 kDa	3.19256	1.09675
S-adenosylhomocysteine hydrolase-like protein 1	AHCYL1	59 kDa	3.55314	1.61014
Ankyrin repeat domain-containing protein 13A	ANKRD13A	68 kDa	1.47899	-1.10028
Acidic leucine-rich nuclear phosphoprotein 32 family member E	ANP32E	31 kDa	4.81455	2.46223
Annexin A6	ANXA6	76 kDa	2.07256	1.73258
Rho GDP-dissociation inhibitor 2	ARHGDIB	23 kDa	5.80293	3.43733
Rho guanine nucleotide exchange factor 2	ARHGEF2	112 kDa	5.60894	2.87294
Armadillo repeat-containing protein 6	ARMC6	54 kDa	4.01775	2.09617
Actin-related protein 2/3 complex subunit 1B	ARPC1B	41 kDa	2.46817	1.18375
Bifunctional purine biosynthesis protein PURH	ATIC	65 kDa	2.85873	2.63495
Sarcoplasmic/endoplasmic reticulum calcium ATPase 2	ATP2A2	115 kDa	3.52613	1.62011
Sarcoplasmic/endoplasmic reticulum calcium ATPase 3	ATP2A3	114 kDa	6.92627	2.97991
V-type proton ATPase catalytic subunit A	ATP6V1A	68 kDa	1.57591	0.87244
Ataxin-10	ATXN10	53 kDa	2.05201	-0.770189
Ataxin-3	ATXN3	41 kDa	2.48418	-0.775892
Large proline-rich protein BAG6	BAG6	119 kDa	2.06419	1.52844
3-hydroxybutyrate dehydrogenase type 2	BDH2	27 kDa	2.77801	1.31736
BolA-like protein 2	BOLA2	10 kDa	5.36051	2.13978
Nucleosome-remodeling factor subunit BPTF	BPTF	338 kDa	1.62255	0.742445
Mitotic checkpoint protein BUB3	BUB3	37 kDa	1.79604	1.61007
Probable 18S rRNA (guanine-N(7))-methyltransferase	BUD23	32 kDa	1.99484	-0.666667
CAD protein	CAD	243 kDa	8.15645	3.78479
Calmodulin-1	CALM1	17 kDa	1.57689	0.741869
Adenylyl cyclase-associated protein 1	CAP1	52 kDa	1.82322	1.25865
Cell cycle and apoptosis regulator protein 2	CCAR2	103 kDa	2.30472	1.08198
T-complex protein 1 subunit beta	CCT2	57 kDa	2.04972	0.879714
T-complex protein 1 subunit gamma	CCT3	61 kDa	1.90368	0.748642
T-complex protein 1 subunit zeta	CCT6A	58 kDa	1.35659	1.10273
T-cell surface glycoprotein CD3 zeta chain	CD247	19 kDa	3.927	-1.61987
T-cell surface glycoprotein CD3 epsilon chain	CD3E	23 kDa	1.72859	-0.807676
CD81 antigen	CD81	26 kDa	1.70466	-0.859803
Cell division cycle protein 123 homolog	CDC123	39 kDa	1.64819	1.41732
Cyclin-dependent kinase 1	CDK1	34 kDa	2.15966	1.72827
Cyclin-dependent kinase 6	CDK6	37 kDa	2.39098	1.60489
CUGBP Elav-like family member 1	CELF1	52 kDa	4.95434	2.15848
Cilia- and flagella-associated protein 36	CFAP36	39 kDa	2.6002	-1.38805
Cofilin-1	CFL1	19 kDa	2.34939	0.516589
MICOS complex subunit MIC19	CHCHD3	26 kDa	6.80642	2.90556
Chitinase-3-like protein 2	CHI3L2	44 kDa	3.28515	-1.40081
Cysteine-rich hydrophobic domain-containing protein 2	CHIC2	19 kDa	2.59544	-2.47672
Probable cytosolic iron-sulfur protein assembly protein CIAO1	CIAO1	38 kDa	1.3779	1.05049
Chloride intracellular channel protein 1	CLIC1	27 kDa	2.37845	0.827631
Clathrin interactor 1	CLINT1	68 kDa	4.02582	-2.11904
Calponin-2	CNN2	34 kDa	4.72708	2.15047
2',3'-cyclic-nucleotide 3'-phosphodiesterase	CNP	48 kDa	1.65816	-1.0766
Catechol O-methyltransferase	COMT	30 kDa	5.82778	2.54943
Coatomer subunit gamma-1	COPG1	98 kDa	2.3586	1.01581
COP9 signalosome complex subunit 8	COPS8	23 kDa	3.4016	-1.19529
Coronin-1A	CORO1A	51 kDa	5.03818	2.35309
Cytochrome c oxidase assembly protein COX11, mitochondrial	COX11	31 kDa	5.60341	3.06884
Copine-1	CPNE1	59 kDa	1.82836	0.619731
Cold shock domain-containing protein E1	CSDE1	89 kDa	1.98997	1.62581
Casein kinase II subunit beta	CSNK2B	25 kDa	1.42093	-1.25177
Cleavage stimulation factor subunit 2 tau variant	CSTF2T	64 kDa	1.65013	-1.49489
CTP synthase 1	CTPS1	67 kDa	3.65295	1.84614
Protein CutA	CUTA	19 kDa	2.20654	-1.53584
Peptidyl-prolyl cis-trans isomerase CWC27 homolog	CWC27	54 kDa	1.86959	0.925392
DDB1- and CUL4-associated factor 5	DCAF5	104 kDa	1.42176	-1.08882
Deoxycytidine kinase	DCK	31 kDa	6.75095	3.37227
Dynactin subunit 1	DCTN1	142 kDa	2.49633	1.11883
Protein DDI1 homolog 2	DDI2	45 kDa	1.99712	1.49621
DNA damage-inducible transcript 4 protein	DDIT4	25 kDa	3.38363	-1.63258
ATP-dependent RNA helicase DDX18	DDX18	75 kDa	1.66333	0.642716
ATP-dependent RNA helicase DDX39A	DDX39A	49 kDa	3.56628	2.80324
ATP-dependent RNA helicase DDX3X	DDX3X	73 kDa	7.23152	3.77602
Probable ATP-dependent RNA helicase DDX47	DDX47	51 kDa	4.36372	1.6951
Probable ATP-dependent RNA helicase DDX5	DDX5	69 kDa	6.95711	3.9361
ATP-dependent RNA helicase A	DHX9	141 kDa	6.1661	4.097
Disco-interacting protein 2 homolog B	DIP2B	171 kDa	1.62186	-2.28428
Exosome complex exonuclease RRP44	DIS3	109 kDa	2.70224	1.43991
Dihydrolipoyllysine-residue succinyltransferase component of 2-oxoglutarate dehydrogenase complex, mitochondrial	DLST	49 kDa	3.69159	1.6871
DNA (cytosine-5)-methyltransferase 1	DNMT1	183 kDa	2.0465	0.68866
Dedicator of cytokinesis protein 2	DOCK2	212 kDa	4.75698	2.44305
Destrin	DSTN	19 kDa	2.61947	1.04349
Cytoplasmic dynein 1 heavy chain 1	DYNC1H1	532 kDa	1.33322	1.27293
Dynein light chain 1, cytoplasmic	DYNLL1	10 kDa	2.17724	1.37976
Dynein light chain roadblock-type 1	DYNLRB1	11 kDa	3.24984	-1.15414
Elongation factor 1-alpha 1	EEF1A1	50 kDa	4.03456	0.988738
Elongation factor 1-gamma	EEF1G	50 kDa	2.168	1.69763
Elongation factor 2	EEF2	95 kDa	5.53387	2.15909
Eukaryotic translation initiation factor 2 subunit 2	EIF2S2	38 kDa	3.17771	-1.86368
Eukaryotic translation initiation factor 3 subunit A	EIF3A	167 kDa	2.05262	-1.67467
Eukaryotic translation initiation factor 3 subunit F	EIF3F	38 kDa	3.32188	1.43686
Eukaryotic translation initiation factor 3 subunit I	EIF3I	37 kDa	3.17636	1.46896
Eukaryotic initiation factor 4A-I	EIF4A1	46 kDa	6.57773	2.15364
Eukaryotic initiation factor 4A-II	EIF4A2	46 kDa	2.76453	2.52422
Eukaryotic initiation factor 4A-III	EIF4A3	47 kDa	5.27471	2.53554
Eukaryotic translation initiation factor 4 gamma 2	EIF4G2	102 kDa	5.1982	2.4467
ELAV-like protein 1	ELAVL1	36 kDa	5.46376	3.95816
Engulfment and cell motility protein 1	ELMO1	84 kDa	3.00682	1.63109
Elongin-B	ELOB	13 kDa	3.40374	1.68429
Alpha-enolase	ENO1	47 kDa	1.60115	-0.640055
Epidermal growth factor receptor substrate 15	EPS15	99 kDa	2.43338	-1.52688
Extended synaptotagmin-1	ESYT1	123 kDa	5.61421	2.61507
Ethanolamine kinase 1	ETNK1	51 kDa	1.51146	-0.797873
FAS-associated factor 1	FAF1	74 kDa	3.80296	1.8832
FAS-associated factor 2	FAF2	53 kDa	2.60384	1.10731
Protein FAM160B1	FAM160B1	87 kDa	1.74055	0.760653
Fanconi anemia group D2 protein	FANCD2	164 kDa	1.61305	-1.08384
Fanconi anemia group I protein	FANCI	149 kDa	6.08963	-2.66191
rRNA 2'-O-methyltransferase fibrillarin	FBL	34 kDa	1.37342	1.28565
Farnesyl pyrophosphate synthase	FDPS	48 kDa	1.38245	-1.31607
Flap endonuclease 1	FEN1	43 kDa	2.50133	2.0774
Fermitin family homolog 3	FERMT3	76 kDa	3.92216	2.47625
Peptidyl-prolyl cis-trans isomerase FKBP4	FKBP4	52 kDa	1.90933	0.861654
Peptidyl-prolyl cis-trans isomerase FKBP8	FKBP8	45 kDa	5.74216	2.18139
Filamin-A	FLNA	281 kDa	1.68251	0.908308
Far upstream element-binding protein 3	FUBP3	62 kDa	1.79479	0.725944
Fragile X mental retardation syndrome-related protein 1	FXR1	70 kDa	3.8488	2.14916
Ras GTPase-activating protein-binding protein 1	G3BP1	52 kDa	3.85244	1.81072
Trifunctional purine biosynthetic protein adenosine-3	GART	108 kDa	7.02065	4.70057
eIF-2-alpha kinase activator GCN1	GCN1	293 kDa	1.93719	1.07829
Rab GDP dissociation inhibitor beta	GDI2	51 kDa	1.66993	-1.52381
Glutamine synthetase	GLUL	42 kDa	1.62393	-1.10762
Glia maturation factor gamma	GMFG	17 kDa	1.36519	1.29248
GMP synthase [glutamine-hydrolyzing]	GMPS	77 kDa	2.07844	1.08198
Guanine nucleotide-binding protein subunit alpha-15	GNA15	44 kDa	3.43546	-1.15233
Guanine nucleotide-binding protein G(q) subunit alpha	GNAQ	42 kDa	1.50821	-1.42811
Guanine nucleotide-binding protein G(I)/G(S)/G(T) subunit beta-1	GNB1	37 kDa	3.20893	2.2336
Guanine nucleotide-binding protein G(I)/G(S)/G(O) subunit gamma-2	GNG2	8 kDa	2.85107	-1.71604
COP9 signalosome complex subunit 1	GPS1	56 kDa	1.40657	1.10155
Glutathione S-transferase P	GSTP1	23 kDa	5.50511	3.37796
Glycophorin-C	GYPC	14 kDa	2.43271	-1.31038
Core histone macro-H2A.1	H2AFY	40 kDa	1.97978	-0.525334
Histone H3.3	H3F3A	15 kDa	1.5206	-1.10048
Vigilin	HDLBP	141 kDa	1.67435	1.18409
Protein HGH1 homolog	HGH1	42 kDa	1.5559	0.740715
Histone H1.3	HIST1H1D	22 kDa	1.54356	-0.729651
Histone H2A type 2-A	HIST2H2AA3	14 kDa	3.67467	-0.359311
Histone H2A type 2-C	HIST2H2AC	14 kDa	3.52255	-0.486001
3-hydroxy-3-methylglutaryl-coenzyme A reductase	HMGCR	97 kDa	2.17074	-1.36471
Heme oxygenase 2	HMOX2	36 kDa	2.0904	1.55182
Heterogeneous nuclear ribonucleoprotein A0	HNRNPA0	31 kDa	6.60113	2.71653
Heterogeneous nuclear ribonucleoprotein A1	HNRNPA1	39 kDa	5.82278	3.77257
Heterogeneous nuclear ribonucleoproteins A2/B1	HNRNPA2B1	37 kDa	6.28953	2.70244
Heterogeneous nuclear ribonucleoprotein A3	HNRNPA3	40 kDa	5.97069	2.87959
Heterogeneous nuclear ribonucleoproteins C1/C2	HNRNPC	34 kDa	3.91944	2.14437
Heterogeneous nuclear ribonucleoprotein F	HNRNPF	46 kDa	4.15676	3.26431
Heterogeneous nuclear ribonucleoprotein H	HNRNPH1	49 kDa	5.68523	3.97284
Heterogeneous nuclear ribonucleoprotein H2	HNRNPH2	49 kDa	7.92184	4.1357
Heterogeneous nuclear ribonucleoprotein H3	HNRNPH3	37 kDa	9.21074	3.32391
Heterogeneous nuclear ribonucleoprotein K	HNRNPK	51 kDa	5.81127	1.47818
Heterogeneous nuclear ribonucleoprotein L	HNRNPL	64 kDa	4.88454	3.07862
Heterogeneous nuclear ribonucleoprotein M	HNRNPM	78 kDa	8.38714	4.66928
Heterogeneous nuclear ribonucleoprotein R	HNRNPR	71 kDa	4.17308	3.55385
Heterogeneous nuclear ribonucleoprotein U	HNRNPU	91 kDa	5.93711	3.85216
Heterogeneous nuclear ribonucleoprotein U-like protein 1	HNRNPUL1	96 kDa	3.02694	2.01473
3-hydroxyacyl-CoA dehydrogenase type-2	HSD17B10	27 kDa	2.40211	1.83459
Heat shock protein HSP 90-alpha	HSP90AA1	85 kDa	3.48049	1.10193
Heat shock protein HSP 90-beta	HSP90AB1	83 kDa	5.27918	1.60134
Heat shock 70 kDa protein 14	HSPA14	55 kDa	4.86164	2.63154
Heat shock protein 105 kDa	HSPH1	97 kDa	9.48808	4.58549
Isocitrate dehydrogenase [NADP], mitochondrial	IDH2	51 kDa	4.08393	2.06887
Immediate early response 3-interacting protein 1	IER3IP1	9 kDa	1.52734	-0.991396
Gamma-interferon-inducible protein 16	IFI16	88 kDa	3.59097	2.18445
Interferon-induced transmembrane protein 1	IFITM1	14 kDa	3.29943	-1.66483
Interferon gamma receptor 1	IFNGR1	54 kDa	3.23481	-1.00464
Insulin-like growth factor 2 mRNA-binding protein 1	IGF2BP1	63 kDa	3.47052	2.5835
Insulin-like growth factor 2 mRNA-binding protein 3	IGF2BP3	64 kDa	5.82877	2.51524
Interleukin enhancer-binding factor 2	ILF2	43 kDa	4.34192	2.15077
Acetolactate synthase-like protein	ILVBL	68 kDa	2.03344	0.951089
MICOS complex subunit MIC60	IMMT	84 kDa	8.19196	3.82185
Integrator complex subunit 7	INTS7	107 kDa	4.23228	-1.99975
Importin-4	IPO4	119 kDa	3.09441	1.45739
Ubiquitin-like protein ISG15	ISG15	18 kDa	3.52522	2.46617
Integrin beta-1	ITGB1	88 kDa	3.28142	-1.48032
Integral membrane protein 2B	ITM2B	30 kDa	1.9019	-0.886988
Inosine triphosphate pyrophosphatase	ITPA	21 kDa	6.88856	2.37151
Voltage-gated potassium channel subunit beta-2	KCNAB2	41 kDa	4.05391	-2.63419
Kinesin-like protein KIF2C	KIF2C	81 kDa	2.5936	1.21409
DNA/RNA-binding protein KIN17	KIN	45 kDa	4.37024	2.22379
Kin of IRRE-like protein 1	KIRREL1	84 kDa	1.69592	-1.31414
Importin subunit alpha-1	KPNA2	58 kDa	5.01403	3.09606
Importin subunit beta-1	KPNB1	97 kDa	3.06723	2.1674
Cytosol aminopeptidase	LAP3	56 kDa	2.87574	1.37093
Tyrosine-protein kinase Lck	LCK	58 kDa	4.39609	1.94363
L-lactate dehydrogenase A chain	LDHA	37 kDa	4.80847	-2.99499
DNA ligase 1	LIG1	102 kDa	2.1761	1.25635
Lamin-B1	LMNB1	66 kDa	5.35185	2.03812
Lamin-B2	LMNB2	70 kDa	3.8137	1.98137
Low-density lipoprotein receptor-related protein 12	LRP12	95 kDa	3.42646	-1.88752
Protein LSM14 homolog A	LSM14A	51 kDa	1.63628	1.13244
Lanosterol synthase	LSS	83 kDa	3.02813	-1.05664
Dual specificity mitogen-activated protein kinase kinase 2	MAP2K2	44 kDa	4.01731	2.27698
Mitogen-activated protein kinase kinase kinase 1	MAP3K1	164 kDa	3.89565	1.72969
Mitogen-activated protein kinase 14	MAPK14	41 kDa	2.25284	1.68944
S-adenosylmethionine synthase isoform type-2	MAT2A	44 kDa	5.19409	2.99292
Matrin-3	MATR3	95 kDa	4.0955	2.4173
DNA replication licensing factor MCM2	MCM2	102 kDa	1.68805	0.969561
DNA replication licensing factor MCM4	MCM4	97 kDa	1.39197	1.19499
DNA replication licensing factor MCM6	MCM6	93 kDa	5.37605	2.31403
DNA replication licensing factor MCM7	MCM7	81 kDa	2.70817	0.883201
Methionine aminopeptidase 1	METAP1	43 kDa	2.95481	1.62046
Methylated-DNA--protein-cysteine methyltransferase	MGMT	22 kDa	4.01354	1.21243
E3 ubiquitin-protein ligase MIB1	MIB1	110 kDa	5.56369	-1.63587
Protein Mis18-alpha	MIS18A	26 kDa	1.36783	-1.18061
Cytochrome c oxidase subunit 2	MT-CO2	26 kDa	2.91116	1.30473
C-1-tetrahydrofolate synthase, cytoplasmic	MTHFD1	102 kDa	7.50674	3.02043
Myosin-9	MYH9	227 kDa	2.23109	1.05511
Myosin light polypeptide 6	MYL6	17 kDa	2.28396	0.794731
Unconventional myosin-Ib	MYO1B	132 kDa	1.85383	-1.73314
Unconventional myosin-Ig	MYO1G	116 kDa	6.64328	4.43018
Marginal zone B- and B1-cell-specific protein	MZB1	21 kDa	2.4334	-1.59325
N-alpha-acetyltransferase 50	NAA50	19 kDa	2.87025	-1.74295
Next to BRCA1 gene 1 protein	NBR1	107 kDa	4.00932	-1.93527
Nucleolin	NCL	77 kDa	7.00551	4.14512
NEDD4 family-interacting protein 1	NDFIP1	25 kDa	3.84967	-2.28155
NADH dehydrogenase [ubiquinone] 1 alpha subcomplex subunit 8	NDUFA8	20 kDa	7.5958	3.79153
NEDD8	NEDD8	9 kDa	3.93064	1.7587
Non-POU domain-containing octamer-binding protein	NONO	54 kDa	6.98236	3.745
Vesicle-fusing ATPase	NSF	83 kDa	1.38353	0.979141
NSFL1 cofactor p47	NSFL1C	41 kDa	2.90731	0.930827
N-terminal Xaa-Pro-Lys N-methyltransferase 1	NTMT1	25 kDa	3.96839	1.90983
Cancer-related nucleoside-triphosphatase	NTPCR	21 kDa	1.453	0.752257
Cytosolic Fe-S cluster assembly factor NUBP2	NUBP2	29 kDa	2.92812	1.15222
NudC domain-containing protein 2	NUDCD2	18 kDa	4.50946	1.99254
Cleavage and polyadenylation specificity factor subunit 5	NUDT21	26 kDa	1.30405	1.06221
Oxysterol-binding protein-related protein 8	OSBPL8	101 kDa	1.77172	0.831891
Serine/threonine-protein kinaseR1	OXSR1	58 kDa	2.38482	0.746376
Proliferation-associated protein 2G4	PA2G4	44 kDa	7.31467	3.71219
Polyadenylate-binding protein 1	PABPC1	71 kDa	4.41233	3.86711
Polyadenylate-binding protein 4	PABPC4	71 kDa	6.79908	3.85265
Polyadenylate-binding protein 2	PABPN1	33 kDa	1.86804	1.30947
Serine/threonine-protein kinase PAK 2	PAK2	58 kDa	3.7582	2.66868
Bifunctional 3'-phosphoadenosine 5'-phosphosulfate synthase 1	PAPSS1	71 kDa	1.95718	-1.24821
Protein PAT1 homolog 1	PATL1	87 kDa	1.50928	0.7693
Poly(rC)-binding protein 1	PCBP1	37 kDa	3.85675	2.06601
Poly(rC)-binding protein 2	PCBP2	39 kDa	4.84459	3.17065
Pericentriolar material 1 protein	PCM1	229 kDa	2.71515	-1.98371
6-phosphofructo-2-kinase/fructose-2,6-bisphosphatase 3	PFKFB3	60 kDa	3.846	-1.23613
Phosphoglycerate kinase 1	PGK1	45 kDa	2.69425	-1.52193
D-3-phosphoglycerate dehydrogenase	PHGDH	57 kDa	12.031	4.64693
Phosphatidylinositol 4-phosphate 3-kinase C2 domain-containing subunit beta	PIK3C2B	185 kDa	2.52681	-1.55062
Phosphatidylinositol 4-phosphate 5-kinase type-1 gamma	PIP5K1C	73 kDa	2.08845	-1.49768
1-phosphatidylinositol 4,5-bisphosphate phosphodiesterase gamma-1	PLCG1	149 kDa	1.93697	-0.687671
Serine/threonine-protein kinase PLK1	PLK1	68 kDa	1.68751	0.727175
Protein PML	PML	98 kDa	1.42027	-1.06922
Paraneoplastic antigen Ma2	PNMA2	42 kDa	1.56631	-0.701203
DNA polymerase delta subunit 3	POLD3	51 kDa	1.81039	0.834797
DNA-directed RNA polymerase II subunit RPB2	POLR2B	134 kDa	2.46861	-1.3189
DNA-directed RNA polymerases I, II, and III subunit RPABC3	POLR2H	17 kDa	1.64093	0.853905
Peptidyl-prolyl cis-trans isomerase A	PPIA	18 kDa	4.88962	2.45634
Peptidyl-prolyl cis-trans isomerase D	PPID	41 kDa	2.16723	0.729066
Serine/threonine-protein phosphatase PP1-alpha catalytic subunit	PPP1CA	38 kDa	2.18615	1.99567
Nuclear inhibitor of protein phosphatase 1	PPP1R8	38 kDa	3.40293	1.04129
Serine/threonine-protein phosphatase 2A 65 kDa regulatory subunit A beta isoform	PPP2R1B	66 kDa	2.72335	2.55872
Serine/threonine-protein phosphatase 6 catalytic subunit	PPP6C	35 kDa	5.16601	1.87837
Peroxiredoxin-1	PRDX1	22 kDa	4.32186	2.48347
Protein kinase C eta type	PRKCH	78 kDa	4.99843	-2.0902
DNA-dependent protein kinase catalytic subunit	PRKDC	469 kDa	6.07108	3.80311
Pre-mRNA-processing-splicing factor 8	PRPF8	274 kDa	2.3553	-1.20267
Proteasome subunit alpha type-5	PSMA5	26 kDa	2.73913	1.90365
Proteasome subunit beta type-2	PSMB2	23 kDa	1.66028	0.964293
26S proteasome regulatory subunit 4	PSMC1	49 kDa	1.40505	-0.984482
26S proteasome regulatory subunit 6B	PSMC4	47 kDa	1.68056	1.14192
26S proteasome non-ATPase regulatory subunit 2	PSMD2	100 kDa	3.71707	-1.19343
26S proteasome non-ATPase regulatory subunit 3	PSMD3	61 kDa	2.14653	-1.49811
Polypyrimidine tract-binding protein 1	PTBP1	57 kDa	1.99619	1.23024
Prostaglandin E synthase 3	PTGES3	19 kDa	1.36223	1.32179
Tyrosine-protein phosphatase non-receptor type 14	PTPN14	135 kDa	2.74309	-1.32842
Tyrosine-protein phosphatase non-receptor type 6	PTPN6	68 kDa	2.95386	1.61683
Glutamine--tRNA ligase	QARS	88 kDa	1.66028	0.780052
Ras-related protein Rab-11B	RAB11B	24 kDa	1.53607	-1.03563
Ras-related protein Rab-14	RAB14	24 kDa	1.37683	-1.14567
Ras-related protein Rab-2A	RAB2A	24 kDa	2.60395	-1.27945
Ras-related protein Rab-7a	RAB7A	23 kDa	2.41496	-0.940643
Receptor of activated protein C kinase 1	RACK1	35 kDa	2.51258	0.416253
E3 ubiquitin-protein ligase RAD18	RAD18	56 kDa	2.07757	-0.702387
UV excision repair protein RAD23 homolog A	RAD23A	40 kDa	3.15206	-0.460878
UV excision repair protein RAD23 homolog B	RAD23B	43 kDa	1.76641	-0.71925
RNA-binding protein Raly	RALY	32 kDa	2.99962	1.76764
Ran-specific GTPase-activating protein	RANBP1	23 kDa	2.29017	1.0492
Ras GTPase-activating protein 2	RASA2	97 kDa	2.22674	-1.13332
Retinoblastoma-associated protein	RB1	106 kDa	5.90183	2.59159
RNA-binding protein 4	RBM4	40 kDa	1.8578	0.861654
Retinol dehydrogenase 11	RDH11	35 kDa	4.60231	1.79792
Replication factor C subunit 2	RFC2	39 kDa	4.0214	1.73248
E3 ubiquitin-protein ligase RNF13	RNF13	43 kDa	2.83698	-1.4107
E3 ubiquitin-protein ligase RNF168	RNF168	65 kDa	2.49611	-1.16693
E3 ubiquitin-protein ligase RNF213	RNF213	591 kDa	3.57069	2.5683
E3 ubiquitin-protein ligase BRE1B	RNF40	114 kDa	1.47686	0.819501
Ribonuclease inhibitor	RNH1	50 kDa	1.53772	-0.694987
60S ribosomal protein L22	RPL22	15 kDa	3.39115	1.7779
60S ribosomal protein L24	RPL24	18 kDa	4.01554	-1.83815
60S ribosomal protein L3	RPL3	46 kDa	3.37117	1.54093
60S acidic ribosomal protein P0	RPLP0	34 kDa	7.69239	2.11737
40S ribosomal protein S12	RPS12	15 kDa	4.50566	2.29541
40S ribosomal protein S17	RPS17	16 kDa	2.15729	-1.09749
40S ribosomal protein S24	RPS24	15 kDa	3.24399	1.02832
40S ribosomal protein S3	RPS3	27 kDa	2.91835	-0.706619
40S ribosomal protein S5	RPS5	23 kDa	3.42558	2.29118
40S ribosomal protein S8	RPS8	24 kDa	1.45406	0.917334
40S ribosomal protein SA	RPSA	33 kDa	4.77326	2.3015
Ribosomal RNA processing protein 1 homolog A	RRP1	53 kDa	2.659	1.27623
tRNA-splicing ligase RtcB homolog	RTCB	55 kDa	4.39839	2.41652
RNA transcription, translation and transport factor protein	RTRAF	28 kDa	3.60092	2.42064
Splicing factor, arginine/serine-rich 19	SCAF1	139 kDa	1.71666	-0.933247
Secretory carrier-associated membrane protein 3	SCAMP3	38 kDa	1.47582	-1.17947
Nucleoporin SEH1	SEH1L	40 kDa	1.49068	-0.962455
Septin-1	SEPT1	42 kDa	3.66496	1.3005
Septin-6	SEPT6	50 kDa	3.02524	1.83837
Septin-9	SEPT9	65 kDa	3.70345	2.68113
Splicing factor 3B subunit 5	SF3B5	10 kDa	2.59146	-0.927595
Splicing factor, proline- and glutamine-rich	SFPQ	76 kDa	5.74846	2.56623
SH2 domain-containing protein 1A	SH2D1A	14 kDa	1.39059	-0.839665
Mitochondrial 2-oxoglutarate/malate carrier protein	SLC25A11	34 kDa	3.32217	1.26915
Equilibrative nucleoside transporter 1	SLC29A1	50 kDa	1.89906	-1.31276
Solute carrier family 2, facilitated glucose transporter member 1	SLC2A1	54 kDa	2.16431	-1.33938
Sodium-coupled neutral amino acid transporter 2	SLC38A2	56 kDa	1.67779	-0.792481
Structural maintenance of chromosomes protein 1A	SMC1A	143 kDa	1.88949	-0.717859
Structural maintenance of chromosomes protein 2	SMC2	136 kDa	2.37665	1.32626
Staphylococcal nuclease domain-containing protein 1	SND1	102 kDa	4.24473	2.37853
Small nuclear ribonucleoprotein Sm D3	SNRPD3	14 kDa	3.44141	2.15282
Small nuclear ribonucleoprotein-associated protein N	SNRPN	25 kDa	3.64886	1.90995
Serrate RNA effector molecule homolog	SRRT	101 kDa	2.41342	1.41197
Serine/arginine-rich splicing factor 6	SRSF6	40 kDa	1.51139	1.08028
Sjoegren syndrome/scleroderma autoantigen 1	SSSCA1	21 kDa	5.0757	-1.13966
Signal transducer and activator of transcription 1-alpha/beta	STAT1	87 kDa	1.69889	1.04002
Serine/threonine-protein kinase 26	STK26	47 kDa	3.3286	1.58248
Syntaxin-7	STX7	30 kDa	2.12152	-1.00664
Protein SGT1 homolog	SUGT1	41 kDa	1.74714	0.666667
Small ubiquitin-related modifier 4	SUMO4	11 kDa	1.86263	-0.910812
Heterogeneous nuclear ribonucleoprotein Q	SYNCRIP	70 kDa	2.0952	1.23014
Transgelin-2	TAGLN2	22 kDa	3.37984	1.79218
Transaldolase	TALDO1	38 kDa	2.48169	1.82233
TRAF family member-associated NF-kappa-B activator	TANK	48 kDa	2.41583	-1.17105
TAR DNA-binding protein 43	TARDBP	45 kDa	5.78434	3.68154
Tax1-binding protein 1	TAX1BP1	91 kDa	1.83304	-0.891879
Transcription elongation factor A protein-like 2	TCEAL2	26 kDa	1.74018	-0.806184
Transcription elongation factor A protein-like 4	TCEAL4	25 kDa	1.93002	-1.02832
T-complex protein 1 subunit alpha	TCP1	60 kDa	3.72078	2.5478
Mitochondrial import inner membrane translocase subunit TIM50	TIMM50	40 kDa	3.34331	1.63189
Mitochondrial import inner membrane translocase subunit Tim9	TIMM9	10 kDa	3.79912	1.5646
Calcium load-activated calcium channel	TMCO1	21 kDa	2.10441	-1.4134
Transmembrane protein 209	TMEM209	63 kDa	1.75419	-1.14731
Transportin-3	TNPO3	104 kDa	2.97986	1.57922
Target of Myb protein 1	TOM1	54 kDa	2.64156	-1.61861
Tropomyosin alpha-4 chain	TPM4	29 kDa	2.94809	1.42411
Transformer-2 protein homolog beta	TRA2B	34 kDa	1.96519	-1.0116
TNF receptor-associated factor 4	TRAF4	54 kDa	2.01895	-0.657922
Transcription intermediary factor 1-beta	TRIM28	89 kDa	3.20431	2.75053
Tubulin--tyrosine ligase-like protein 12	TTLL12	74 kDa	9.2574	3.23079
Tubulin alpha-1A chain	TUBA1A	50 kDa	6.61378	2.05499
Tubulin alpha-1B chain	TUBA1B	50 kDa	6.74689	2.13413
Tubulin alpha-1C chain	TUBA1C	50 kDa	5.72987	1.76301
Tubulin beta chain	TUBB	50 kDa	7.83815	2.11607
Tubulin beta-2B chain	TUBB2B	50 kDa	6.50826	2.27462
Tubulin beta-3 chain	TUBB3	50 kDa	10.7505	4.09638
Tubulin beta-4B chain	TUBB4B	50 kDa	7.79078	2.5553
Tubby-related protein 3	TULP3	50 kDa	1.41369	-0.871439
Thioredoxin domain-containing protein 17	TXNDC17	14 kDa	3.55636	1.98505
Thioredoxin-like protein 1	TXNL1	32 kDa	1.58876	0.723308
Splicing factor U2AF 35 kDa subunit	U2AF1	28 kDa	3.03546	1.86625
Ubiquitin-like modifier-activating enzyme 1	UBA1	118 kDa	4.8641	0.781177
Ubiquitin-like modifier-activating enzyme 5	UBA5	45 kDa	2.26524	1.27898
Ubiquitin-associated protein 2-like	UBAP2L	115 kDa	1.54253	0.871557
Ubiquitin-associated and SH3 domain-containing protein A	UBASH3A	74 kDa	1.36973	-1.18091
Ubiquitin-conjugating enzyme E2 N	UBE2N	17 kDa	2.30985	0.495667
Uridine 5'-monophosphate synthase	UMPS	52 kDa	1.75195	1.05436
Protein unc-13 homolog D	UNC13D	123 kDa	4.70219	2.32602
Ubiquitin carboxyl-terminal hydrolase 14	USP14	56 kDa	4.08972	1.78571
Ubiquitin carboxyl-terminal hydrolase 20	USP20	102 kDa	3.04379	-1.13858
Ubiquitin carboxyl-terminal hydrolase 7	USP7	128 kDa	1.48156	-1.07138
Probable ubiquitin carboxyl-terminal hydrolase FAF-X	USP9X	292 kDa	1.80759	-0.839292
U3 small nucleolar RNA-associated protein 18 homolog	UTP18	62 kDa	1.87962	-0.76416
Proto-oncogene vav	VAV1	98 kDa	1.43514	1.39179
Vimentin	VIM	54 kDa	5.22581	2.54819
Very low-density lipoprotein receptor	VLDLR	96 kDa	2.68903	-1.54609
Serine/threonine-protein kinase VRK1	VRK1	45 kDa	5.82424	2.64593
Vesicle transport through interaction with t-SNAREs homolog 1B	VTI1B	27 kDa	2.0917	0.963671
WD repeat-containing protein 1	WDR1	66 kDa	4.1276	1.88816
ATPase WRNIP1	WRNIP1	72 kDa	3.1782	-2.19482
DNA repair protein complementing XP-C cells	XPC	106 kDa	2.70837	-1.52482
Exportin-1	XPO1	123 kDa	5.25199	2.59621
X-ray repair cross-complementing protein 5	XRCC5	83 kDa	6.40513	2.86882
X-ray repair cross-complementing protein 6	XRCC6	70 kDa	5.44045	2.48565
Tyrosine--tRNA ligase, cytoplasmic	YARS	59 kDa	3.86014	1.66288
Nuclease-sensitive element-binding protein 1	YBX1	36 kDa	1.34662	-1.22528
Tyrosine-protein kinase ZAP-70	ZAP70	70 kDa	1.55651	0.641274
Zinc finger CCCH-type antiviral protein 1	ZC3HAV1	101 kDa	4.76085	2.23299
AN1-type zinc finger protein 2B	ZFAND2B	28 kDa	1.34196	-0.886988
E3 SUMO-protein ligase ZNF451	ZNF451	121 kDa	3.65249	-1.41531
E3 ubiquitin-protein ligase ZNRF1	ZNRF1	24 kDa	4.10373	-2.46365

## Sheet: Identified_Ubi-peptide_Sequence
Protein name	Gene name	Identified ubiquitinated peptide sequence
ATP-binding cassette sub-family D member 3	ABCD3	LITNSEEIAFYNGNKR
		SGANVLICGPNGCGKSSLFR
		EGGWDSVQDWMDVLSGGEKQR
ATP-binding cassette sub-family E member 1	ABCE1	DASLVFKVAETANEEEVKK
		QKPNLGKYDDPPDWQEILTYFR
		TQAIVCQQLDLTHLKER
		IRDAYTHPQFVTDVMKPLQIENIIDQEVQTLSGGELQR
		VIVFDGVPSKNTVANSPQTLLAGMNK
		GSELQNYFTKILEDDLK
		NTVANSPQTLLAGMNKFLSQLEITFR
Long-chain-fatty-acid--CoA ligase 3	ACSL3	LQAGEYVSLGKVEAALK
		WLCTGDIGEFEPDGCLKIIDR
		VLSEAAISASLEKFEIPVKIR
Actin, cytoplasmic 1	ACTB	CPEALFQPSFLGMESCGIHETTFNSIMKCDVDIR
		CPEALFQPSFLGMESCGIHETTFNSIMKCDVDIRK
		DLTDYLMKILTER
		EITALAPSTMKIK
		EKLCYVALDFEQEMATAASSSSLEK
		HQGVMVGMGQKDSYVGDEAQSK
		HQGVMVGMGQKDSYVGDEAQSKR
		KDLYANTVLSGGTTMYPGIADR
		LCYVALDFEQEMATAASSSSLEKSYELPDGQVITIGNER
		VAPEEHPVLLTEAPLNPKANR
		MQKEITALAPSTMK
		CPEALFQPSFLGMESCGIHETTFNSIMK
		YPIEHGIVTNWDDMEKIWHHTFYNELR
		DDDIAALVVDNGSGMCKAGFAGDDAPR
		DIKEKLCYVALDFEQEMATAASSSSLEK
		DSYVGDEAQSKR
		EITALAPSTMKIKIIAPPER
		EKLCYVALDFEQEMATAASSSSLEKSYELPDGQVITIGNER
		FRCPEALFQPSFLGMESCGIHETTFNSIMKCDVDIR
		FRCPEALFQPSFLGMESCGIHETTFNSIMKCDVDIRK
		IKIIAPPERK
		IKIIAPPER
		CDVDIRKDLYANTVLSGGTTMYPGIADR
Beta-actin-like protein 2	ACTBL2	DLTDYLMKILTER
		IKIIAPPERK
		IKIIAPPER
		MQKEIITLAPSTMKIK
Actin, alpha cardiac muscle 1	ACTC1	DLTDYLMKILTER
		EITALAPSTMKIK
		GILTLKYPIEHGIITNWDDMEK
		HQGVMVGMGQKDSYVGDEAQSK
		HQGVMVGMGQKDSYVGDEAQSKR
		LCYVALDFENEMATAASSSSLEKSYELPDGQVITIGNER
		YPIEHGIITNWDDMEKIWHHTFYNELR
		MQKEITALAPSTMK
		DSYVGDEAQSKR
		EITALAPSTMKIKIIAPPER
		EKLCYVALDFENEMATAASSSSLEKSYELPDGQVITIGNER
		GILTLKYPIEHGIITNWDDMEKIWHHTFYNELR
		IKIIAPPERK
		RGILTLKYPIEHGIITNWDDMEK
		IKIIAPPER
Actin, cytoplasmic 2	ACTG1	CPEALFQPSFLGMESCGIHETTFNSIMKCDVDIR
		CPEALFQPSFLGMESCGIHETTFNSIMKCDVDIRK
		DLTDYLMKILTER
		EITALAPSTMKIK
		EKLCYVALDFEQEMATAASSSSLEK
		HQGVMVGMGQKDSYVGDEAQSK
		HQGVMVGMGQKDSYVGDEAQSKR
		KDLYANTVLSGGTTMYPGIADR
		LCYVALDFEQEMATAASSSSLEKSYELPDGQVITIGNER
		VAPEEHPVLLTEAPLNPKANR
		MQKEITALAPSTMK
		CPEALFQPSFLGMESCGIHETTFNSIMK
		YPIEHGIVTNWDDMEKIWHHTFYNELR
		DIKEKLCYVALDFEQEMATAASSSSLEK
		DSYVGDEAQSKR
		EEEIAALVIDNGSGMCKAGFAGDDAPR
		EITALAPSTMKIKIIAPPER
		EKLCYVALDFEQEMATAASSSSLEKSYELPDGQVITIGNER
		FRCPEALFQPSFLGMESCGIHETTFNSIMKCDVDIR
		FRCPEALFQPSFLGMESCGIHETTFNSIMKCDVDIRK
		IKIIAPPERK
		IKIIAPPER
		CDVDIRKDLYANTVLSGGTTMYPGIADR
Alpha-centractin	ACTR1A	IWQYVYSKDQLQTFSEEHPVLLTEAPLNPR
		ACYLSINPQKDETLETEKAQYYLPDGSTIEIGPSR
		TLFSNIVLSGGSTLFKGFGDR
Actin-related protein 2	ACTR2	VLEKLGVTVR
		YLIKLLLLR
		VGNIEIKDLMVGDEASELR
		SEFYKHIVLSGGSTMYPGLPSR
		HLWDYTFGPEKLNIDTR
Alcohol dehydrogenase class-3	ADH5	AGDTVIPLYIPQCGECKFCLNPK
		LKAGDTVIPLYIPQCGECK
		CKAAVAWEAGKPLSIEEIEVAPPK
Proteasomal ubiquitin receptor ADRM1	ADRM1	GASNKYLVEFR
		GLVYIQQTDDSLIHFCWKDR
		MSLKGTTVTPDKR
		MSLKGTTVTPDK
		TSGNVEDDLIIFPDDCEFKR
S-adenosylhomocysteine hydrolase-like protein 1	AHCYL1	MKNSCIVCNMGHSNTEIDVTSLR
		QVDVVITCTGNKNVVTR
Ankyrin repeat domain-containing protein 13A	ANKRD13A	LEFPPGFPVKIEIPLFHVLNAR
		LTSPVINTSLDTKNIAFER
		SSACDAGDHYPLHLLVWKNDYR
		FDNDLQLAMELSAKELEEWELR
Acidic leucine-rich nuclear phosphoprotein 32 family member E	ANP32E	CPNLTYLNLSGNKIK
		NLKSLDLFNCEITNLEDYR
		DLSTVEALQNLKNLK
		KLELSDNIISGGLEVLAEKCPNLTYLNLSGNK
Annexin A6	ANXA6	TNEQMHQLVAAYKDAYER
		AMKGLGTDEDTIIDIITHR
		DAISGIGTDEKCLIEILASR
		DLMTDLKSEISGDLAR
		LVFDEYLKTTGKPIEASIR
		AINEAYKEDYHKSLEDALSSDTSGHFR
		DAFVAIVQSVKNKPLFFADK
		EDAQVAAEILEIADTPSGDKTSLETR
Rho GDP-dissociation inhibitor 2	ARHGDIB	LTLVCESAPGPITMDLTGDLEALKK
		VDKATFMVGSYGPRPEEYEFLTPVEEAPK
		ATFMVGSYGPRPEEYEFLTPVEEAPKGMLAR
		DIVSGLKYVQHTYR
		GTYHNKSFFTDDDKQDHLSWEWNLSIK
		LTLVCESAPGPITMDLTGDLEALKKETIVLK
		ETIVLKEGSEYR
		KTLLGDGPVVTDPKAPNVVVTR
		KTLLGDGPVVTDPK
		GTYHNKSFFTDDDKQDHLSWEWNLSIKK
		SLKELQEMDKDDESLIK
Rho guanine nucleotide exchange factor 2	ARHGEF2	SSLSLAKSVSTTNIAGHFNDESPLGLR
		ELLSNVDEGIYQLEKGAR
		LGDLLISQFSGPSAEQMCKTYSEFCSR
		DIANQEKGMFLISAAPPEMYEVHTASR
		EKVGLFAEMTHFQAEEDGGSGMALPTLPR
Armadillo repeat-containing protein 6	ARMC6	DQSGVQELVKQVLSTLR
		VLIEATKAFLDNPGILSELCGTLSR
Actin-related protein 2/3 complex subunit 1B	ARPC1B	AYHSFLVEPISCHAWNKDR
		ASSEGGTAAGAGLDSLHKNSVSQISVLSGGK
Bifunctional purine biosynthesis protein PURH	ATIC	YTQSNSVCYAKNGQVIGIGAGQQSR
		VKTLHPAVHAGILAR
		AEISNAIDQYVTGTIGEDEDLIKWK
		EVSDGIIAPGYEEEALTILSKK
		HVSPAGAAVGIPLSEDEAKVCMVYDLYK
		MSSFGDFVALSDVCDVPTAKIISR
		VVACNLYPFVKTVASPGVTVEEAVEQIDIGGVTLLR
		VCMVYDLYKTLTPISAAYAR
		SGVAYIAAPSGSAADKVVIEACDELGIILAHTNLR
		YGMNPHQTPAQLYTLQPKLPITVLNGAPGFINLCDALNAWQLVK
		APGQLALFSVSDKTGLVEFAR
Sarcoplasmic/endoplasmic reticulum calcium ATPase 2	ATP2A2	VIMITGDNKGTAVAICR
		IEVASSVKLCR
		IGIFGQDEDVTSKAFTGR
		SLPSVETLGCTSVICSDKTGTLTTNQMSVCR
		VGEATETALTCLVEKMNVFDTELK
		GVYEKVGEATETALTCLVEK
		KAEIGIAMGSGTAVAK
Sarcoplasmic/endoplasmic reticulum calcium ATPase 3	ATP2A3	VVMITGDNKGTAVAICR
		AVGVAVATGLHTELGKIR
		LGIFGDTEDVAGKAYTGR
		SLPSVETLGCTSVICSDKTGTLTTNQMSVCR
		VGEATETALTCLVEKMNVFDTDLQALSR
		GVYEKVGEATETALTCLVEK
		KAEIGIAMGSGTAVAK
		NFLKCSEDNPLFAGIDCEVFESR
V-type proton ATPase catalytic subunit A	ATP6V1A	TGKPLSVELGPGIMGAIFDGIQRPLSDISSQTQSIYIPR
Ataxin-10	ATXN10	ITSDEPLTKDDIPVFLR
		NLTEDNSQNQDLIAKMEEQGLADASLLK
		NLTEDNSQNQDLIAKMEEQGLADASLLKK
		TVLKLASEEPPDDEEALATIR
Ataxin-3	ATXN3	LIGEELAQLKEQR
		SFICNYKEHWFTVR
Large proline-rich protein BAG6	BAG6	LQEYNVGGKVIHLVER
		EHIAASVSIPSEKQR
		EFKEHIAASVSIPSEKQR
3-hydroxybutyrate dehydrogenase type 2	BDH2	AAVIGLTKSVAADFIQQGIR
		VIATDINESKLQELEKYPGIQTR
BolA-like protein 2	BOLA2	LVNACLAEELPHIHAFEQKTLTPDQWAR
		FEGKPLLQR
		VLVVSAKFEGKPLLQR
Nucleosome-remodeling factor subunit BPTF	BPTF	TETSETEITTTEIIKR
Mitotic checkpoint protein BUB3	BUB3	LKYQHTGAVLDCAFYDPTHAWSGGLDHQLK
		TPCNAGTFSQPEKVYTLSVSGDR
		AFPNKQGYVLSSIEGR
		VAVEYLDPSPEVQKK
		LNQPPEDGISSVKFSPNTSQFLLVSSWDTSVR
Probable 18S rRNA (guanine-N(7))-methyltransferase	BUD23	AGFSGGMVVDYPNSAKAK
CAD protein	CAD	CTKLFVEALGQIGPAPPLK
		GQPLPPDLLQQAKCLGFSDK
		LVQNGTEPSSLPFLDPNARPLVPEVSIKTPR
		NERPDGVLLTFGGQTALNCGVELTKAGVLAR
		NSVTGGTAAFEPSVDYCVVKIPR
		ILALDCGLKYNQIR
		SFPFVSKTLGVDLVALATR
		VIMGEEVEPVGLMTGSGVVGVKVPQFSFSR
		CLGFSDKQIALAVLSTELAVR
Calmodulin-1	CALM1	ADQLTEEQIAEFKEAFSLFDKDGDGTITTK
		EAFSLFDKDGDGTITTKELGTVMR
		ADQLTEEQIAEFKEAFSLFDKDGDGTITTKELGTVMR
Adenylyl cyclase-associated protein 1	CAP1	LSDLLAPISEQIKEVITFR
Cell cycle and apoptosis regulator protein 2	CCAR2	EAAPDAGAEPITADSDPAYSSKVLLLSSPGLEELYR
		AAYNPGQAVPWNAVKVQTLSNQPLLK
		SPAPPLLHVAALGQKQGILGAQPQLIFQPHR
		VQTLSNQPLLKSPAPPLLHVAALGQK
T-complex protein 1 subunit beta	CCT2	ASLSLAPVNIFKAGADEER
		EALLSSAVDHGSDEVKFR
		LALVTGGEIASTFDHPELVKLGSCK
		DASLMVTNDGATILKNIGVDNPAAK
		LGGSLADSYLDEGFLLDKK
		ILIANTGMDTDKIKIFGSR
		NIGVDNPAAKVLVDMSR
		SLHDALCVLAQTVKDSR
		LTSFIGAIAIGDLVKSTLGPK
T-complex protein 1 subunit gamma	CCT3	EIQVQHPAAKSMIEISR
		LQTYKTAVETAVLLLR
		ISIPVDISDSDMMLNIINSSITTKAISR
		KGESQTDIEITREEDFTR
T-complex protein 1 subunit zeta	CCT6A	TEVNSGFFYKSAEER
		IITEGFEAAKEK
		SVTLLIKGPNK
		KQLLHSCTVIATNILLVDEIMR
		TKVHAELADVLTEAVVDSILAIK
		VATAQDDITGDGTTSNVLIIGELLKQADLYISEGLHPR
		SVTLLIKGPNKHTLTQIK
T-cell surface glycoprotein CD3 zeta chain	CD247	MAEAYSEIGMKGER
T-cell surface glycoprotein CD3 epsilon chain	CD3E	NIGGDEDDKNIGSDEDHLSLKEFSELEQSGYYVCYPR
CD81 antigen	CD81	QFYDQALQQAVVDDDANNAKAVVK
Cell division cycle protein 123 homolog	CDC123	SVILPLPQNVKDYLLDDGTLVVSGR
		VQEAINSLGGSVFPKLNWSAPR
		TLSDIFLLFKSSDFITR
Cyclin-dependent kinase 1	CDK1	DLKPQNLLIDDKGTIK
		ALGTPNNEVWPEVESLQDYKNTFPK
		ISGKMALNHPYFNDLDNQIK
		KPLFHGDSEIDQLFR
		DLKPQNLLIDDKGTIKLADFGLAR
		NLDENGLDLLSKMLIYDPAKR
		WKPGSLASHVKNLDENGLDLLSK
		EISLLKELR
		NLDENGLDLLSKMLIYDPAK
Cyclin-dependent kinase 6	CDK6	ADQQYECVAEIGEGAYGKVFK
		DLKPQNILVTSSGQIK
		GSSDVDQLGKILDVIGLPGEEDWPR
		SAQPIEKFVTDIDELGKDLLLK
		FVTDIDELGKDLLLKCLTFNPAK
		DLKPQNILVTSSGQIKLADFGLAR
		GSSDVDQLGKILDVIGLPGEEDWPRDVALPR
CUGBP Elav-like family member 1	CELF1	SQNPPQSKGCCFVTFYTR
Cilia- and flagella-associated protein 36	CFAP36	EIGINEDQFQEACTSPLAKTHTSQAILQPVLAAEDFTIFK
		NGVLPDCLTDGSDVVSDLEHEEMKILR
		AMMVQKNIEMQLQAIR
Cofilin-1	CFL1	KEDLVFIFWAPESAPLKSK
		NIILEEGKEILVGDVGQTVDDPYATFVKMLPDKDCR
		YALYDATYETKESK
		AVLFCLSEDKK
		AVLFCLSEDKKNIILEEGKEILVGDVGQTVDDPYATFVK
		ESKKEDLVFIFWAPESAPLKSK
		NIILEEGKEILVGDVGQTVDDPYATFVK
		ASGVAVSDGVIKVFNDMK
		HELQANCYEEVKDR
		LTGIKHELQANCYEEVKDR
MICOS complex subunit MIC19	CHCHD3	VTFEADENENITVVKGIR
		YESHPVCADLQAKILQCYR
Chitinase-3-like protein 2	CHI3L2	LQDQQVPYAVKGNQWVGYDDVK
Cysteine-rich hydrophobic domain-containing protein 2	CHIC2	SIEKLLEWENNR
		RSIEKLLEWENNR
Probable cytosolic iron-sulfur protein assembly protein CIAO1	CIAO1	IWGTEGDSWICKSVLSEGHQR
		EPGLLASCSDDGEVAFWKYQRPEGL
		QYLPGNEQGVACSGSDPSWKCICTLSGFHSR
Chloride intracellular channel protein 1	CLIC1	ALKVLDNYLTSPLPEEVDETSAEDEGVSQR
		FSAYIKNSNPALNDNLEK
		AEEQPQVELFVKAGSDGAK
		EEFASTCPDDEEIELAYEQVAKALK
Clathrin interactor 1	CLINT1	ELVDKATNVVMNYSEIESK
		IGSTIDDTISKFR
		LGELSDKIGSTIDDTISK
		QDAFANFANFSK
		SAFPFSDKLGELSDK
		SLENYHFVDEHGKDQGINIR
Calponin-2	CNN2	NFDDATMKAGQCVIGLQMGTNK
		TWIEGLTGLSIGPDFQKGLK
		TKGLQSGVDIGVK
		AGQCVIGLQMGTNKCASQSGMTAYGTR
		GPSYGLSAEVKNR
2',3'-cyclic-nucleotide 3'-phosphodiesterase	CNP	FCDYGKAPGAEEYAQQDVLKK
		FCDYGKAPGAEEYAQQDVLK
Catechol O-methyltransferase	COMT	KGTVLLADNVICPGAPDFLAHVR
		VTLVVGASQDIIPQLKK
Coatomer subunit gamma-1	COPG1	ALQQYTLEPSEKPFDLKSVPLATAPMAEQR
		GLGPLFKSSPEPVALTESETEYVIR
COP9 signalosome complex subunit 8	COPS8	KPVAGALDVSFNKFIPLSEPAPVPPIPNEQQLAR
Coronin-1A	CORO1A	AVFVSEGKILTTGFSR
		HLEEPLSLQELDTSSGVLLPFFDPDTNIVYLCGKGDSSIR
		KSDLFQEDLYPPTAGPDPALTAEEWLGGR
		YFEITSEAPFLHYLSMFSSKESQR
		FVALICEASGGGAFLVLPLGKTGR
		HVFGQPAKADQCYEDVR
		QVALWDTKHLEEPLSLQELDTSSGVLLPFFDPDTNIVYLCGK
Cytochrome c oxidase assembly protein COX11, mitochondrial	COX11	AKNPTDKPVIGISTYNIVPFEAGQYFNK
		NPTDKPVIGISTYNIVPFEAGQYFNKIQCFCFEEQR
		AKNPTDKPVIGISTYNIVPFEAGQYFNKIQCFCFEEQR
Copine-1	CPNE1	DFLGKSDPFLEFFR
Cold shock domain-containing protein E1	CSDE1	ATVECVKDQFGFINYEVGDSK
		DVEGSTSPQIGDKVEFSISDK
		ETGVIEKLLTSYGFIQCSER
		LKNITLDDASAPR
		ATVECVKDQFGFINYEVGDSKK
		CQGVVCAMKEAFGFIER
		LFFHCSQYNGNLQDLKVGDDVEFEVSSDRR
		DVEGSTSPQIGDKVEFSISDKQRPGQQVATCVR
		THSVNGITEEADPTIYSGKVIRPLR
Casein kinase II subunit beta	CSNK2B	LYGFKIHPMAYQLQLQAASNFK
		GNEFFCEVDEDYIQDKFNLTGLNEQVPHYR
Cleavage stimulation factor subunit 2 tau variant	CSTF2T	AVASLPPEQMFELMKQMK
		IHVTPLIPGKSQSVSVSGPGPGPGPGLCPGPNVLLNQQNPPAPQPQHLAR
		IMDPEIALKILHR
CTP synthase 1	CTPS1	LEIKYIDSADLEPITSQEEPVR
		YHEAWQKLCSAHGVLVPGGFGVR
		EKISMFCHVEPEQVICVHDVSSIYR
		KGDYLGKTVQVVPHITDAIQEWVMR
		LLETCSIALVGKYTK
		CLEEQGLKFVGQDVEGER
		GTEGKIQAIAWAR
		IYQYVINKER
		ALEHSALAINHKLEIK
Protein CutA	CUTA	GKIEEDSEVLMMIKTQSSLVPALTDFVR
		LAACVNLIPQITSIYEWKGK
		VLLTMASGSPPTQPSPASDSGSGYVPGSVSAAFVTCPNEKVAK
Peptidyl-prolyl cis-trans isomerase CWC27 homolog	CWC27	VVPGFIVQGGDPTGTGSGGESIYGAPFKDEFHSR
DDB1- and CUL4-associated factor 5	DCAF5	YSYISYSNNKDGETSLVTGEADEGR
Deoxycytidine kinase	DCK	TNFDYLQEVPILTLDVNEDFKDKYESLVEK
		ISIEGNIAAGKSTFVNILK
		STFVNILKQLCEDWEVVPEPVAR
		WCNVQSTQDEFEELTMSQKNGGNVLQMMYEKPER
Dynactin subunit 1	DCTN1	KTSQLLETLNQLSTHTHVVDITR
		ASLASLPPLHVAKLSHEGPGSELPAGALYR
Protein DDI1 homolog 2	DDI2	EDVRPEEIADQELAEALQKSAEDAER
		LFSADPFDLEAQAKIEEDIR
		DMLLANPHELSLLKER
		NPPLAEALLSGDLEKFSR
		KNVLVIGTTGSQTTFLPEGELPECAR
		QKENADPRPPVQFPNLPR
		SLASYGLKDGDVVILR
DNA damage-inducible transcript 4 protein	DDIT4	LLMPSQLVSQVGKELLR
ATP-dependent RNA helicase DDX18	DDX18	SAEAQKLGNGINIIVATPGR
ATP-dependent RNA helicase DDX39A	DDX39A	LTLHGLQQYYVKLK
		DFLLKPELLR
		DIKGSYVSIHSSGFR
		ELAFQISKEYER
		FGTKGLAITFVSDENDAK
		NVKHFVLDECDKMLEQLDMR
		AEQDVENDLLDYDEEEEPQAPQESTPAPPKKDIK
		LTPHEKQCMMFSATLSK
ATP-dependent RNA helicase DDX3X	DDX3X	IGLDFCKYLVLDEADR
		GLDISNVKHVINFDLPSDIEEYVHR
		KGADSLEDFLYHEGYACTSIHGDR
		KQYPISLVLAPTR
		NINITKDLLDLLVEAK
		DLMACAQTGSGKTAAFLLPILSQIYSDGPGEALR
		VGSTSENITQKVVWVEESDKR
		HTMMFSATFPKEIQMLAR
Probable ATP-dependent RNA helicase DDX47	DDX47	DIIGLAETGSGKTGAFALPILNALLETPQR
		DLGVTDVLCEACDQLGWTKPTKIQIEAIPLALQGR
		DLGVTDVLCEACDQLGWTKPTK
Probable ATP-dependent RNA helicase DDX5	DDX5	HGKAPILIATDVASR
		EANQAINPKLLQLVEDR
		GLDVEDVKFVINYDYPNSSEDYIHR
		LIDFLECGKTNLR
		QNFTEPTAIQAQGWPVALSGLDMVGVAQTGSGKTLSYLLPAIVHINHQPFLER
		STCIYGGAPKGPQIR
		STKTGTAYTFFTPNNIK
		TGTAYTFFTPNNIKQVSDLISVLR
ATP-dependent RNA helicase A	DHX9	YPSPFFVFGEKIR
		AAMEALVVEVTKQPAIISQLDPVNER
		AISAKGMTLVTPLQLLLFASK
		GATGCGKTTQVPQFILDDFIQNDR
		GMTLVTPLQLLLFASKK
		LFTAHNNMTNYATVWASKTNLEQR
		LGGIGQFLAKAIEPPPLDAVIEAEHTLR
		SSVNCPFSSQDMKYPSPFFVFGEK
		TPLHEIALSIKLLR
		VILSTNIAETSITINDVVYVIDSCKQK
		KFESEILEAISQNSVVIIR
Disco-interacting protein 2 homolog B	DIP2B	EAAAAVDVKTWPTIIDTDDLPR
		LLSPYSPQTQETDSAVQKELR
		RPPLKEFFVDDSEEIVEVPQPDPNQPKPEGR
		SIQGSSTSSSASSTLSHGEVKGTSGSLADVFANTR
		SKLLSPYSPQTQETDSAVQK
		VNTEDKNSALTVQDVGHVMPGGMMCIVKPDGPPQLCK
		AQLAELELELSEGDITQKGYEK
		MIVDVSKAACILTSQTLMR
		VSTKIQQLLNTLK
Exosome complex exonuclease RRP44	DIS3	AIEEGIPAFTCEEYVKSLTANPELIDR
		IIFSEHLPLSKLQQGIK
		AVHEDIVAVELLPKSQWVAPSSVVLHDEGQNEEDVEKEEETER
Dihydrolipoyllysine-residue succinyltransferase component of 2-oxoglutarate dehydrogenase complex, mitochondrial	DLST	AEPTAAAVPPPAAPIPTQMPPVPSPSQPPSGKPVSAVKPTVAPPLAEPGAGKGLR
DNA (cytosine-5)-methyltransferase 1	DNMT1	LNNPGSTVFTEDCNILLKLVMAGETTNSR
		LPQKGDVEMLCGGPPCQGFSGMNR
Dedicator of cytokinesis protein 2	DOCK2	DVFSISTLVCSTKLTQNVGLLGLLK
		LTQNVGLLGLLKWR
		DILLPVITKELK
		NKPVPDQIINFYKSNYVQR
		TSFVTAYKLPGILR
Destrin	DSTN	KEELMFFLWAPELAPLKSK
		YALYDASFETKESR
Cytoplasmic dynein 1 heavy chain 1	DYNC1H1	WQASSLPADDLCTENAIMLKR
		DLPPVSGSIIWAKQIDR
Dynein light chain 1, cytoplasmic	DYNLL1	NADMSEEMQQDSVECATQALEKYNIEK
		AVIKNADMSEEMQQDSVECATQALEK
		KYNPTWHCIVGR
Dynein light chain roadblock-type 1	DYNLRB1	LQSQKGVQGIIVVNTEGIPIK
		AEVEETLKR
Elongation factor 1-alpha 1	EEF1A1	EHALLAYTLGVKQLIVGVNK
		IGYNPDTVAFVPISGWNGDNMLEPSANMPWFKGWK
		KDGNASGTTLLEALDCILPPTRPTDKPLR
		LPLQDVYKIGGIGTVPVGR
		NMITGTSQADCAVLIVAAGVGEFEAGISKNGQTR
		SGDAAIVDMVPGKPMCVESFSDYPPLGR
		VETGVLKPGMVVTFAPVNVTTEVK
		DGNASGTTLLEALDCILPPTRPTDKPLRLPLQDVYKIGGIGTVPVGR
		QLIVGVNKMDSTEPPYSQK
		KIGYNPDTVAFVPISGWNGDNMLEPSANMPWFK
		YEEIVKEVSTYIK
		FLKSGDAAIVDMVPGKPMCVESFSDYPPLGR
		KIGYNPDTVAFVPISGWNGDNMLEPSANMPWFKGWK
		QTVAVGVIKAVDKK
Elongation factor 1-gamma	EEF1G	AFKALIAAQYSGAQVR
		KFPAGKVPAFEGDDGFCVFESNAIAYYVSNEELR
		DPFAHLPKSTFVLDEFKR
Elongation factor 2	EEF2	STAISLFYELSENDLNFIKQSK
		CELLYEGPPDDEAAMGIKSCDPK
		FAAKGEGQLGPAER
		VFSGLVSTGLKVR
		YLAEKYEWDVAEAR
		NMSVIAHVDHGKSTLTDSLVCK
		STLTDSLVCKAGIIASAR
		LYMKARPFPDGLAEDIDKGEVSAR
		WLPAGDALLQMITIHLPSPVTAQKYR
Eukaryotic translation initiation factor 2 subunit 2	EIF2S2	FPDEDEILEKDEALEDEDNKKDDGISFSNQTGPAWAGSER
		TSFVNFTDICKLLHR
Eukaryotic translation initiation factor 3 subunit A	EIF3A	DIDIEDLEELDPDFIMAKQVEQLEK
		EQPEKEPELQQYVPQLQNNTILR
		LLDMDGIIVEKQR
		TEAAKEESQQMVLDIEDLDNIQTPESVLLSAVSGEDTQDRTDR
		TEAAKEESQQMVLDIEDLDNIQTPESVLLSAVSGEDTQDR
		QSVYEEKLKQFEER
		DLYNWLEVEFNPLKLCER
Eukaryotic translation initiation factor 3 subunit F	EIF3F	IGVDLIMKTCFSPNR
		IQDALSTVLQYAEDVLSGKVSADNTVGR
		TMGVMFTPLTVKYAYYDTER
		VIGTLLGTVDKHSVEVTNCFSVPHNESEDEVAVDMEFAK
Eukaryotic translation initiation factor 3 subunit I	EIF3I	ITSAVWGPLGECIIAGHESGELNQYSAKSGEVLVNVK
		LGTYMGHTGAVWCVDADWDTKHVLTGSADNSCR
		EGDLLFTVAKDPIVNVWYSVNGER
		SGEVLVNVKEHSR
		GHFGPINSVAFHPDGKSYSSGGEDGYVR
Eukaryotic initiation factor 4A-I	EIF4A1	AEVQKLQMEAPHIIVGTPGR
		AILPCIKGYDVIAQAQSGTGK
		GIYAYGFEKPSAIQQR
		KGVAINMVTEEDKR
		LNSNTQVVLLSATMPSDVLEVTKK
		YIKMFVLDEADEMLSR
		DFTVSAMHGDMDQKER
		ELAQQIQKVVMALGDYMGASCHACIGGTNVR
		GVAINMVTEEDKR
		ILVKKEELTLEGIR
		KVDWLTEKMHAR
		GFKDQIYDIFQKLNSNTQVVLLSATMPSDVLEVTK
		TATFAISILQQIELDLKATQALVLAPTR
		GFKDQIYDIFQK
Eukaryotic initiation factor 4A-II	EIF4A2	AIIPCIKGYDVIAQAQSGTGK
		GIYAYGFEKPSAIQQR
		NEMQKLQAEAPHIVVGTPGR
		KVDWLTEKMHAR
		KGVAINFVTEEDKR
Eukaryotic initiation factor 4A-III	EIF4A3	GIYAYGFEKPSAIQQR
		ELAVQIQKGLLALGDYMNVQCHACIGGTNVGEDIR
		YLPPATQVVLISATLPHEILEMTNKFMTDPIR
		KLDYGQHVVAGTPGR
		MLVLDEADEMLNKGFK
Eukaryotic translation initiation factor 4 gamma 2	EIF4G2	FMKSQGLSQLYHNQSQGLLSQLQGQSK
		LLISKLQDEFENR
		LEVDIPLVKSYLAQFAAR
		VQLKDMGEDLECLCQIMR
		HFLPEMLSKVIILSLDR
ELAV-like protein 1	ELAVL1	FAANPNQNKNVALLSQLYHSPAR
		SLFSSIGEVESAKLIR
		ILQVSFKTNK
		LGDKILQVSFK
		SEAEEAITSFNGHKPPGSSEPITVKFAANPNQNK
		VSYARPSSEVIKDANLYISGLPR
Engulfment and cell motility protein 1	ELMO1	LQNLSYTEILKIR
		VLHYGDLEESPQGEVPHDSLQDKLPVADIKAVVTGK
		IQPEILELIKQQR
Elongin-B	ELOB	LYKDDQLLDDGKTLGECGFTSQTARPQAPATVGLAFR
Alpha-enolase	ENO1	FGANAILGVSLAVCKAGAVEK
		GNPTVEVDLFTSKGLFR
		HIADLAGNSEVILPVPAFNVINGGSHAGNKLAMQEFMILPVGAANFR
		IGAEVYHNLKNVIK
		SCNCLLLKVNQIGSVTESLQACK
		SILKIHAR
		YGKDATNVGDEGGFAPNILENK
		SGETEDTFIADLVVGLCTGQIKTGAPCR
		VNQIGSVTESLQACKLAQANGWGVMVSHR
		DATNVGDEGGFAPNILENKEGLELLK
Epidermal growth factor receptor substrate 15	EPS15	EKDPEIFCDPFTSATTTTNKEADPSNFANFSAYPSEEDMIEWAK
		IDPFGGDPFKGSDPFASDCFFR
		LNDPFQPFPGNDSPKEKDPEIFCDPFTSATTTTNK
		SATSSSVSNVVITKNVFEETSVK
		HNDPFAPGGTVVAASDSATDPFASVFGNESFGGGFADFSTLSKVNNEDPFR
Extended synaptotagmin-1	ESYT1	QLLDDEEQLTAKTLYMSHR
		KLDVSVKSNSSFMSR
		KPHTESLELQVR
		TKTISQTSAPVWDESASFLIR
		FFLQDPQSQELDVQVKDDSR
Ethanolamine kinase 1	ETNK1	EILSNLGSPVVLCHNDLLCKNIIYNEK
FAS-associated factor 1	FAF1	EYNLNFSGSSTIQEVKR
		QILENELQIPVSKMLLK
		TGDVEDSTVLKSLHLPK
FAS-associated factor 2	FAF2	VTDPVGDIVSFMHSFEEKYGR
		ESPEKFQIEANFPR
		DLTQEQTEKLLQFQDLTGIESMDQCR
		IIFKLPNDSR
Protein FAM160B1	FAM160B1	ILETLYTLGKADCPPGMK
Fanconi anemia group D2 protein	FANCD2	KQLSSTVFK
		DGGPVTSQESGQKLVSPLCLAPYFR
Fanconi anemia group I protein	FANCI	KAMFANQLDAR
		MIKSELEDFELDK
rRNA 2'-O-methyltransferase fibrillarin	FBL	LAAAILGGVDQIHIKPGAK
		SKLAAAILGGVDQIHIKPGAK
		ANCIDSTASAEAVFASEVKK
Farnesyl pyrophosphate synthase	FDPS	GQICWYQKPGVGLDAINDANLLEACIYR
		TAFYSFYLPIAAAMYMAGIDGEKEHANAK
		IGTDIQDNKCSWLVVQCLQR
Flap endonuclease 1	FEN1	GIQGLAKLIADVAPSAIR
		AGKVYAAATEDMDCLTFGSPVLMR
		RLDPNKYPVPENWLHKEAHQLFLEPEVLDPESVELK
		HLLSLMGIPYLDAPSEAEASCAALVKAGK
Fermitin family homolog 3	FERMT3	AGMKTASGDYIDSSWELR
		GCEVVPDVNVSGQKFCIK
		EKEPEEELYDLSKVVLAGGVAPALFR
		QWLLQTHWTLDKYGILADAR
Peptidyl-prolyl cis-trans isomerase FKBP4	FKBP4	ATESGAQSAPLPMEGVDISPKQDEGVLK
		IVSWLEYESSFSNEEAQKAQALR
		LQAFSAAIESCNKALELDSNNEK
Peptidyl-prolyl cis-trans isomerase FKBP8	FKBP8	GKVLAQQGEYSEAIPILR
		SCSLVLEHQPDNIKALFR
		TLVPGPPGSSRPVKGQVVTVHLQTSLENGTR
Filamin-A	FLNA	MSHLKVGSAADIPINISETDLSLLTATVVPPSGR
		VQGPKGLVEPVDVVDNADGTQTVNYVPSR
		ALGALVDSCAPGLCPDWDSWDASKPVTNAR
Far upstream element-binding protein 3	FUBP3	AELVQGQSAPVGMKAEGFVDALHR
Fragile X mental retardation syndrome-related protein 1	FXR1	HLECTKQLAAAFHEEFVVR
		IFYHPETTQLMILSASEATVKR
		ANDQEPCGWWLAKVR
Ras GTPase-activating protein-binding protein 1	G3BP1	FMQTFVLAPEGSVANKFYVHNDIFR
		FYGKNSSYVHGGLDSNGKPADAVYGQK
Trifunctional purine biosynthetic protein adenosine-3	GART	QVLVAPGNAGTACSEKISNTAISISDHTALAQFCK
		AFTKPEEACSFILSADFPALVVKASGLAAGK
		GVEITGFPEAQALGLEVFHAGTALKNGK
		GYPGDYTKGVEITGFPEAQALGLEVFHAGTALK
		ISNTAISISDHTALAQFCKEK
		IVAKSSLQYSSPAPDGCGDQTLGDLLLTPTR
		LLEGDGGPNTGGMGAYCPAPQVSNDLLLKIK
		SAGVQCFGPTAEAAQLESSKR
		SGHVKAFAHITGGGLLENIPR
		TFNCGVGAVLVVSKEQTEQILR
		VDLGGFAGLFDLKAAGFKDPLLASGTDGVGTK
		VLPEKLGVDLDAQTWR
		AFTKPEEACSFILSADFPALVVK
		GLAAIKFEGAIYR
		KGLAAIKFEGAIYR
		LDLSVTEAVVAGIAKACGK
		AAGFKDPLLASGTDGVGTKLK
		LAQSHHVKQVLVAPGNAGTACSEK
		ENLISALEEAKK
eIF-2-alpha kinase activator GCN1	GCN1	NPSGLTQYIPVLVDSFLPLLKSPLAAPR
		LFNDSSPVVLEESWDALNAITKK
Rab GDP dissociation inhibitor beta	GDI2	EIRPALELLEPIEQKFVSISDLLVPK
		YGKSPYLYPLYGLGELPQGFAR
		NPYYGGESASITPLEDLYKR
Glutamine synthetase	GLUL	KDPNKLVLCEVFK
		TLDSEPKCVEELPEWNFDGSSTLQSEGSNSDMYLVPAAMFR
Glia maturation factor gamma	GMFG	ETDNAAIIMKVDKDR
		VSYPLCFIFSSPVGCKPEQQMMYAGSKNR
		SDSLVVCEVDPELTEKLR
		SDSLVVCEVDPELTEKLRK
		VSYPLCFIFSSPVGCKPEQQMMYAGSK
		TTDDLTEAWLQEKLSFFR
GMP synthase [glutamine-hydrolyzing]	GMPS	ELFVQSEIFPLETPAFAIKEQGFR
		IVADFSASVKKPHTLLQR
		VILKNFLYDIAGCSGTFTVQNR
		VVYIFGPPVKEPPTDVTPTFLTTGVLSTLR
		VGTSKVLVLLSGGVDSTVCTALLNR
		VICAEEPYICKDFPETNNILK
Guanine nucleotide-binding protein subunit alpha-15	GNA15	MPTTGINEYCFSVQKTNLR
Guanine nucleotide-binding protein G(q) subunit alpha	GNAQ	TLESIMACCLSEEAKEAR
Guanine nucleotide-binding protein G(I)/G(S)/G(T) subunit beta-1	GNB1	SSWVMTCAYAPSGNYVACGGLDNICSIYNLKTR
		LFVSGACDASAKLWDVR
		ADQELMTYSHDNIICGITSVSFSKSGR
		KACADATLSQITNNIDPVGR
		SELDQLRQEAEQLKNQIR
		LIIWDSYTTNKVHAIPLR
Guanine nucleotide-binding protein G(I)/G(S)/G(O) subunit gamma-2	GNG2	VSKAAADLMAYCEAHAK
		VSKAAADLMAYCEAHAKEDPLLTPVPASENPFR
COP9 signalosome complex subunit 1	GPS1	QAAKCLLLASFDHCDFPELLSPSNVAIYGGLCALATFDR
		QAAKCLLLASFDHCDFPELLSPSNVAIYGGLCALATFDRQELQR
Glutathione S-transferase P	GSTP1	ALPGQLKPFETLLSQNQGGK
		ASCLYGQLPKFQDGDLTLYQSNTILR
		TLGLYGKDQQEAALVDMVNDGVEDLR
		LKAFLASPEYVNLPINGNGK
		LKAFLASPEYVNLPINGNGKQ
		MLLADQGQSWKEEVVTVETWQEGSLKASCLYGQLPK
		EEVVTVETWQEGSLKASCLYGQLPK
Glycophorin-C	GYPC	GTYHTNEAKGTEFAESADAALQGDPALQDAGDSSR
Core histone macro-H2A.1	H2AFY	GKLEAIITPPPAK
		GVTIASGGVLPNIHPELLAKK
		GVTIASGGVLPNIHPELLAKKR
		AASADSTTEGTPADGFTVLSTKSLFLGQK
		QGEVSKAASADSTTEGTPADGFTVLSTK
		FVIHCNSPVWGADKCEELLEKTVK
		GKLEAIITPPPAKK
Histone H3.3	H3F3A	EIAQDFKTDLR
		FQSAAIGALQEASEAYLVGLFEDTNLCAIHAKR
		YQKSTELLIR
Vigilin	HDLBP	IDLPAENSNSETIIITGKR
		VIFPAAEDKDQDLITIIGKEDAVR
Protein HGH1 homolog	HGH1	GEAGAGAGASGGPEASPEAEVVKLLPFLAPGAR
Histone H1.3	HIST1H1D	ASGPPVSELITKAVAASK
Histone H2A type 2-A	HIST2H2AA3	VTIAQGGVLPNIQAVLLPKK
		VTIAQGGVLPNIQAVLLPKKTESHHK
		NDEELNKLLGK
		HLQLAIRNDEELNKLLGK
		NDEELNKLLGKVTIAQGGVLPNIQAVLLPK
Histone H2A type 2-C	HIST2H2AC	VTIAQGGVLPNIQAVLLPKK
		VTIAQGGVLPNIQAVLLPKKTESHK
		NDEELNKLLGK
		HLQLAIRNDEELNKLLGK
		NDEELNKLLGKVTIAQGGVLPNIQAVLLPK
3-hydroxy-3-methylglutaryl-coenzyme A reductase	HMGCR	ASTLAKFALSSNSQDEVR
Heme oxygenase 2	HMOX2	LPSTGEGTQFYLFENVDNAQQFKQLYR
		ALKLPSTGEGTQFYLFENVDNAQQFKQLYR
Heterogeneous nuclear ribonucleoprotein A0	HNRNPA0	GHFEAFGTLTDCVVVVNPQTKR
		CFGFVTYSNVEEADAAMAASPHAVDGNTVELKR
		LFVGGLKGDVAEGDLIEHFSQFGTVEK
		MENSQLCKLFIGGLNVQTSESGLR
Heterogeneous nuclear ribonucleoprotein A1	HNRNPA1	SSGPYGGGGQYFAKPR
		GFGFVTYATVEEVDAAMNARPHKVDGR
		IFVGGIKEDTEEHHLR
		KLFIGGLSFETTDESLR
		SHFEQWGTLTDCVVMRDPNTKR
		GFAFVTFDDHDSVDKIVIQKYHTVNGHNCEVR
		KIFVGGIKEDTEEHHLR
		DYFEQYGKIEVIEIMTDR
Heterogeneous nuclear ribonucleoproteins A2/B1	HNRNPA2B1	NYYEQWGKLTDCVVMR
		DYFEEYGKIDTIEIITDR
		KLFIGGLSFETTEESLR
		GFGFVTFDDHDPVDKIVLQK
		GFGFVTFDDHDPVDKIVLQKYHTINGHNAEVR
		IVLQKYHTINGHNAEVR
		LFVGGIKEDTEEHHLR
		NYYEQWGKLTDCVVMRDPASKR
		KLFVGGIKEDTEEHHLR
		NYYEQWGKLTDCVVMRDPASK
		GGYGGGGPGYGNQGGGYGGGYDNYGGGNYGSGNYNDFGNYNQQPSNYGPMKSGNFGGSR
		LTDCVVMRDPASKR
Heterogeneous nuclear ribonucleoprotein A3	HNRNPA3	IFVGGIKEDTEEYNLR
		GFGFVTYSCVEEVDAAMCARPHKVDGR
		YGKIETIEVMEDR
		WGTLTDCVVMRDPQTKR
Heterogeneous nuclear ribonucleoproteins C1/C2	HNRNPC	IVGCSVHKGFAFVQYVNER
		MIAGQVLDINLAAEPKVNR
		ASNVTNKTDPR
		VFIGNLNTLVVKK
		SDVEAIFSKYGK
Heterogeneous nuclear ribonucleoprotein F	HNRNPF	GLPYKATENDIYNFFSPLNPVR
		ITGEAFVQFASQELAEKALGK
		YIGIVKQAGLER
		MLGPEGGEGFVVKLR
		QSGEAFVELGSEDDVKMALK
		QSGEAFVELGSEDDVKMALKK
		TEMDWVLKHSGPNSADSANDGFVR
		VTGEADVEFATHEEAVAAMSKDR
		YIEVFKSSQEEVR
		GLPFGCTKEEIVQFFSGLEIVPNGITLPVDPEGK
Heterogeneous nuclear ribonucleoprotein H	HNRNPH1	SNNVEMDWVLKHTGPNSPDTANDGFVR
		STGEAFVQFASQEIAEKALK
		EGRPSGEAFVELESEDEVKLALKK
		FFSDCKIQNGAQGIR
		MMLGTEGGEGFVVKVR
		STGEAFVQFASQEIAEKALKK
		VTGEADVEFATHEDAVAAMSKDK
		MLGTEGGEGFVVKVR
Heterogeneous nuclear ribonucleoprotein H2	HNRNPH2	FFSDCKIQNGTSGIR
		STGEAFVQFASQEIAEKALK
		STGEAFVQFASQEIAEKALKK
		SNSVEMDWVLKHTGPNSPDTANDGFVR
Heterogeneous nuclear ribonucleoprotein H3	HNRNPH3	MDWVMKHNGPNDASDGTVR
		STGEAFVQFASKEIAENALGK
Heterogeneous nuclear ribonucleoprotein K	HNRNPK	HESGASIKIDEPLEGSEDR
		IILDLISESPIKGR
		IITITGTQDQIQNAQYLLQNSVKQYSGK
		LLIHQSLAGGIIGVKGAK
		DLAGSIIGKGGQR
		ILLQSKNAGAVIGK
		ILSISADIETIGEILKK
		VVECIKIILDLISESPIK
		ENTQTTIKLFQECCPHSTDR
		IIPTLEEGLQLPSPTATSQLPLESDAVECLNYQHYKGSDFDCELR
		KIIPTLEEGLQLPSPTATSQLPLESDAVECLNYQHYK
		METEQPEETFPNTETNGEFGKRPAEDMEEEQAFKR
		VVLIGGKPDR
Heterogeneous nuclear ribonucleoprotein L	HNRNPL	ASLNGADIYSGCCTLKIEYAKPTR
		KNGVQAMVEFDSVQSAQR
		LKTDNAGDQHGGGGGGGGGAGAAGGGGGGENYDDPHKTPASPVVHIR
		SDALETLGFLNHYQMKNPNGPYPYTLK
		LNVCVSKQPAIMPGQSYGLEDGSCSYK
		LNVCVSKQPAIMPGQSYGLEDGSCSYKDFSESR
		NDQDTWDYTNPNLSGQGDPGSNPNKR
		TDNAGDQHGGGGGGGGGAGAAGGGGGGENYDDPHKTPASPVVHIR
		AITHLNNNFMFGQKLNVCVSK
		IQHPSNVLHFFNAPLEVTEENFFEICDELGVKRPSSVK
		NPNGPYPYTLKLCFSTAQHAS
		QPAIMPGQSYGLEDGSCSYKDFSESR
		VFNVFCLYGNVEKVK
		YGPQYGHPPPPPPPPEYGPHADSPVLMVYGLDQSKMNCDR
		AKASLNGADIYSGCCTLK
		GLIDGVVEADLVEALQEFGPISYVVVMPKKR
		SKPGAAMVEMADGYAVDR
		SSSGLLEWESKSDALETLGFLNHYQMK
		LNVFKNDQDTWDYTNPNLSGQGDPGSNPNKR
		QALVEFEDVLGACNAVNYAADNQIYIAGHPAFVNYSTSQKISRPGDSDDSR
Heterogeneous nuclear ribonucleoprotein M	HNRNPM	VGEVTYVELLMDAEGKSR
		AFITNIPFDVKWQSLK
		DKFNECGHVLYADIKMENGK
		GCGVVKFESPEVAER
		GDFFPPERPQQLPHGLGGIGMGLGPGGQPIDANHLNKGIGMGNIGPAGMGMEGIGFGINK
		GEIIAKQGGGGGGGSVPGIER
		GIGTVTFEQSIEAVQAISMFNGQLLFDRPMHVKMDER
		INEILSNALKR
		LKEVFSMAGVVVR
		NLPFDFTWKMLK
		RGEIIAKQGGGGGGGSVPGIER
		EKVGEVTYVELLMDAEGKSR
		GIGMGNIGPAGMGMEGIGFGINKMGGMEGPFGGGMENMGR
		ADILEDKDGKSR
		AFITNIPFDVKWQSLKDLVK
		KACQIFVR
		LGSTVFVANLDYKVGWK
		AAGVEAAAEVAATEIKMEEESGAPGVPSGNGAPGPK
		EKVGEVTYVELLMDAEGK
Heterogeneous nuclear ribonucleoprotein R	HNRNPR	DLYEDELVPLFEKAGPIWDLR
		NLATTVTEEILEKSFSEFGK
		KYGGPPPDSVYSGVQPGIGTEVFVGKIPR
		LCDSYEIRPGKHLGVCISVANNR
		YGGPPPDSVYSGVQPGIGTEVFVGKIPR
		KYGGPPPDSVYSGVQPGIGTEVFVGK
		VWGNVVTVEWADPVEEPDPEVMAKVK
Heterogeneous nuclear ribonucleoprotein U	HNRNPU	EAAGKSSGPTSLFAVTVAPPGAR
		EKPYFPIPEEYTFIQNVPLEDR
		HAAENPGKYNILGTNTIMDK
		HLYTKDIDIHEVR
		AKSPQPPVEEEDEHFDDTVVCLDTYNCDLHFK
		APQCLGKFIEIAAR
		GNFTLPEVAECFDEITYVELQKEEAQK
		GYFEYIEENKYSR
		KDCEVVMMIGLPGAGKTTWVTK
		KMCLFAGFQR
		QMADTGKLNTLLQR
		SPQPPVEEEDEHFDDTVVCLDTYNCDLHFKISR
		YNILGTNTIMDKMMVAGFKK
		EVLAGRPLFPHVLCHNCAVEFNFGQKEKPYFPIPEEYTFIQNVPLEDR
		MKGNFTLPEVAECFDEITYVELQKEEAQK
		NGQDLGVAFKISK
		GPEEKKDCEVVMMIGLPGAGK
		ISKEVLAGRPLFPHVLCHNCAVEFNFGQK
		NQSQGYNQWQQGQFWGQKPWSQHYHQGYY
Heterogeneous nuclear ribonucleoprotein U-like protein 1	HNRNPUL1	IGWSLDSCSTQLGEEPFSYGYGGTGKK
		INEEISVKHLPSTEPDPHVVR
		QNQFYDTQVIKQENESGYER
		QGAPTSFLPPEASQLKPDR
3-hydroxyacyl-CoA dehydrogenase type-2	HSD17B10	LVGQGASAVLLDLPNSGGEAQAKK
		VDVAVNCAGIAVASKTYNLK
		GVIINTASVAAFEGQVGQAAYSASKGGIVGMTLPIAR
		SVKGLVAVITGGASGLGLATAER
Heat shock protein HSP 90-alpha	HSP90AA1	ADLINNLGTIAKSGTK
		ELISNSSDALDKIR
		GTKVILHLKEDQTEYLEER
		HSQFIGYPITLFVEKER
		KHLEINPDHSIIETLR
		SLTNDWEDHLAVKHFSVEGQLEFR
		TLTIVDTGIGMTKADLINNLGTIAK
		VILHLKEDQTEYLEER
		YYTSASGDEMVSLKDYCTR
		YIDQEELNKTKPIWTR
		NNIKLYVR
		GTKVILHLK
		TLTIVDTGIGMTKADLINNLGTIAKSGTK
		VTVITKHNDDEQYAWESSAGGSFTVR
		ELHINLIPNKQDR
		GTKVILHLKEDQTEYLEERR
Heat shock protein HSP 90-beta	HSP90AB1	ADLINNLGTIAKSGTK
		GTKVILHLKEDQTEYLEER
		HSQFIGYPITLYLEKER
		MIKLGLGIDEDEVAAEEPNAAVPDEIPPLEGDEDASR
		SIYYITGESKEQVANSAFVER
		SLTNDWEDHLAVKHFSVEGQLEFR
		TLTLVDTGIGMTKADLINNLGTIAK
		VILHLKEDQTEYLEER
		VVVITKHNDDEQYAWESSAGGSFTVR
		YIDQEELNKTKPIWTR
		NLKLGIHEDSTNR
		NNIKLYVR
		ELKIDIIPNPQER
		KHLEINPDHPIVETLR
		KHSQFIGYPITLYLEK
		GFEVVYMTEPIDEYCVQQLKEFDGK
		GTKVILHLK
		TLTLVDTGIGMTKADLINNLGTIAKSGTK
		YESLTDPSKLDSGKELK
		GTKVILHLKEDQTEYLEERR
Heat shock 70 kDa protein 14	HSPA14	YEIDTGEETKFVNPEDVAR
		GLLDQNGFTADDINKVVLCGGSSR
		LTNSAEVAKHSLSTLGSANCFLDSLYEGQDFDCNVSR
Heat shock protein 105 kDa	HSPH1	FFGKDISTTLNADEAVAR
		LKETAENSLKKPVTDCVISVPSFFTDAER
		LKVLGTAFDPFLGGK
		LMNDMTAVALNYGIYKQDLPSLDEKPR
		NHAAPFSKVLTFLR
		RGPFELEAFYSDPQGVPYPEAKIGR
		GCALQCAILSPAFKVR
		IEVPLYSLLEQTHLKVEDVSAVEIVGGATR
		LVEHFCAEFKTK
		LMSSNSTDLPLNIECFMNDKDVSGKMNR
		QDLPSLDEKPR
		ENLSYDLVPLKNGGVGIK
		NFDEKLVEHFCAEFK
		GPFELEAFYSDPQGVPYPEAKIGR
		SQFEELCAELLQKIEVPLYSLLEQTHLK
Isocitrate dehydrogenase [NADP], mitochondrial	IDH2	LVPGWTKPITIGR
		LIDDMVAQVLKSSGGFVWACK
		YSVAVKCATITPDEAR
Immediate early response 3-interacting protein 1	IER3IP1	FLKNIGWGTDQGIGGFGEEPGIK
		NIGWGTDQGIGGFGEEPGIKSQLMNLIR
Gamma-interferon-inducible protein 16	IFI16	LTCFELAPKSGNTGELR
		LTTINCEEGDKLKLTCFELAPK
		LKTEPEEVSIEDSAQSDLK
		KMFHATVATENEVFR
Interferon-induced transmembrane protein 1	IFITM1	MHKEEHEVAVLGPPPSTILPR
Interferon gamma receptor 1	IFNGR1	SIILPKSLISVVR
Insulin-like growth factor 2 mRNA-binding protein 1	IGF2BP1	LLVPTQYVGAIIGKEGATIR
		MVIITGPPEAQFKAQGR
		FASASIKIAPPETPDSK
		QGSPVAAGAPAKQQQVDIPLR
		TITVKGAIENCCR
		TADEVPLKILAHNNFVGR
Insulin-like growth factor 2 mRNA-binding protein 3	IGF2BP3	FTEEIPLKILAHNNFVGR
		LLVPTQFVGAIIGKEGATIR
		MVIITGPPEAQFKAQGR
		FAGASIKIAPAEAPDAK
		TGYAFVDCPDESWALKAIEALSGK
Interleukin enhancer-binding factor 2	ILF2	ILPTLEAVAALGNKVVESLR
		KLDPELHLDIKVLQSALAAIR
Acetolactate synthase-like protein	ILVBL	EQVPSLGSNVACGLAYTDYHKAAMGLGAR
MICOS complex subunit MIC60	IMMT	TSSAETPTIPLGSAVEAIKANCSDNEFTQALTAAIPPESLTR
		VQAAQSEAKVVSQYHELVVQAR
		GMSVSDLADKLSTDDLNSLIAHAHR
		KAHQLWLSVEALK
		VQEQELKSEFEQNLSEK
Integrator complex subunit 7	INTS7	SGQDYKIPIDNMTNEMEQR
Importin-4	IPO4	LLPPLLQIVCKGLEDPSQVVR
Ubiquitin-like protein ISG15	ISG15	AQITQKIGVHAFQQR
		VPLASQGLGPGSTVLLVVDKCDEPLSILVR
Integrin beta-1	ITGB1	WDTGENPIYKSAVTTVVNPK
		MNAKWDTGENPIYK
Integral membrane protein 2B	ITM2B	SGEEALIIPPDAVAVDCKDPDDVVPVGQR
		VTFNSALAQKEAK
Inosine triphosphate pyrophosphatase	ITPA	IDLPEYQGEPDEISIQKCQEAVR
		GCQDFGWDPCFQPDGYEQTYAEMPKAEK
Voltage-gated potassium channel subunit beta-2	KCNAB2	LSSSIIHEIDSILGNKPYSKK
Kinesin-like protein KIF2C	KIF2C	LFPGLAIKIQR
		SLLALKECIR
		TVNLEKSCVSVEWAEGGATK
DNA/RNA-binding protein KIN17	KIN	TDYWLQPEIIVKIITK
Kin of IRRE-like protein 1	KIRREL1	AIYSSFKDDVDLKQDLR
		TPYEAYDPIGKYATATR
		EEYEMKDPTNGYYNVR
Importin subunit alpha-1	KPNA2	TNIQKEATWTMSNITAGR
		AGLIPKFVSFLGR
		NNQGTVNWSVDDIVKGINSSNVENQLQATQAAR
		QDQIQQVVNHGLVPFLVSVLSKADFK
		TGVVPQLVKLLGASELPIVTPALR
		NKNPAPPIDAVEQILPTLVR
Importin subunit beta-1	KPNB1	SVKPQILSVFGDIALAIGGEFKK
		DCYPAVQKTTLVIMER
		ESCLEAYTGIVQGLKGDQENVHPDVMLVQPR
Cytosol aminopeptidase	LAP3	LYGSGDQEAWQKGVLFASGQNLAR
		LNLPINIIGLAPLCENMPSGKANKPGDVVR
Tyrosine-protein kinase Lck	LCK	AANILVSDTLSCKIADFGLAR
		LSRPCQTQKPQKPWWEDEWEVPR
		ANSLEPEPWFFKNLSR
		LGAGQFGEVWMGYYNGHTKVAVK
		QGSMSPDAFLAEANLMKQLQHQR
		AQSLTTGQEGFIPFNFVAKANSLEPEPWFFK
		FPIKWTAPEAINYGTFTIK
		ILEQSGEWWKAQSLTTGQEGFIPFNFVAK
		LYAVVTQEPIYIITEYMENGSLVDFLKTPSGIK
L-lactate dehydrogenase A chain	LDHA	ATLKDQLIYNLLK
		ATLKDQLIYNLLKEEQTPQNK
		DQLIYNLLKEEQTPQNK
		DYNVTANSKLVIITAGAR
		GLYGIKDDVFLSVPCILGQNGISDLVK
		NVNIFKFIIPNVVK
		QVVESAYEVIKLK
		YSPNCKLLIVSNPVDILTYVAWK
		LGVHPLSCHGWVLGEHGDSSVPVWSGMNVAGVSLKTLHPDLGTDKDKEQWK
		LKGEMMDLQHGSLFLR
DNA ligase 1	LIG1	AQIHALEGGEVKIFSR
		IDGAVIPDHWLDPSAVWEVKCADLSLSPIYPAAR
		LMLPPPPLTASGVFSKFR
Lamin-B1	LMNB1	IESLSSQLSNLQKESR
		KRVDVEESEASSSVSISHSASATGNVCIEEIDVDGK
		LYKEELEQTYHAKLENAR
		KSLEGDLEDLKDQIAQLEASLAAAK
		QIEYEYKLAQALHEMR
		STVFKTTIPEEEEEEEEAAGVVVEEELFHQQGTPR
		NQNSWGTGEDVKVILK
		DAALATALGDKKSLEGDLEDLKDQIAQLEASLAAAK
		MRIESLSSQLSNLQKESR
		SLEGDLEDLKDQIAQLEASLAAAK
Lamin-B2	LMNB2	LESLSYQLSGLQKQASAAEDR
		LELEQTYQAKLDSAK
		QQEYDFKMAQALEELR
		MRLESLSYQLSGLQKQASAAEDR
Low-density lipoprotein receptor-related protein 12	LRP12	DMAGASGGVAAPLPQKVPPTTAVEATVGACASSSTQSTR
Protein LSM14 homolog A	LSM14A	SGGTPYIGSKISLISK
		YEGILYTIDTENSTVALAKVR
Lanosterol synthase	LSS	LSQVPDNPPDYQKYYR
		QLPNGDWPQENIAGVFNKSCAISYTSYR
Dual specificity mitogen-activated protein kinase kinase 2	MAP2K2	GEIKLCDFGVSGQLIDSMANSFVGTR
		KLIHLEIKPAIR
Mitogen-activated protein kinase kinase kinase 1	MAP3K1	LASKGTGAGEFQGQLLGTIAFMAPEVLR
Mitogen-activated protein kinase 14	MAPK14	DLKPSNLAVNEDCELKILDFGLAR
		YQNLSPVGSGAYGSVCAAFDTKTGLR
S-adenosylmethionine synthase isoform type-2	MAT2A	AVVPAKYLDEDTIYHLQPSGR
		KIIVDTYGGWGAHGGGAFSGK
		NGTLPWLRPDSKTQVTVQYMQDR
		IIVDTYGGWGAHGGGAFSGKDYTK
		KNFDLRPGVIVR
Matrin-3	MATR3	ITPENLPQILLQLKR
		IEELDQENEAALENGIKNEENTEPGAESSENADDPNKDTSENADGQSDENKDDYTIPDEYR
		INEAFIEMATTEDAQAAVDYYTTTPALVFGKPVR
		VIHLSNLPHSGYSDSAVLKLAEPYGK
		DLDELSRYPEDKITPENLPQILLQLK
		DLDELSRYPEDKITPENLPQILLQLKR
		SKSFQQSSLSR
		CRDDSFFGETSHNYHKFDSEYER
		YPEDKITPENLPQILLQLKR
DNA replication licensing factor MCM2	MCM2	TSIHEAMEQQSISISKAGIVTSLQAR
		IFASIAPSIYGHEDIKR
		GDINVLLCGDPGTAKSQFLK
		DQQIGEKIFASIAPSIYGHEDIKR
DNA replication licensing factor MCM4	MCM4	SVLHEVMEQQTLSIAKAGIICQLNAR
		FIDPLAKEEENVGIDITEPLYMQR
		LGEINVIGEPFLNVNCEHIKSFDK
		LVIWGTDVNVAACKENFQR
		TSVLAAANPIESQWNPKK
		GSSAVGLTAYVMKDPETR
		LASALAPSIYEHEDIKK
DNA replication licensing factor MCM6	MCM6	DQVAIHEAMEQQTISITKAGVK
		AEAVESAQAGDKCDFTGTLIVVPDVSKLSTPGAR
		EIPLAKDFYVAFQDLPTR
		GDINVCIVGDPSTAKSQFLK
		SLKQNINLSAPIMSR
		AEAVESAQAGDKCDFTGTLIVVPDVSK
		DVEQQFKYTQPNICR
		CQKLFLDFLEEFQSSDGEIK
		MDLAAAAEPGAGSQHLEVRDEVAEKCQK
		GVLLMLFGGVPKTTGEGTSLR
DNA replication licensing factor MCM7	MCM7	FELYFQGPSSNKPR
		RFELYFQGPSSNKPR
		TAIHEVMEQQTISIAKAGILTTLNAR
		EVVNKDVLDVYIEHR
		GNINICLMGDPGVAKSQLLSYIDR
		LFADAVQELLPQYKER
		MVDVVEKEDVNEAIR
		QPPSQFEPLDMKLMR
		LAASIAPEIYGHEDVKK
		ALKDYALEKEK
Methionine aminopeptidase 1	METAP1	NCYPSPLNYYNFPKSCCTSVNEVICHGIPDR
		ELGNIIQKHAQANGFSVVR
		GTSQIKLLSSEDIEGMR
Methylated-DNA--protein-cysteine methyltransferase	MGMT	FGEVISYQQLAALAGNPKAAR
		VVCSSGAVGNYSGGLAVKEWLLAHEGHR
E3 ubiquitin-protein ligase MIB1	MIB1	AGAKLDIQDKDGDTPLHEALR
		DKDNTNVNADVQKLQQQLQDIK
		KLFETQESGDLNEELVK
		LFETQESGDLNEELVKAAANGDVAK
		LLLKQNVDVEAEDKDGDR
		QLQDMQDVGKVDAAWEPSK
		SSEDATDDISSGNIPVLQKDKDNTNVNADVQK
		VDAAWEPSKNTLIMGLGTQGAEK
		VTEIQDWSASSPHSAAYVLWDNGAKNLYR
		KGQSPLDLCPDPNLCKALAK
		VEDLLKRPDVDVNGQCAGHTAMQAASQNGHVDILK
		AAVLFQPCGHMCACENCANLMKK
		LQQQLQDIKEQTMCPVCLDR
Protein Mis18-alpha	MIS18A	EKENGCVLETLCCAGCSLNLGYVYR
		SLTQMEDVLKALQMK
		VEIEKSLTQMEDVLK
Cytochrome c oxidase subunit 2	MT-CO2	MMITSQDVLHSWAVPTLGLKTDAIPGR
C-1-tetrahydrofolate synthase, cytoplasmic	MTHFD1	AAQAPSSFQLLYDLKLPVEDK
		CTHWAEGGKGALALAQAVQR
		EIGLLSEEVELYGETKAK
		MFGIPVVVAVNAFKTDTESELDLISR
		HRPDGKYVVVTGITPTPLGEGK
		LGIEKTDPTTLTDEEINR
		NQVTQLKEQVPGFTPR
		IFHELTQTDKALFNR
		THLSLSHNPEQKGVPTGFILPIR
Myosin-9	MYH9	QTLENERGELANEVKVLLQGK
		NTDQASMPDNTAAQKVSHLLGINVTDFTR
Myosin light polypeptide 6	MYL6	ALGQNPTNAEVLKVLGNPK
Unconventional myosin-Ib	MYO1B	ALYPSSVGQPFQGAYLEINKNPK
		DAIEEKIIIAEVVNK
		LKDAIEEKIIIAEVVNK
Unconventional myosin-Ig	MYO1G	NSMVALVENLASKEPFYVR
		ALLLTDQHLYKLDPDR
		ELYERPPHLYAVANAAYKAMK
		AAVSALLEQHGLQGDVAFGHSKLFIR
		AKVAAMGALQGLR
		DVLLKSTCVLEAFGNAR
		ELIEKGHTAAEASYAR
		GDPIGGHIHSYLLEKSR
		HYAGDVTYSVEGFIDKNR
		IKHYAGDVTYSVEGFIDK
		RPLTAGTLFKNSMVALVENLASK
		QLCPTDKTMEFGR
		SRDTCIVISGESGAGKTEASK
		YMDINFDFKGDPIGGHIHSYLLEKSR
		IKHYAGDVTYSVEGFIDKNR
		AMWPDGQQDITEVTKRPLTAGTLFK
		DFLFQDFKR
		YKMTCEYTWPNHLLGSDK
Marginal zone B- and B1-cell-specific protein	MZB1	GALEALLCGGPQGACSEKVSATR
		GALEALLCGGPQGACSEKVSATREEL
N-alpha-acetyltransferase 50	NAA50	LNQVIFPVSYNDKFYK
		LNQVIFPVSYNDKFYKDVLEVGELAK
Next to BRCA1 gene 1 protein	NBR1	HHHGSSIAGGLVKGALSVAASAYK
Nucleolin	NCL	TGISDVFAKNDLAVVDVR
		SISLYYTGEKGQNQDYR
		ETGSSKGFGFVDFNSEEDAK
		GLSEDTTEETLKESFDGSVR
		NSTWSGESKTLVLSNLSYSATEETLQEVFEK
		TLFVKGLSEDTTEETLKESFDGSVR
		TLVLSNLSYSATEETLQEVFEKATFIK
		VEGTEPTTAFNLFVGNLNFNKSAPELK
		IVTDRETGSSKGFGFVDFNSEEDAK
		GYAFIEFASFEDAKEALNSCNKR
		ALELTGLKVFGNEIK
NEDD4 family-interacting protein 1	NDFIP1	TKAEATIPLVPGR
		TKAEATIPLVPGRDEDFVGR
		YQQLQNEEESGEPEQAAGDAPPPYSSISAESAAYFDYKDESGFPKPPSYNVATTLPSYDEAER
NADH dehydrogenase [ubiquinone] 1 alpha subcomplex subunit 8	NDUFA8	KQQAKFDECVLDK
		KQQAKFDECVLDKLGWVRPDLGELSK
		QQAKFDECVLDK
NEDD8	NEDD8	EIEIDIEPTDKVER
		TLTGKEIEIDIEPTDKVER
		TAADYKILGGSVLHLVLALR
		LIYSGKQMNDEK
Non-POU domain-containing octamer-binding protein	NONO	CSEGSFLLTTFPRPVTVEPMDQLDDEEGLPEKLVIK
		DKGFGFIR
		EKLEMEMEAAR
		GRPSGKGIVEFSGKPAAR
		TLAEIAKVELDNMPLR
		GIVEFSGKPAAR
Vesicle-fusing ATPase	NSF	TALAAKIAEESNFPFIK
		ELAVETKNFSGAELEGLVR
NSFL1 cofactor p47	NSFL1C	LGAAPEEESAYVAGEKR
		LWKSGFSLDNGELR
N-terminal Xaa-Pro-Lys N-methyltransferase 1	NTMT1	EVDMVDITEDFLVQAKTYLGEEGKR
Cancer-related nucleoside-triphosphatase	NTPCR	ASEVLKSSGVPVDGFYTEEVR
Cytosolic Fe-S cluster assembly factor NUBP2	NUBP2	HIILVLSGKGGVGK
		KVGILDVDLCGPSIPR
NudC domain-containing protein 2	NUDCD2	ENPGFDFSGAEISGNYTKGGPDFSNLEK
		GKLFDSTIADEGTWTLEDR
		FQKENPGFDFSGAEISGNYTK
Cleavage and polyadenylation specificity factor subunit 5	NUDT21	GVTQFGNKYIQQTKPLTLER
		LFLVQLQEKALFAVPK
		KLFLVQLQEKALFAVPK
		YIQQTKPLTLER
Oxysterol-binding protein-related protein 8	OSBPL8	GPKGEAVGSITQPLPSSYLIIR
Serine/threonine-protein kinaseR1	OXSR1	KTFVGTPCWMAPEVMEQVR
Proliferation-associated protein 2G4	PA2G4	ITSGPFEPDLYKSEMEVQDAELK
		KADVIKAAHLCAEAALR
		MGVVECAKHELLQPFNVLYEK
		SGEDEQQEQTIAEDLVVTKYK
		SEMEVQDAELKALLQSSASR
		GIAFPTSISVNNCVCHFSPLKSDQDYILK
		LVKPGNQNTQVTEAWNKVAHSFNCTPIEGMLSHQLK
		KGIAFPTSISVNNCVCHFSPLK
Polyadenylate-binding protein 1	PABPC1	VVCDENGSKGYGFVHFETQEAAER
		DLFGKFGPALSVK
		IVATKPLYVALAQR
		YQGVNLYVKNLDDGIDDERLR
		ALYDTFSAFGNILSCKVVCDENGSK
		FGPALSVKVMTDESGK
		SIDNKALYDTFSAFGNILSCK
		SKGFGFVCFSSPEEATK
		ALDTMNFDVIKGKPVR
		GFGFVCFSSPEEATKAVTEMNGR
		SKGFGFVCFSSPEEATKAVTEMNGR
Polyadenylate-binding protein 4	PABPC4	ALDTMNFDVIKGKPIR
		ALYDTFSAFGNILSCKVVCDENGSK
		EFSPFGSITSAKVMLEDGR
		SIDNKALYDTFSAFGNILSCK
		SKGFGFVCFSSPEEATK
		GFGFVCFSSPEEATKAVTEMNGR
		NFGEEVDDESLKELFSQFGKTLSVK
		SKGFGFVCFSSPEEATKAVTEMNGR
Polyadenylate-binding protein 2	PABPN1	APPGAPGPGPGSGAPGSQEEEEEPGLVEGDPGDGAIEDPELEAIKAR
		FSGHPKGFAYIEFSDKESVR
Serine/threonine-protein kinase PAK 2	PAK2	IGQGASGTVFTATDVALGQEVAIKQINLQK
		LTDFGFCAQITPEQSKR
		DIKSDNVLLGMEGSVK
		YEKIGQGASGTVFTATDVALGQEVAIK
		KELIINEILVMKELK
		ALYLIATNGTPELQNPEKLSPIFR
Bifunctional 3'-phosphoadenosine 5'-phosphosulfate synthase 1	PAPSS1	AGEIKGFTGIDSEYEKPEAPELVLK
Protein PAT1 homolog 1	PATL1	IPQAALAKPISIPTNLVSLFSR
Poly(rC)-binding protein 1	PCBP1	CSDAAGYPHATHDLEGPPLDAYSIQGQHTISPLDLAKLNQVAR
		LVVPATQCGSLIGKGGCK
		QMSGAQIKIANPVEGSSGR
		AITIAGVPQSVTECVKQICLVMLETLSQSPQGR
		QQSHFAMMHGGTGFAGIDSSSPEVKGYWASLDASTQTTHELTIPNNLIGCIIGR
		LLMHGKEVGSIIGK
Poly(rC)-binding protein 2	PCBP2	LVVPASQCGSLIGKGGCK
		QMSGAQIKIANPVEGSTDR
		AFAMIIDKLEEDISSSMTNSTAASRPPVTLR
		GVTIPYRPKPSSSPVIFAGGQDR
		LLMHGKEVGSIIGK
		QGAKINEIR
Pericentriolar material 1 protein	PCM1	IQALQTACPDLQLSAASVGNCPTKK
		LIDIQEKIQALQTACPDLQLSAASVGNCPTKK
		LPDEKVELFSK
		MDKLLGELHTLR
		YMPAVTSTPTVNQHETSTSKSVFEPEDSSIVDNELWSEMR
		TEYMAFPKPFESSSSIGAEKPR
		STSAPSASVGLAPVVNGESNSLTSSVPYPTASLVSQNESENEGHLNPSEKLQK
6-phosphofructo-2-kinase/fructose-2,6-bisphosphatase 3	PFKFB3	VWTSQLKSTIQTAEALR
Phosphoglycerate kinase 1	PGK1	DCVGPEVEKACANPAAGSVILLENLR
		VDFNVPMKNNQITNNQR
		AHSSMVGVNLPQKAGGFLMK
		GCITIIGGGDTATCCAKWNTEDK
D-3-phosphoglycerate dehydrogenase	PHGDH	ALVDHENVISCPHLGASTKEAQSR
		AWAGSPKGTIQVITQGTSLK
		FMGTELNGKTLGILGLGR
		GKSLTGVVNAQALTSAFSPHTKPWIGLAEALGTLMR
		GTIQVITQGTSLKNAGNCLSPAVIVGLLK
		KGILVMNTPNGNSLSAAELTCGMIMCLAR
		QADVNLVNAKLLVK
		SLTGVVNAQALTSAFSPHTKPWIGLAEALGTLMR
		VTADVINAAEKLQVVGR
		NAGNCLSPAVIVGLLKEASK
Phosphatidylinositol 4-phosphate 3-kinase C2 domain-containing subunit beta	PIK3C2B	ISQPSDINTFSLVEQLPGKLLEHR
		QNADPSLISWDEPGVDFYSKPAGR
Phosphatidylinositol 4-phosphate 5-kinase type-1 gamma	PIP5K1C	GAIQLGIGYTVGHLSSKPER
1-phosphatidylinositol 4,5-bisphosphate phosphodiesterase gamma-1	PLCG1	VLGDTLLTKPVEISADGLPSPNQLK
Serine/threonine-protein kinase PLK1	PLK1	IGDFGLATKVEYDGER
Protein PML	PML	LQDLSSCITQGKDAAVSK
Paraneoplastic antigen Ma2	PNMA2	KQENANAVLLELLEDTDVSAIPSEVQGKGGVWK
DNA polymerase delta subunit 3	POLD3	SNLQNCSKFSAIQCAAAVPR
DNA-directed RNA polymerase II subunit RPB2	POLR2B	IVATLPYIKQEVPIIIVFR
DNA-directed RNA polymerases I, II, and III subunit RPABC3	POLR2H	AGILFEDIFDVKDIDPEGK
Peptidyl-prolyl cis-trans isomerase A	PPIA	SIYGEKFEDENFILK
		FEDENFILKHTGPGILSMANAGPNTNGSQFFICTAK
		SIYGEKFEDENFILKHTGPGILSMANAGPNTNGSQFFICTAK
		VSFELFADKVPKTAENFR
		HTGPGILSMANAGPNTNGSQFFICTAKTEWLDGK
		TEWLDGKHVVFGK
		HNGTGGKSIYGEKFEDENFILK
Peptidyl-prolyl cis-trans isomerase D	PPID	LQPIALSCVLNIGACKLK
		AQGIAPEDKAIQAELLK
		MSNWQGAIDSCLEALELDPSNTKALYR
		YVDSSKAVIETADR
		ILLITEDLKNIGNTFFK
Serine/threonine-protein phosphatase PP1-alpha catalytic subunit	PPP1CA	GKQSLETICLLLAYK
		LLEVQGSRPGKNVQLTENEIR
		SDSEKLNLDSIIGR
		AHQVVEDGYEFFAKR
		LWKTFTDCFNCLPIAAIVDEK
		TFTDCFNCLPIAAIVDEKIFCCHGGLSPDLQSMEQIR
Nuclear inhibitor of protein phosphatase 1	PPP1R8	LEPHKPQQIPIDSTVSFGASTR
Serine/threonine-protein phosphatase 2A 65 kDa regulatory subunit A beta isoform	PPP2R1B	ITLNDLIPAFQNLLKDCEAEVR
		KLSTIALALGVER
		QISQEHTPVALEAYFVPLVKR
		IGPILDTNALQGEVKPVLQK
		QLSQSLLPAIVELAEDAKWR
Serine/threonine-protein phosphatase 6 catalytic subunit	PPP6C	NQEIPHKGAFCDLVWSDPEDVDTWAISPR
		QITQVYGFYDECQTKYGNANAWR
Peroxiredoxin-1	PRDX1	KLNCQVIGASVDSHFCHLAWVNTPK
		TIAQDYGVLKADEGISFR
		GLFIIDDKGILR
		KQGGLGPMNIPLVSDPKR
		HGEVCPAGWKPGSDTIKPDVQK
		LNCQVIGASVDSHFCHLAWVNTPKK
Protein kinase C eta type	PRKCH	KGHQLLDPYLTVSVDQVR
DNA-dependent protein kinase catalytic subunit	PRKDC	HGDLPDIQIKHSSLITPLQAVAQR
		NLLIFENLIDLKR
		YPDAKMDPMNIWDDIITNR
		DPIIAKQLFSSLFSGILK
		LAAVVSACKQLHR
		TSALSDETKNNWEVSALSR
		AGLLHNILPSQSTDLHHSVGTELLSLVYKGIAPGDER
		AQEPESGLSEETQVKCLMDQATDPNILGR
		AVAFFLESIAMHDIIAAEKCFGTGAAGNR
		DLLLNTMSQEEKAAYLSDPR
		ECSPWMSDFKVEFLR
		EKITAQSIEELCAVNLYGPDAQVDR
		EMKPVIFLDVFLPR
		IAPYSVEIKNTCTSVYTK
		ILELSGSSSEDSEKVIAGLYQR
		LPVLAGCLKGLSSLLCNFTK
		LSDFNDITNMLLLKMNK
		LTKLQSVQALTEIQEFISFISK
		QKVCLDIIYK
		SIELFYKFVPLLPGNR
		TLIKLCYDAFTENMAGENQLLER
		TVSLLDENNVSSYLSKNILAFR
		GIFTSEIGTKQITQSALLAEAR
		IIANALSSEPACLAEIEEDKARR
		KEEENASVIDSAELQAYPALVVEKMLK
		LAGANPAVITCDELLLGHEKAPAFR
		LQSVQALTEIQEFISFISKQGNLSSQVPLKR
		SDPGLLTNTMDVFVKEPSFDWK
		SSFDWLTGSSTDPLVDHTSPSSDSLLFAHKR
		TKNLSSNEAISLEEIR
		HDVGAYMLMYKGANR
		LAKDVLIQGLIDENPGLQLIIR
		IIANALSSEPACLAEIEEDKAR
		SQGCSEQVLTVLKTVSLLDENNVSSYLSK
		INQVFHGSCITEGNELTKTLIK
		NILEESLCELVAKQLK
		VINAKDVDFMYVELIQR
Pre-mRNA-processing-splicing factor 8	PRPF8	ANIPWKVPGLPTPIENMILR
Proteasome subunit alpha type-5	PSMA5	AIGSASEGAQSSLQEVYHKSMTLK
		LGSTAIGIQTSEGVCLAVEKR
		IVEIDAHIGCAMSGLIADAKTLIDK
Proteasome subunit beta type-2	PSMB2	ILLLCVGEAGDTVQFAEYIQKNVQLYK
26S proteasome regulatory subunit 4	PSMC1	DDLSGADIKAICTEAGLMALR
		MTLADDVTLDDLIMAKDDLSGADIK
		TLLAKAVANQTSATFLR
		VAEEHAPSIVFIDEIDAIGTKR
		IKDYLLMEEEFIR
26S proteasome regulatory subunit 6B	PSMC4	VVGSEFVQKYLGEGPR
		ENAPAIIFIDEIDAIATKR
26S proteasome non-ATPase regulatory subunit 2	PSMD2	DAGDKDKEQELSEEDKQLQDELEMLVER
		EWQELDDAEKVQR
		EWQELDDAEKVQREPLLTLVK
		LALMLNDMELVEDIFTSCKDVVVQK
		LGEKDTSLYRPALEELRR
		YLYSSEDYIKSGALLACGIVNSGVR
		LGEKDTSLYRPALEELR
26S proteasome non-ATPase regulatory subunit 3	PSMD3	AKPPPGGGEQEPPPPPAPQDVEMKEEAATGGGSTGEADGK
		AKPPPGGGEQEPPPPPAPQDVEMKEEAATGGGSTGEADGKTAAAAAEHSQR
Polypyrimidine tract-binding protein 1	PTBP1	ITLSKHQNVQLPR
		VLFSSNGGVVKGFK
Prostaglandin E synthase 3	PTGES3	LTFSCLGGSDNFKHLNEIDLFHCIDPNDSK
		KGESGQSWPR
		AKLNWLSVDFNNWKDWEDDSDEDMSNFDR
		HLNEIDLFHCIDPNDSKHKR
Tyrosine-protein phosphatase non-receptor type 14	PTPN14	QKMAGLEAQK
Tyrosine-protein phosphatase non-receptor type 6	PTPN6	AYGPYSVTNCGEHDTTEYKLR
		DSNIPGSDYINANYIKNQLLGPDENAK
Glutamine--tRNA ligase	QARS	LGYFSVDPDSHQGKLVFNR
Ras-related protein Rab-11B	RAB11B	AFAEKNNLSFIETSALDSTNVEEAFK
Ras-related protein Rab-14	RAB14	KFMADCPHTIGVEFGTR
		IYQNIQDGSLDLNAAESGVQHKPSAPQGGR
Ras-related protein Rab-2A	RAB2A	TASNVEEAFINTAKEIYEK
Ras-related protein Rab-7a	RAB7A	FSNQYKATIGADFLTK
		NALKQETEVELYNEFPEPIKLDKNDR
		QETEVELYNEFPEPIKLDKNDR
		ATIGADFLTKEVMVDDR
		NALKQETEVELYNEFPEPIKLDK
Receptor of activated protein C kinase 1	RACK1	DGQAMLWDLNEGKHLYTLDGGDIINALCFSPNR
		FSPNSSNPIIVSCGWDKLVK
		FVGHTKDVLSVAFSSDNR
		GTLKGHNGWVTQIATTPQFPDMILSASR
		IIVDELKQEVISTSSKAEPPQCTSLAWSADGQTLFAGYTDNLVR
		LKTNHIGHTGYLNTVTVSPDGSLCASGGK
		LWNTLGVCKYTVQDESHSEWVSCVR
		QEVISTSSKAEPPQCTSLAWSADGQTLFAGYTDNLVR
		RFVGHTKDVLSVAFSSDNR
		YWLCAATGPSIKIWDLEGK
		TNHIGHTGYLNTVTVSPDGSLCASGGKDGQAMLWDLNEGK
		IIVDELKQEVISTSSK
E3 ubiquitin-protein ligase RAD18	RAD18	NLAVKVYTPVASR
		SVEEIAPDPSEAKRPEPPSTSTLK
		SVEEIAPDPSEAKRPEPPSTSTLKQVTK
		VDCPVCGVNIPESHINKHLDSCLSR
		LEASKLNESVMVFTK
UV excision repair protein RAD23 homolog A	RAD23A	EDKSPSEESAPTTSPESVSGSVPSSGSSGR
		HQEQFIQMLNEPPGELADISDVEGEVGAIGEEAPQMNYIQVTPQEKEAIER
		IDEKNFVVVMVTK
		LIYAGKILSDDVPIR
		LIYAGKILSDDVPIRDYR
		NFVVVMVTKTK
		AVTITLKTLQQQTFK
		EDKSPSEESAPTTSPESVSGSVPSSGSSGREEDAASTLVTGSEYETMLTEIMSMGYER
		TLQQQTFKIR
UV excision repair protein RAD23 homolog B	RAD23B	ENPQLLQQISQHQEHFIQMLNEPVQEAGGQGGGGGGGSGGIAEAGSGHMNYIQVTPQEKEAIER
		IDEKNFVVVMVTKPK
		NFVVVMVTKPK
		QEKPAEKPAETPVATSPTATDSTSGDSSR
		LIYAGKILNDDTALKEYK
		LIYAGKILNDDTALK
RNA-binding protein Raly	RALY	VAGCSVHKGYAFVQYSNER
Ran-specific GTPase-activating protein	RANBP1	ICANHYITPMMELKPNAGSDR
		TLEEDEEELFKMR
Ras GTPase-activating protein 2	RASA2	IVGGHYLKVTLKPILDEICDSSK
Retinoblastoma-associated protein	RB1	ILVSIGESFGTSEKFQK
		IMESLAWLSDSPLFDLIKQSK
		FAKAVGQGCVEIGSQR
		LEFEETEEPDFTALCQKLK
RNA-binding protein 4	RBM4	TPYTMSYGDSLYYNNAYGALDAYYKR
		SLFEQYGKVLECDIIK
Retinol dehydrogenase 11	RDH11	DVEKGELVAKEIQTTTGNQQVLVR
		LKGSGVTTYSVHPGTVQSELVR
		MLSSGVCTSTVQLPGKVVVVTGANTGIGK
		GELVAKEIQTTTGNQQVLVR
		VVVVTGANTGIGKETAK
Replication factor C subunit 2	RFC2	EGNVPNIIIAGPPGTGKTTSILCLAR
		ALLGPALKDAMLELNASNDR
E3 ubiquitin-protein ligase RNF13	RNF13	KGDEYDVCAICLDEYEDGDKLR
		FKKGDEYDVCAICLDEYEDGDKLR
E3 ubiquitin-protein ligase RNF168	RNF168	LLALQLQKEVDKEQMVPNR
		YLTPKSQFGSASHSEAVQEVR
E3 ubiquitin-protein ligase RNF213	RNF213	VTCRPPKEVIDMELSALR
		GSPNETELIESAKGICSSDILVQDR
		LVKVHGGTTADMIYSR
		VPELQGLVTEHVFLLDKCLR
		DLVKQFQNVQQVEYSSIR
		VMEELPLMLLSEFSLVDKLR
		VSEEAKSILLNCATPDAVVR
		LVKFLPEILALQR
		SLAKTIVADAMQGPAAYSDLFR
		APKPTLLWLQQFDTEYSFLKEVR
		NFSGKDDIQALDIFLANLPEAK
		LLNFDTELSTKEMR
E3 ubiquitin-protein ligase BRE1B	RNF40	LGGISSTEEMDLKVLQFK
Ribonuclease inhibitor	RNH1	IQKLSLQNCCLTGAGCGVLSSTLR
		LLCETLLEPGCQLESLWVKSCSFTAACCSHFSSVLAQNR
60S ribosomal protein L22	RPL22	VNGKAGNLGGGVVTIER
		IKVNGKAGNLGGGVVTIER
60S ribosomal protein L24	RPL24	VELCSFSGYKIYPGHGR
		AITGASLADIMAKR
60S ribosomal protein L3	RPL3	AHLMEIQVNGGTVAEKLDWAR
		ERLEQQVPVNQVFGQDEMIDVIGVTKGK
		IDLKFIDTTSK
		SINPLGGFVHYGEVTNDFVMLKGCVVGTK
60S acidic ribosomal protein P0	RPLP0	CFIVGADNVGSKQMQQIR
		IIQLLDDYPKCFIVGADNVGSK
		NVASVCLQIGYPTVASVPHSIINGYKR
		AGAIAPCEVTVPAQNTGLGPEKTSFFQALGITTK
		GHLENNPALEKLLPHIR
		GNVGFVFTKEDLTEIR
		SNYFLKIIQLLDDYPK
		TSFFQALGITTKISR
		GNVGFVFTKEDLTEIRDMLLANKVPAAAR
40S ribosomal protein S12	RPS12	AEEGIAAGGVMDVNTALQEVLKTALIHDGLAR
		LGEWVGLCKIDR
40S ribosomal protein S17	RPS17	EMLKLLDFGSLSNLQVTQPTVGMNFK
40S ribosomal protein S24	RPS24	TTGFGMIYDSLDYAKK
40S ribosomal protein S3	RPS3	FGFPEGSVELYAEKVATR
		FVADGIFKAELNEFLTR
		GCEVVVSGKLR
		IMLPWDPTGKIGPK
		KPLPDHVSIVEPKDEILPTTPISEQK
		FIMESGAKGCEVVVSGK
40S ribosomal protein S5	RPS5	NIKTIAECLADELINAAK
		TIAECLADELINAAKGSSNSYAIK
		WSTDDVQINDISLQDYIAVKEK
		LFGKWSTDDVQINDISLQDYIAVK
40S ribosomal protein S8	RPS8	ADGYVLEGKELEFYLR
		ISSLLEEQFQQGKLLACIASRPGQCGR
40S ribosomal protein SA	RPSA	AVLKFAAATGATPIAGR
		FLAAGTHLGGTNLDFQMEQYIYKR
		YVDIAIPCNNKGAHSVGLMWWMLAR
		SGALDVLQMKEEDVLK
Ribosomal RNA processing protein 1 homolog A	RRP1	VGAEELTADQNLKFIDPFCR
tRNA-splicing ligase RtcB homolog	RTCB	GLPQLGTLGAGNHYAEIQVVDEIFNEYAAKK
		IASPEGQDYLKGMAAAGNYAWVNR
		TNLDESDVQPVKEQLAQAMFDHIPVGVGSK
		GGGVGGFLPAMKQIGNVAALPGIVHR
RNA transcription, translation and transport factor protein	RTRAF	EGLPVALDKHILGFDTGDAVLNEAAQILR
		LTALDYHNPAGFNCKDETEFR
		TADNATKNAEPLINLDVNNPDFK
		NAEPLINLDVNNPDFKAGVMALANLLQIQR
Splicing factor, arginine/serine-rich 19	SCAF1	AIQQAVGSSLQGDLPNDKDGSR
Secretory carrier-associated membrane protein 3	SCAMP3	LSPTEPKNYGSYSTQASAAAATAELLK
		NYGSYSTQASAAAATAELLKK
		TGASFQKAQQEFAAGVFSNPAVR
		KLSPTEPKNYGSYSTQASAAAATAELLK
Nucleoporin SEH1	SEH1L	IYEAPDVMNLSQWSLQHEISCKLSCSCISWNPSSSR
Septin-1	SEPT1	VNIIPVIGKADALMPQETQALK
Septin-6	SEPT6	STLMDTLFNTKFEGEPATHTQPGVQLQSNTYDLQESNVR
		TVPLAGHVGFDSLPDQLVNKSVSQGFCFNILCVGETGLGK
Septin-9	SEPT9	NEKAPVDFGYVGIDSILEQMR
		ITADLLSNGIDVYPQKEFDEDSEDRLVNEKFR
		THMQNIKDITSSIHFEAYR
		VVNIVPVIAKADTLTLEER
		ITADLLSNGIDVYPQKEFDEDSEDRLVNEK
Splicing factor 3B subunit 5	SF3B5	FNLMEKMLQPCGPPADKPEEN
Splicing factor, proline- and glutamine-rich	SFPQ	ALAEIAKAELDDTPMR
		CSEGVFLLTTTPRPVIVEPLEQLDDEDGLPEKLAQK
		LFVGNLPADITEDEFKR
		ISDSEGFKANLSLLR
		LFAKYGEPGEVFINK
		STGKGIVEFASKPAAR
SH2 domain-containing protein 1A	SH2D1A	NLISAFQKPDQGIVIPLQYPVEK
Mitochondrial 2-oxoglutarate/malate carrier protein	SLC25A11	AATASAGAGGIDGKPR
Equilibrative nucleoside transporter 1	SLC29A1	LEGPGEQETKLDLISK
		LVFVPLLLLCNIKPR
Solute carrier family 2, facilitated glucose transporter member 1	SLC2A1	GTADVTHDLQEMKEESR
Sodium-coupled neutral amino acid transporter 2	SLC38A2	FSISPDEDSSSYSSNSDFNYSYPTKQAALK
		QAALKSHYADVDPENQNFLLESNLGK
		SHYADVDPENQNFLLESNLGKK
Structural maintenance of chromosomes protein 1A	SMC1A	TVALDGTLFQKSGVISGGASDLK
Structural maintenance of chromosomes protein 2	SMC2	VLNMKPPEILSMIEEAAGTR
		SIILEGFKSYAQR
		VALGNTWKENLTELSGGQR
Staphylococcal nuclease domain-containing protein 1	SND1	VITEYLNAQESAKSAR
		NLPGLVQEGEPFSEEATLFTKELVLQR
		EADGSETPEPFAAEAKFFTESR
		EVCFTIENKTPQGR
		VWAHYEEQPVEEVMPVLEEKER
		RGEFCIAKFVDGEWYR
Small nuclear ribonucleoprotein Sm D3	SNRPD3	FLILPDMLKNAPMLK
		SIGVPIKVLHEAEGHIVTCETNTGEVYR
		GKLIEAEDNMNCQMSNITVTYR
Small nuclear ribonucleoprotein-associated protein N	SNRPN	GENLVSMTVEGPPPKDTGIAR
Serrate RNA effector molecule homolog	SRRT	TFKEFLLSLDDSVDETEAVKR
		MLDAAVIKMEGGTENDLR
		SVNIKEICWNLQNIR
Serine/arginine-rich splicing factor 6	SRSF6	NGYGFVEFEDSRDADDAVYELNGKELCGER
Sjoegren syndrome/scleroderma autoantigen 1	SSSCA1	ALNGAEVDDFSWEPPTEAETKVLQAR
		EHQLASASELPLGSRPAPQPPVPRPEHCEGAAAGLKAAQGPPAPAVPPNTDVMACTQTALLQK
		IYCVACQELDSDVDKDNPALNAQAALSQAR
		KIYCVACQELDSDVDKDNPALNAQAALSQAR
		MLGETCADCGTILLQDKQR
Signal transducer and activator of transcription 1-alpha/beta	STAT1	GLNVDQLNMLGEKLLGPNASPDGLIPWTR
Serine/threonine-protein kinase 26	STK26	LADFGVAGQLTDTQIKR
		MVKKLIEKFQK
Syntaxin-7	STX7	ISSNIQKITQCSVEIQR
Protein SGT1 homolog	SUGT1	LVGEIKEEEKNEKLEGDAALNR
		QFVADVKNLYPSSSPYTR
		AYCHILLGNYCVAVADAKK
Small ubiquitin-related modifier 4	SUMO4	TENNNHINLKVAGQDGSVVQFK
		VAGQDGSVVQFKIK
Heterogeneous nuclear ribonucleoprotein Q	SYNCRIP	NLANTVTEEILEKAFSQFGK
		VWGNVGTVEWADPIEDPDPEVMAKVK
		DLFEDELVPLFEKAGPIWDLR
		KYGGPPPDSVYSGQQPSVGTEIFVGKIPR
		YGGPPPDSVYSGQQPSVGTEIFVGKIPR
Transgelin-2	TAGLN2	NFSDNQLQEGKNVIGLQMGTNR
		YGINTTDIFQTVDLWEGKNMACVQR
		IEKQYDADLEQILIQWITTQCR
		DGTVLCELINALYPEGQAPVKK
Transaldolase	TALDO1	LVPVLSAKAAQASDLEK
		ALAGCDFLTISPKLLGELLQDNAK
		LLGELLQDNAKLVPVLSAK
TRAF family member-associated NF-kappa-B activator	TANK	DEEDTSFESLSKFNVK
		FNVKFPPMDNDSTFLHSTPERPGILSPATSEAVCQEK
		LNIPDTATETQCSVPIQCTDKTDKQEALFKPQAK
		DNPGNFVKTEETLFEIQGIDPIASAIQNLK
		TEETLFEIQGIDPIASAIQNLKTTDK
TAR DNA-binding protein 43	TARDBP	AFAFVTFADDQIAQSLCGEDLIIKGISVHISNAEPK
		AVQKTSDLIVLGLPWK
		FTEYETQVKVMSQR
		TTEQDLKEYFSTFGEVLMVQVK
		LPNSKQSQDEPLR
		TSDLIVLGLPWKTTEQDLK
Tax1-binding protein 1	TAX1BP1	CDQLQAEQKGLTEVTQSLK
Transcription elongation factor A protein-like 2	TCEAL2	QYKEAIHDMNFSNEDMIR
Transcription elongation factor A protein-like 4	TCEAL4	EYKEAIHDMNFSNEDMIR
T-complex protein 1 subunit alpha	TCP1	SLKFATEAAITILR
		IAKASGATILSTLANLEGEETFEAAMLGQAEEVVQER
		SLLVIPNTLAVNAAQDSTDLVAKLR
		VLESKSVVPGGGAVEAALSIYLENYATSMGSR
		MLVDDIGDVTITNDGATILKLLEVEHPAAK
Mitochondrial import inner membrane translocase subunit TIM50	TIMM50	TVLEHYALEDDPLAAFKQR
		VLLDLSAFLKTIALNGVEDVR
Mitochondrial import inner membrane translocase subunit Tim9	TIMM9	FQEYHIQQNEALAAKAGLLGQPR
		LTETCFLDCVKDFTTR
Calcium load-activated calcium channel	TMCO1	VVAKLPFTPLSYIQGLSHR
Transmembrane protein 209	TMEM209	VKLGSPDSTSPSSSPTFWNYSR
Transportin-3	TNPO3	SLDSFLLSPEAAVGLLKGTALVLAR
Target of Myb protein 1	TOM1	TGQTTKAPSEAEPAADLIDMGPDPAATGNLSSQLAGMNLGSSSVR
		IEKATDGSLQSEDWALNMEICDIINETEEGPKDALR
Tropomyosin alpha-4 chain	TPM4	AGLNSLEAVKR
Transformer-2 protein homolog beta	TRA2B	EVFSKYGPIADVSIVYDQQSR
TNF receptor-associated factor 4	TRAF4	CEFCGCDFSGEAYESHEGMCPQESVYCENKCGAR
		CPEDQLPLDYAKIYPDPELEVQVLGLPIR
		EDLPGHLKDSCNTALVLCPFK
		LKCEFCGCDFSGEAYESHEGMCPQESVYCENKCGAR
		LKCEFCGCDFSGEAYESHEGMCPQESVYCENK
Transcription intermediary factor 1-beta	TRIM28	APGPLSKQGSGSSQPMEVQEGYGFGSGDDPYSSAEPHVSGVK
		LQEKLSPPYSSPQEFAQDVGR
		FQWDLNAWTKSAEAFGK
		TVYCNVHKHEPLVLFCESCDTLTCR
		VLVNDAQKVTEGQQER
		QFNKLTEDKADVQSIIGLQR
		QGSGSSQPMEVQEGYGFGSGDDPYSSAEPHVSGVKR
		FASWALESDNNTALLLSKK
		SAEAFGKIVAERPGTNSTGPAPMAPPR
		APGPLSKQGSGSSQPMEVQEGYGFGSGDDPYSSAEPHVSGVKR
		LDLDLTADSQPPVFKVFPGSTTEDYNLIVIER
Tubulin--tyrosine ligase-like protein 12	TTLL12	AFTELFQVACAKPPPLGLCDYPSSR
		LLHKLEHEVFDAGEVFGIMQVEEVEEEEDEAAR
		LSQERPGVLLNQFPCENLLTVKDCLASIAR
		QQPNPGNELCYKVIVTR
		FTLTQSEADADILFNFSHFKDYR
		KQQPNPGNELCYKVIVTR
Tubulin alpha-1A chain	TUBA1A	AYHEQLSVAEITNACFEPANQMVKCDPR
		GDVVPKDVNAAIATIK
		GHYTIGKEIIDLVLDR
		QLFHPEQLITGKEDAANNYAR
		TIGGGDDSFNTFFSETGAGKHVPR
		VGINYQPPTVVPGGDLAKVQR
		HGKYMACCLLYR
		IHFPLATYAPVISAEKAYHEQLSVAEITNACFEPANQMVK
		KLADQCTGLQGFLVFHSFGGGTGSGFTSLLMER
		FDLMYAKR
		DVNAAIATIKTK
		ECISIHVGQAGVQIGNACWELYCLEHGIQPDGQMPSDKTIGGGDDSFNTFFSETGAGK
		IHFPLATYAPVISAEKAYHEQLSVAEITNACFEPANQMVKCDPR
		LDHKFDLMYAK
		LDHKFDLMYAKR
		MRECISIHVGQAGVQIGNACWELYCLEHGIQPDGQMPSDKTIGGGDDSFNTFFSETGAGK
		SKLEFSIYPAPQVSTAVVEPYNSILTTHTTLEHSDCAFMVDNEAIYDICR
		TIQFVDWCPTGFKVGINYQPPTVVPGGDLAK
		TIQFVDWCPTGFKVGINYQPPTVVPGGDLAKVQR
		SKLEFSIYPAPQVSTAVVEPYNSILTTHTTLEHSDCAFMVDNEAIYDICRR
		DVNAAIATIKTKR
		GDVVPKDVNAAIATIKTK
Tubulin alpha-1B chain	TUBA1B	AYHEQLSVAEITNACFEPANQMVKCDPR
		GDVVPKDVNAAIATIK
		GHYTIGKEIIDLVLDR
		QLFHPEQLITGKEDAANNYAR
		TIGGGDDSFNTFFSETGAGKHVPR
		VGINYQPPTVVPGGDLAKVQR
		HGKYMACCLLYR
		IHFPLATYAPVISAEKAYHEQLSVAEITNACFEPANQMVK
		KLADQCTGLQGFLVFHSFGGGTGSGFTSLLMER
		FDLMYAKR
		DVNAAIATIKTK
		ECISIHVGQAGVQIGNACWELYCLEHGIQPDGQMPSDKTIGGGDDSFNTFFSETGAGK
		IHFPLATYAPVISAEKAYHEQLSVAEITNACFEPANQMVKCDPR
		LDHKFDLMYAK
		LDHKFDLMYAKR
		MRECISIHVGQAGVQIGNACWELYCLEHGIQPDGQMPSDKTIGGGDDSFNTFFSETGAGK
		RSIQFVDWCPTGFKVGINYQPPTVVPGGDLAK
		SIQFVDWCPTGFKVGINYQPPTVVPGGDLAK
		SIQFVDWCPTGFKVGINYQPPTVVPGGDLAKVQR
		SKLEFSIYPAPQVSTAVVEPYNSILTTHTTLEHSDCAFMVDNEAIYDICR
		SKLEFSIYPAPQVSTAVVEPYNSILTTHTTLEHSDCAFMVDNEAIYDICRR
		DVNAAIATIKTKR
		GDVVPKDVNAAIATIKTK
Tubulin alpha-1C chain	TUBA1C	AYHEQLTVAEITNACFEPANQMVKCDPR
		GDVVPKDVNAAIATIK
		GHYTIGKEIIDLVLDR
		QLFHPEQLITGKEDAANNYAR
		TIGGGDDSFNTFFSETGAGKHVPR
		VGINYQPPTVVPGGDLAKVQR
		HGKYMACCLLYR
		KLADQCTGLQGFLVFHSFGGGTGSGFTSLLMER
		FDLMYAKR
		DVNAAIATIKTK
		ECISIHVGQAGVQIGNACWELYCLEHGIQPDGQMPSDKTIGGGDDSFNTFFSETGAGK
		LDHKFDLMYAK
		LDHKFDLMYAKR
		MRECISIHVGQAGVQIGNACWELYCLEHGIQPDGQMPSDKTIGGGDDSFNTFFSETGAGK
		SKLEFSIYPAPQVSTAVVEPYNSILTTHTTLEHSDCAFMVDNEAIYDICR
		TIQFVDWCPTGFKVGINYQPPTVVPGGDLAK
		TIQFVDWCPTGFKVGINYQPPTVVPGGDLAKVQR
		SKLEFSIYPAPQVSTAVVEPYNSILTTHTTLEHSDCAFMVDNEAIYDICRR
		DVNAAIATIKTKR
		GDVVPKDVNAAIATIKTK
Tubulin beta chain	TUBB	ALTVPELTQQVFDAKNMMAACDPR
		EAESCDCLQGFQLTHSLGGGTGSGMGTLLISKIR
		EIVHIQAGQCGNQIGAKFWEVISDEHGIDPTGTYHGDSDLQLDR
		EVDEQMLNVQNKNSSYFVEWIPNNVK
		ISVYYNEATGGKYVPR
		KEAESCDCLQGFQLTHSLGGGTGSGMGTLLISK
		MAVTFIGNSTAIQELFKR
		MSMKEVDEQMLNVQNK
		NSSYFVEWIPNNVKTAVCDIPPR
		SGPFGQIFRPDNFVFGQSGAGNNWAKGHYTEGAELVDSVLDVVR
		TLKLTTPTYGDLNHLVSATMSGVTTCLR
		KLAVNMVPFPR
		KEAESCDCLQGFQLTHSLGGGTGSGMGTLLISKIR
		TAVCDIPPRGLKMAVTFIGNSTAIQELFKR
		EAESCDCLQGFQLTHSLGGGTGSGMGTLLISKIREEYPDR
		GLKMAVTFIGNSTAIQELFK
		IMNTFSVVPSPKVSDTVVEPYNATLSVHQLVENTDETYCIDNEALYDICFR
		MREIVHIQAGQCGNQIGAKFWEVISDEHGIDPTGTYHGDSDLQLDR
		SGPFGQIFRPDNFVFGQSGAGNNWAKGHYTEGAELVDSVLDVVRK
		GLKMAVTFIGNSTAIQELFKR
		KEAESCDCLQGFQLTHSLGGGTGSGMGTLLISKIREEYPDR
Tubulin beta-2B chain	TUBB2B	ESESCDCLQGFQLTHSLGGGTGSGMGTLLISKIR
		EVDEQMLNVQNKNSSYFVEWIPNNVK
		MSMKEVDEQMLNVQNK
		NSSYFVEWIPNNVKTAVCDIPPR
		SGPFGQIFRPDNFVFGQSGAGNNWAKGHYTEGAELVDSVLDVVR
		TLKLTTPTYGDLNHLVSATMSGVTTCLR
		KLAVNMVPFPR
		MSATFIGNSTAIQELFKR
		SGPFGQIFRPDNFVFGQSGAGNNWAKGHYTEGAELVDSVLDVVRK
		KESESCDCLQGFQLTHSLGGGTGSGMGTLLISKIR
Tubulin beta-3 chain	TUBB3	ALTVPELTQQMFDAKNMMAACDPR
		KLAVNMVPFPR
		TLKLATPTYGDLNHLVSATMSGVTTSLR
Tubulin beta-4B chain	TUBB4B	EAESCDCLQGFQLTHSLGGGTGSGMGTLLISKIR
		EVDEQMLNVQNKNSSYFVEWIPNNVK
		KEAESCDCLQGFQLTHSLGGGTGSGMGTLLISK
		MSMKEVDEQMLNVQNK
		NSSYFVEWIPNNVKTAVCDIPPR
		SGPFGQIFRPDNFVFGQSGAGNNWAKGHYTEGAELVDSVLDVVR
		TLKLTTPTYGDLNHLVSATMSGVTTCLR
		EIVHLQAGQCGNQIGAKFWEVISDEHGIDPTGTYHGDSDLQLER
		KLAVNMVPFPR
		KEAESCDCLQGFQLTHSLGGGTGSGMGTLLISKIR
		ALTVPELTQQMFDAKNMMAACDPR
		EAESCDCLQGFQLTHSLGGGTGSGMGTLLISKIREEYPDR
		IMNTFSVVPSPKVSDTVVEPYNATLSVHQLVENTDETYCIDNEALYDICFR
		INVYYNEATGGKYVPR
		MSATFIGNSTAIQELFKR
		SGPFGQIFRPDNFVFGQSGAGNNWAKGHYTEGAELVDSVLDVVRK
		KEAESCDCLQGFQLTHSLGGGTGSGMGTLLISKIREEYPDR
Tubby-related protein 3	TULP3	QELAAISYETNVLGFKGPR
Thioredoxin domain-containing protein 17	TXNDC17	DAGGKSWCPDCVQAEPVVR
		HISEGCVFIYCQVGEKPYWKDPNNDFRK
		VTAVPTLLKYGTPQK
Thioredoxin-like protein 1	TXNL1	LAVVKFTMR
		LYSMKFQGPDNGQGPK
		IDQYQGADAVGLEEKIK
		VRIDQYQGADAVGLEEKIK
Splicing factor U2AF 35 kDa subunit	U2AF1	AEYLASIFGTEKDKVNCSFYFK
		FRREEDAEKAVIDLNNR
Ubiquitin-like modifier-activating enzyme 1	UBA1	KPLLESGTLGTKGNVQVVIPFLTESYSSSQDPPEK
		LIAGKIIPAIATTTAAVVGLVCLELYK
		QKYFLVGAGAIGCELLK
		QLLHNFPPDQLTSSGAPFWSGPKR
		SGVKIHVSDQELQSANASVDDSRLEELK
		SIPICTLKNFPNAIEHTLQWAR
		QLDSYKNGFLNLALPFFGFSEPLAAPR
		DEFEGLFKQPAENVNQYLTDPK
		GIKLVVADTR
		GNVQVVIPFLTESYSSSQDPPEKSIPICTLK
		YDGQVAVFGSDLQEKLGK
Ubiquitin-like modifier-activating enzyme 5	UBA5	LFFQPHQAGLSKVQAAEHTLR
Ubiquitin-associated protein 2-like	UBAP2L	DGSLASNPYSGDLTKFGR
Ubiquitin-associated and SH3 domain-containing protein A	UBASH3A	AWLQQCSTPDGKYYRPDLNFPCSLPR
		KIPSLGMCFCEENKEEGKWELVNPPVK
Ubiquitin-conjugating enzyme E2 N	UBE2N	ICLDILKDK
		ICLDILKDKWSPALQIR
		IYHPNVDKLGR
Uridine 5'-monophosphate synthase	UMPS	FGDFVLKSGLSSPIYIDLR
Protein unc-13 homolog D	UNC13D	IQQQAETTSEELGAVTVKASYR
		LVIGKLPAQLAWEALEQR
		WFQPAIPSWLQKTYNEALAR
Ubiquitin carboxyl-terminal hydrolase 14	USP14	KQDEWIKFDDDKVSIVTPEDILR
		LEAIEDDSVKETDSSSASAATPSK
		VLQQKLEAIEDDSVKETDSSSASAATPSK
		FPLMLDMYELCTPELQEKMVSFR
		LEAIEDDSVKETDSSSASAATPSKK
		LQEEITKQSPTLQR
		SSSSGHYVSWVKR
		YLFTGLKLR
Ubiquitin carboxyl-terminal hydrolase 20	USP20	QSVAQPLGPENLHGEQKIEAETR
Ubiquitin carboxyl-terminal hydrolase 7	USP7	REDYYDIQLSIKGK
		FMYDPQTDQNIKINDR
Probable ubiquitin carboxyl-terminal hydrolase FAF-X	USP9X	DDVFGYPQQFEDKPALSK
U3 small nucleolar RNA-associated protein 18 homolog	UTP18	VLYVYDMLAGKLIPVHQVR
Proto-oncogene vav	VAV1	EDVQMKLEECSQR
		GLTELVEFYQQNSLKDCFK
		IDGELKITSVER
		EVNLRPQMSQFLCLKNIR
Vimentin	VIM	QVQSLTCEVDALKGTNESLER
		LLQDSVDFSLADAINTEFKNTR
		FLEQQNKILLAELEQLKGQGK
		KLHEEEIQELQAQIQEQHVQIDVDVSKPDLTAALR
		LHEEEIQELQAQIQEQHVQIDVDVSKPDLTAALR
		QQYESVAAKNLQEAEEWYK
		TNEKVELQELNDR
		ILLAELEQLKGQGK
		ILLAELEQLKGQGKSR
		LQDEIQNMKEEMAR
		QAKQESTEYRR
		SKFADLSEAANR
Very low-density lipoprotein receptor	VLDLR	SMNFDNPVYLKTTEEDLSIDIGR
Serine/threonine-protein kinase VRK1	VRK1	ASNLLLNYKNPDQVYLVDYGLAYR
		VEPSDNGPLFTELKFYQR
		HLAEQFAVGEIITDMAKK
		YMETVKLLDYTEKPLYENLR
		KEWKVGLPIGQGGFGCIYLADMNSSESVGSDAPCVVK
Vesicle transport through interaction with t-SNAREs homolog 1B	VTI1B	ASSAASSEHFEKLHEIFR
WD repeat-containing protein 1	WDR1	YAPSGFYIASGDVSGKLR
		SYIYSGSHDGHINYWDSETGENDSFAGKGHTNQVSR
		FATASADGQIYIYDGKTGEK
		KCFSIDNPGYEPEVVAVHPGGDTVAIGGVDGNVR
		LLEAKGPVTDVAYSHDGAFLAVCDASK
		NIDNPALADIYTEHAHQVVVAKYAPSGFYIASGDVSGK
		DYSGQGVVKLDVQPK
		LATGSDDNCAAFFEGPPFKFK
		LYSILGTTLKDEGKLLEAK
ATPase WRNIP1	WRNIP1	GYKYNPMYSEPVDQEYLPEELR
		SIEVYSAYNNVKACLR
		VLITENDVKEGLQR
		FVTLSATNAKTNDVR
		KTILFIDEIHR
DNA repair protein complementing XP-C cells	XPC	EENDLGLFGYWQTEEYQPPVAVDGKVPR
		SLLPVKPVEIEIETPEQAKTR
		SLLPVKPVEIEIETPEQAK
Exportin-1	XPO1	EFMKDTDSINLYKNMR
		LLSEEVFDFSSGQITQVKSK
		DTDSINLYKNMR
		MAQEVLTHLKEHPDAWTR
X-ray repair cross-complementing protein 5	XRCC5	TDTLEDLFPTTKIPNPR
		ETVYCLNDDDETEVLKEDIIQGFR
		CFSVLGFCKSSQVQR
		EPLPPIQQHIWNMLNPPAEVTTKSQIPLSK
		IQPGSQQADFLDALIVSMDVIQHETIGKK
		KLKTEQGGAHFSVSSLAEGSVTSVGSVNPAENFR
		LGGHGPSFPLKGITEQQK
		LGGHGPSFPLKGITEQQKEGLEIVK
		ASFEEASNQLINHIEQFLDTNETPYFMKSIDCIR
		EDIQKETVYCLNDDDETEVLKEDIIQGFR
		LKTEQGGAHFSVSSLAEGSVTSVGSVNPAENFR
		IAAYKSILQER
		FNNFLKALQEK
		FSKSQLDIIIHSLKK
		KDEKTDTLEDLFPTTKIPNPR
X-ray repair cross-complementing protein 6	XRCC6	TEGDEEAEEEQEENLEASGDYKYSGR
		FDDPGLMLMGFKPLVLLKK
		NIYVLQELDNPGAKR
		SGWESYYKTEGDEEAEEEQEENLEASGDYK
		TFNTSTGGLLLPSDTKR
		VHFEESSKLEDLLR
		NIPPYFVALVPQEEELDDQKIQVTPPGFQLVFLPFADDKR
		FDDPGLMLMGFKPLVLLK
		QIILEKEETEELKR
		SGWESYYKTEGDEEAEEEQEENLEASGDYKYSGR
		IQVTPPGFQLVFLPFADDKR
		NLEALALDLMEPEQAVDLTLPKVEAMNKR
Tyrosine--tRNA ligase, cytoplasmic	YARS	QTNFMTKLGSISCK
		GTDYQLSKEYTLDVYR
		GDAPSPEEKLHLITR
		TVVSGLVQFVPKEELQDR
		ISEECIAQWKQTNFMTK
Nuclease-sensitive element-binding protein 1	YBX1	GAEAANVTGPGGVPVQGSKYAADR
		SSEAETQQPPAAPPAAPALSAADTKPGTTGSGAGSGGPGGLTSAAPAGGDKK
		SVGDGETVEFDVVEGEKGAEAANVTGPGGVPVQGSK
		NDTKEDVFVHQTAIKK
		NYQQNYQNSESGEKNEGSESAPEGQAQQR
		SVGDGETVEFDVVEGEKGAEAANVTGPGGVPVQGSKYAADR
Tyrosine-protein kinase ZAP-70	ZAP70	ACYYSLASKVEGPPGSTQK
		AEAEEHLKLAGMADGLFLLR
		QTWKLEGEALEQAIISQAPQVEK
		KPCNRPSGLEPQPGVFDCLR
		EEIPVSNVAELLHQVSMGMKYLEEK
		LEGEALEQAIISQAPQVEKLIATTAHER
		QLNGTYAIAGGKAHCGPAELCEFYSR
		LYSGAQTDGKFLLRPR
		KEQGTYALSLIYGKTVYHYLISQDK
Zinc finger CCCH-type antiviral protein 1	ZC3HAV1	ADPEVCCFITKILCAHGGR
		KNSNVDSSYLESLYQSCPR
		NYELSFQGMIQTNIASKTQK
		FLENGSQEDLLHGNPGSTYLASNSTSAPNWKSLTSWTNDQGAR
		NLCKYSHEVLSEENFK
AN1-type zinc finger protein 2B	ZFAND2B	ALEMSLAETKPQVPSCQEEEDLALAQALSASEAEYQR
		CDACSGIFCADHVAYAQHHCGSAYQKDIQVPVCPLCNVPVPVAR
E3 SUMO-protein ligase ZNF451	ZNF451	EKIDFQHAHGLQELEFIR
		TETSIKTEDDFPVIETSNQLTCGCR
		YFYEMDEVEGETLPSSSTTLDNLTANKPSSAITVIDHSPANSSPR
E3 ubiquitin-protein ligase ZNRF1	ZNRF1	CPICSKSVASDEMEMHFIMCLSKPR

## Sheet: KEGG_Human
Term	Overlap	P-value	Adjusted P-value	Old P-value	Old Adjusted P-value	Odds Ratio	Combined Score	Genes
Pathogenic Escherichia coli infection	13/55	3.67545e-11	1.13204e-08	0	0	12.0287	289.01	ITGB1;ARPC1B;TUBB;TUBB4B;ACTB;ACTG1;TUBA1C;TUBA1B;TUBB2B;TUBA1A;TUBB3;NCL;ARHGEF2
Spliceosome	15/134	6.29464e-08	9.69374e-06	0	0	5.69671	94.457	SF3B5;DDX5;HNRNPA3;EIF4A3;HNRNPU;U2AF1;PRPF8;HNRNPM;HNRNPK;PCBP1;TRA2B;SNRPD3;HNRNPC;SRSF6;HNRNPA1
RNA transport	16/165	1.72788e-07	1.77396e-05	0	0	4.93484	76.8414	EIF4A2;EIF4A1;SEH1L;PABPC4;EIF4A3;SUMO4;EIF2S2;EEF1A1;FXR1;XPO1;EIF3I;PABPC1;EIF3F;KPNB1;EIF4G2;EIF3A
DNA replication	8/36	3.8703e-07	2.3841e-05	0	0	11.309	166.975	POLD3;FEN1;MCM7;LIG1;RFC2;MCM4;MCM6;MCM2
Phagosome	15/152	3.34257e-07	2.57378e-05	0	0	5.0221	74.8863	ATP6V1A;ITGB1;DYNC1H1;TUBB;STX7;TUBB4B;CORO1A;ACTB;ACTG1;TUBA1C;TUBA1B;TUBB2B;TUBA1A;TUBB3;RAB7A
Gap junction	10/88	8.8378e-06	0.000453674	0	0	5.78302	67.294	TUBA1C;TUBA1B;TUBB2B;TUBA1A;MAP2K2;TUBB3;TUBB;GNAQ;CDK1;TUBB4B
Proteasome	7/45	2.55606e-05	0.00112467	0	0	7.91631	83.7107	PSMA5;PSMB2;PSMC4;PSMD2;PSMC1;PSMD3;ADRM1
T cell receptor signaling pathway	10/101	3.0006e-05	0.00115523	0	0	5.03867	52.4733	ZAP70;MAP2K2;LCK;PTPN6;PLCG1;CD247;CD3E;MAPK14;PAK2;VAV1
Cell cycle	11/124	3.40534e-05	0.00116538	0	0	4.51449	46.4432	RB1;CDK6;MCM7;PRKDC;PLK1;CDK1;MCM4;MCM6;BUB3;SMC1A;MCM2
Th17 cell differentiation	10/107	4.94465e-05	0.00126913	0	0	4.75613	47.1552	ZAP70;HSP90AA1;HSP90AB1;IFNGR1;LCK;STAT1;PLCG1;CD247;CD3E;MAPK14
Salmonella infection	9/86	4.82678e-05	0.0013515	0	0	5.32576	52.9314	DYNC1H1;IFNGR1;ARPC1B;MYH9;FLNA;MAPK14;ACTB;ACTG1;RAB7A
Epstein-Barr virus infection	14/201	4.63915e-05	0.00142886	0	0	3.54462	35.3696	RB1;USP7;STAT1;ADRM1;ISG15;CD3E;MAPK14;CDK6;PSMC4;PSMD2;PSMC1;PSMD3;VIM;CD247
Non-homologous end-joining	4/13	9.12142e-05	0.00216108	0	0	15.6586	145.661	FEN1;XRCC6;XRCC5;PRKDC
Bacterial invasion of epithelial cells	8/74	0.000100609	0.0022134	0	0	5.50168	50.639	ITGB1;SEPT9;SEPT6;ARPC1B;ELMO1;SEPT1;ACTB;ACTG1
HIF-1 signaling pathway	9/100	0.000156912	0.00284288	0	0	4.58015	40.1213	LDHA;MAP2K2;PFKFB3;IFNGR1;PGK1;SLC2A1;ELOB;ENO1;PLCG1
Influenza A	12/171	0.000149198	0.00287206	0	0	3.57127	31.4637	FDPS;MAP2K2;XPO1;HNRNPUL1;PABPN1;IFNGR1;STAT1;KPNA2;MAPK14;ACTB;PML;ACTG1
Tight junction	12/170	0.000141179	0.00289888	0	0	3.59228	31.8473	ITGB1;TUBA1C;ACTR2;MYL6;TUBA1B;TUBA1A;MAP3K1;PPP2R1B;MYH9;ARHGEF2;ACTB;ACTG1
Vasopressin-regulated water reabsorption	6/44	0.000208037	0.00355975	0	0	6.93963	58.8327	NSF;DYNC1H1;DCTN1;ARHGDIB;DYNLL1;RAB11B
Ribosome	11/153	0.00022643	0.00367054	0	0	3.6588	30.7086	RPS17;RPL3;RPS8;RPS5;RPL22;RPLP0;RPS3;RPL24;RPSA;RPS24;RPS12
Human immunodeficiency virus 1 infection	13/212	0.000304367	0.00426114	0	0	3.12065	25.2688	MAP2K2;CD3E;MAPK14;GNG2;GNAQ;CFL1;GNB1;CDK1;ELOB;PLCG1;CD247;CALM1;PAK2
Shigellosis	7/65	0.000280047	0.00431273	0	0	5.48052	44.8337	ITGB1;ARPC1B;ELMO1;U2AF1;MAPK14;ACTB;ACTG1
Nucleotide excision repair	6/47	0.000301154	0.00441693	0	0	6.49667	52.6743	POLD3;LIG1;RFC2;XPC;RAD23A;RAD23B
Necroptosis	11/162	0.000370737	0.00496466	0	0	3.45553	27.2988	HIST2H2AA3;HSP90AA1;HSP90AB1;H2AFY;IFNGR1;STAT1;FAF1;GLUL;PPIA;PPID;HIST2H2AC
mRNA surveillance pathway	8/91	0.000424866	0.00545245	0	0	4.4739	34.7342	NUDT21;PPP2R1B;PABPN1;PABPC4;EIF4A3;CSTF2T;PABPC1;PPP1CA
Th1 and Th2 cell differentiation	8/92	0.000457498	0.00563637	0	0	4.42527	34.0292	ZAP70;IFNGR1;LCK;STAT1;PLCG1;CD247;CD3E;MAPK14
Natural killer cell mediated cytotoxicity	9/131	0.00114643	0.0135808	0	0	3.4963	23.6738	ZAP70;MAP2K2;IFNGR1;LCK;SH2D1A;PTPN6;PLCG1;CD247;VAV1
Fluid shear stress and atherosclerosis	9/139	0.00173346	0.0197743	0	0	3.29507	20.9489	HSP90AA1;HSP90AB1;GSTP1;SUMO4;ARHGEF2;CALM1;MAPK14;ACTB;ACTG1
AMPK signaling pathway	8/120	0.00257206	0.0282927	0	0	3.39271	20.2309	RAB2A;PFKFB3;PPP2R1B;RAB14;HMGCR;EEF2;ELAVL1;RAB11B
Regulation of actin cytoskeleton	11/214	0.00350808	0.0372582	0	0	2.61587	14.7867	ITGB1;MAP2K2;ARPC1B;CFL1;MYH9;PIP5K1C;PAK2;ACTB;VAV1;PPP1CA;ACTG1
Kaposi sarcoma-associated herpesvirus infection	10/186	0.00384644	0.0394901	0	0	2.73605	15.2141	RB1;MAP2K2;CDK6;GNG2;IFNGR1;STAT1;GNB1;PLCG1;CALM1;MAPK14
Chagas disease (American trypanosomiasis)	7/103	0.00422703	0.0419975	0	0	3.45858	18.9055	GNA15;PPP2R1B;IFNGR1;GNAQ;CD247;CD3E;MAPK14
Dopaminergic synapse	8/131	0.00440031	0.0423529	0	0	3.10782	16.8633	GNG2;PPP2R1B;GNAQ;GNB1;COMT;CALM1;MAPK14;PPP1CA
One carbon pool by folate	3/20	0.00669556	0.0572842	0	0	7.63359	38.2161	ATIC;MTHFD1;GART
Viral carcinogenesis	10/201	0.00658586	0.0579556	0	0	2.53187	12.7172	RB1;RANBP1;USP7;HNRNPK;CDK6;DDX3X;PSMC1;RASA2;CDK1;SND1
Proteoglycans in cancer	10/201	0.00658586	0.0596602	0	0	2.53187	12.7172	ITGB1;DDX5;MAP2K2;FLNA;PTPN6;PLCG1;MAPK14;ACTB;PPP1CA;ACTG1
Hypertrophic cardiomyopathy (HCM)	6/85	0.00658193	0.0614314	0	0	3.59228	18.0455	ITGB1;ACTC1;TPM4;ATP2A2;ACTB;ACTG1
Apoptosis	8/143	0.00739056	0.0615214	0	0	2.84703	13.9719	TUBA1C;TUBA1B;MAP2K2;TUBA1A;ACTB;LMNB2;ACTG1;LMNB1
Thyroid hormone signaling pathway	7/116	0.0080217	0.0633509	0	0	3.07098	14.8194	MAP2K2;STAT1;SLC2A1;ATP2A2;PLCG1;ACTB;ACTG1
Adrenergic signaling in cardiomyocytes	8/145	0.00800958	0.0649197	0	0	2.80776	13.5534	ACTC1;PPP2R1B;TPM4;GNAQ;ATP2A2;CALM1;MAPK14;PPP1CA
Fc gamma R-mediated phagocytosis	6/91	0.00910029	0.0683632	0	0	3.35542	15.7686	ARPC1B;CFL1;PLCG1;PIP5K1C;DOCK2;VAV1
Alcoholism	9/180	0.00941036	0.0690093	0	0	2.54453	11.8726	HIST2H2AA3;GNG2;H2AFY;H3F3A;GNB1;CALM1;SLC29A1;HIST2H2AC;PPP1CA
Dilated cardiomyopathy (DCM)	6/91	0.00910029	0.0700723	0	0	3.35542	15.7686	ITGB1;ACTC1;TPM4;ATP2A2;ACTB;ACTG1
Mismatch repair	3/23	0.00995965	0.0713389	0	0	6.6379	30.5955	POLD3;LIG1;RFC2
Oxytocin signaling pathway	8/153	0.0108809	0.0761664	0	0	2.66095	12.0295	MYL6;MAP2K2;GNAQ;EEF2;CALM1;ACTB;ACTG1;PPP1CA
Platelet activation	7/124	0.0113496	0.0776816	0	0	2.87286	12.8663	ITGB1;GNAQ;MAPK14;ACTB;ACTG1;FERMT3;PPP1CA
Human T-cell leukemia virus 1 infection	10/219	0.011645	0.0779708	0	0	2.32377	10.3475	RB1;RANBP1;FDPS;XPO1;MAP3K1;MAP2K2;LCK;SLC2A1;BUB3;CD3E
RIG-I-like receptor signaling pathway	5/70	0.0121753	0.0797871	0	0	3.63504	16.0245	DDX3X;MAP3K1;ISG15;MAPK14;TANK
B cell receptor signaling pathway	5/71	0.0128925	0.082727	0	0	3.58384	15.5937	IFITM1;MAP2K2;CD81;PTPN6;VAV1
Inflammatory mediator regulation of TRP channels	6/100	0.0140688	0.0833305	0	0	3.05344	13.0192	PRKCH;GNAQ;PLCG1;CALM1;MAPK14;PPP1CA
Cellular senescence	8/160	0.0139634	0.0843279	0	0	2.54453	10.8685	RB1;MAP2K2;CDK6;CDK1;CALM1;MAPK14;PPID;PPP1CA
Cysteine and methionine metabolism	4/47	0.0134693	0.0846639	0	0	4.33111	18.6556	DNMT1;LDHA;AHCYL1;MAT2A
Purine metabolism	7/129	0.0138798	0.0854994	0	0	2.7615	11.8118	ATIC;GMPS;NTPCR;DCK;GART;ITPA;PAPSS1
Leishmaniasis	5/74	0.0152141	0.0884141	0	0	3.43855	14.3922	ITGB1;IFNGR1;STAT1;PTPN6;MAPK14
Glioma	5/75	0.0160461	0.0915221	0	0	3.39271	14.0196	RB1;MAP2K2;CDK6;PLCG1;CALM1
Vibrio cholerae infection	4/50	0.0166149	0.0930436	0	0	4.07125	16.6817	ATP6V1A;PLCG1;ACTB;ACTG1
Pathways in cancer	18/530	0.0178928	0.0984107	0	0	1.72836	6.9538	RB1;ITGB1;HSP90AA1;MAP2K2;HSP90AB1;IFNGR1;STAT1;GSTP1;SLC2A1;PML;CDK6;GNG2;TRAF4;GNAQ;GNB1;ELOB;PLCG1;CALM1
RNA degradation	5/79	0.0196755	0.106317	0	0	3.22092	12.653	DIS3;PABPC4;ENO1;PABPC1;PATL1
Leukocyte transendothelial migration	6/112	0.0232735	0.12359	0	0	2.72628	10.252	ITGB1;PLCG1;MAPK14;ACTB;VAV1;ACTG1
Pyrimidine metabolism	4/57	0.0256283	0.133788	0	0	3.57127	13.0853	CAD;CTPS1;UMPS;DCK
Base excision repair	3/33	0.0265749	0.136418	0	0	4.62642	16.7837	POLD3;FEN1;LIG1
Neurotrophin signaling pathway	6/119	0.0301735	0.152351	0	0	2.56591	8.98273	MAP2K2;MAP3K1;ARHGDIB;PLCG1;CALM1;MAPK14
GABAergic synapse	5/89	0.0309827	0.153914	0	0	2.85902	9.93317	NSF;GNG2;GNB1;GLUL;SLC38A2
IL-17 signaling pathway	5/93	0.0364467	0.172702	0	0	2.73605	9.06154	HSP90AA1;HSP90AB1;TRAF4;MAPK14;ELAVL1
Oocyte meiosis	6/125	0.0370565	0.17293	0	0	2.44275	8.04962	PPP2R1B;PLK1;CDK1;CALM1;SMC1A;PPP1CA
Primary immunodeficiency	3/37	0.0357466	0.174761	0	0	4.12626	13.7458	ZAP70;LCK;CD3E
GnRH signaling pathway	5/93	0.0364467	0.1754	0	0	2.73605	9.06154	MAP2K2;MAP3K1;GNAQ;MAPK14;CALM1
Mitophagy	4/65	0.0389363	0.178991	0	0	3.13173	10.1651	CSNK2B;NBR1;TAX1BP1;RAB7A
Protein processing in endoplasmic reticulum	7/165	0.0448067	0.184006	0	0	2.15899	6.70454	ATXN3;NSFL1C;HSP90AA1;HSPH1;HSP90AB1;RAD23A;RAD23B
Renal cell carcinoma	4/69	0.0468216	0.184885	0	0	2.95018	9.03171	MAP2K2;SLC2A1;ELOB;PAK2
Non-small cell lung cancer	4/66	0.0408304	0.184938	0	0	3.08428	9.86453	RB1;MAP2K2;CDK6;PLCG1
Vascular smooth muscle contraction	6/132	0.0462659	0.185064	0	0	2.31321	7.1093	MYL6;PRKCH;MAP2K2;GNAQ;CALM1;PPP1CA
Progesterone-mediated oocyte maturation	5/99	0.0456902	0.185165	0	0	2.57023	7.93141	HSP90AA1;HSP90AB1;PLK1;CDK1;MAPK14
Ferroptosis	3/40	0.0435567	0.186326	0	0	3.81679	11.9607	PCBP1;PCBP2;ACSL3
Glycolysis / Gluconeogenesis	4/68	0.0447731	0.186353	0	0	2.99356	9.29845	LDHA;PGK1;ENO1;ADH5
Long-term potentiation	4/67	0.0427761	0.188215	0	0	3.03824	9.57587	MAP2K2;GNAQ;CALM1;PPP1CA
Focal adhesion	8/199	0.0434346	0.18842	0	0	2.04585	6.41682	ITGB1;FLNA;PIP5K1C;PAK2;ACTB;VAV1;PPP1CA;ACTG1
Fc epsilon RI signaling pathway	4/68	0.0447731	0.188906	0	0	2.99356	9.29845	MAP2K2;PLCG1;MAPK14;VAV1
Hepatocellular carcinoma	7/168	0.0485328	0.189217	0	0	2.12044	6.41543	RB1;MAP2K2;CDK6;GSTP1;PLCG1;ACTB;ACTG1
Prostate cancer	5/97	0.042468	0.189567	0	0	2.62323	8.28678	RB1;HSP90AA1;MAP2K2;HSP90AB1;GSTP1
Rap1 signaling pathway	8/206	0.0513049	0.197524	0	0	1.97633	5.86965	ITGB1;MAP2K2;GNAQ;PLCG1;CALM1;MAPK14;ACTB;ACTG1
Estrogen signaling pathway	6/137	0.0536419	0.199057	0	0	2.22878	6.52014	HSP90AA1;MAP2K2;HSP90AB1;GNAQ;FKBP4;CALM1
Arrhythmogenic right ventricular cardiomyopathy (ARVC)	4/72	0.0532744	0.200104	0	0	2.82725	8.29036	ITGB1;ATP2A2;ACTB;ACTG1
Adherens junction	4/72	0.0532744	0.202574	0	0	2.82725	8.29036	CSNK2B;PTPN6;ACTB;ACTG1
Pertussis	4/76	0.0625893	0.224157	0	0	2.67845	7.42242	ITGB1;CFL1;MAPK14;CALM1
NOD-like receptor signaling pathway	7/178	0.0623462	0.225913	0	0	2.00132	5.55375	HSP90AA1;HSP90AB1;IFI16;STAT1;SUGT1;MAPK14;TANK
Drug metabolism	5/108	0.06195	0.22715	0	0	2.35605	6.55317	GSTP1;GMPS;UMPS;ADH5;ITPA
Terpenoid backbone biosynthesis	2/22	0.0687189	0.243281	0	0	4.62642	12.3883	FDPS;HMGCR
Glutamatergic synapse	5/114	0.0743864	0.260352	0	0	2.23204	5.79992	GNG2;GNAQ;GNB1;GLUL;SLC38A2
Human cytomegalovirus infection	8/225	0.0770811	0.266753	0	0	1.80944	4.63742	RB1;MAP2K2;CDK6;GNG2;GNAQ;GNB1;CALM1;MAPK14
Peroxisome	4/83	0.080799	0.276512	0	0	2.45256	6.17012	ABCD3;PRDX1;IDH2;ACSL3
Hepatitis C	6/155	0.0857895	0.290364	0	0	1.96996	4.83794	RB1;MAP2K2;CDK6;PPP2R1B;CD81;STAT1
Ras signaling pathway	8/232	0.0882336	0.295391	0	0	1.75485	4.26036	ZAP70;MAP2K2;GNG2;GNB1;RASA2;PLCG1;CALM1;PAK2
Glutathione metabolism	3/56	0.0975903	0.323202	0	0	2.72628	6.34399	GSTP1;IDH2;LAP3
Hepatitis B	6/163	0.102856	0.337017	0	0	1.87327	4.26062	RB1;MAP2K2;DDX3X;MAP3K1;STAT1;MAPK14
Phototransduction	2/28	0.104245	0.337972	0	0	3.63504	8.21888	GNB1;CALM1
Small cell lung cancer	4/93	0.110789	0.344676	0	0	2.18884	4.81574	RB1;ITGB1;CDK6;TRAF4
Viral myocarditis	3/59	0.109775	0.345009	0	0	2.58766	5.71696	ACTB;EIF4G2;ACTG1
Long-term depression	3/60	0.113962	0.347527	0	0	2.54453	5.52644	MAP2K2;PPP2R1B;GNAQ
VEGF signaling pathway	3/59	0.109775	0.348565	0	0	2.58766	5.71696	MAP2K2;PLCG1;MAPK14
Relaxin signaling pathway	5/130	0.113575	0.34981	0	0	1.95733	4.25777	GNA15;MAP2K2;GNG2;GNB1;MAPK14
NF-kappa B signaling pathway	4/95	0.117309	0.350788	0	0	2.14276	4.59182	ZAP70;LCK;CSNK2B;PLCG1
cGMP-PKG signaling pathway	6/166	0.109682	0.351896	0	0	1.83942	4.06543	MAP2K2;GNAQ;ATP2A3;ATP2A2;CALM1;PPP1CA
Citrate cycle (TCA cycle)	2/30	0.116994	0.353275	0	0	3.39271	7.27951	IDH2;DLST
Circadian entrainment	4/97	0.123993	0.356913	0	0	2.09858	4.38086	GNG2;GNAQ;GNB1;CALM1
Systemic lupus erythematosus	5/133	0.121846	0.357415	0	0	1.91318	4.02724	HIST2H2AA3;H2AFY;H3F3A;SNRPD3;HIST2H2AC
RNA polymerase	2/31	0.123508	0.358874	0	0	3.28326	6.86677	POLR2B;POLR2H
Alzheimer disease	6/171	0.12156	0.360004	0	0	1.78563	3.76295	NDUFA8;GNAQ;ATP2A3;ATP2A2;CALM1;HSD17B10
Phosphatidylinositol signaling system	4/99	0.130834	0.37312	0	0	2.05619	4.18192	PLCG1;PIP5K1C;CALM1;PIK3C2B
Ubiquitin mediated proteolysis	5/137	0.133298	0.373233	0	0	1.85732	3.74282	MAP3K1;UBE2N;UBA1;ELOB;PML
Measles	5/138	0.136234	0.374643	0	0	1.84386	3.67552	CDK6;STAT1;CSNK2B;RACK1;CD3E
Ribosome biogenesis in eukaryotes	4/101	0.137828	0.375674	0	0	2.01547	3.99415	FBL;XPO1;CSNK2B;UTP18
Apelin signaling pathway	5/137	0.133298	0.376657	0	0	1.85732	3.74282	MAP2K2;GNG2;GNAQ;GNB1;CALM1
Central carbon metabolism in cancer	3/65	0.135756	0.376693	0	0	2.3488	4.6903	LDHA;MAP2K2;SLC2A1
Tuberculosis	6/179	0.141817	0.383153	0	0	1.70583	3.33186	IFNGR1;STAT1;CALM1;MAPK14;CORO1A;RAB7A
SNARE interactions in vesicular transport	2/34	0.143542	0.384442	0	0	2.99356	5.8109	STX7;VTI1B
Glucagon signaling pathway	4/103	0.14497	0.384919	0	0	1.97633	3.81676	LDHA;GNAQ;SLC2A1;CALM1
Alanine, aspartate and glutamate metabolism	2/35	0.150363	0.392474	0	0	2.90803	5.50985	CAD;GLUL
Epithelial cell signaling in Helicobacter pylori infection	3/68	0.149465	0.393465	0	0	2.24517	4.26738	ATP6V1A;PLCG1;MAPK14
Tyrosine metabolism	2/36	0.157248	0.406996	0	0	2.82725	5.23022	COMT;ADH5
Prolactin signaling pathway	3/70	0.158842	0.407694	0	0	2.18103	4.01275	MAP2K2;STAT1;MAPK14
Sulfur metabolism	1/9	0.163598	0.416432	0	0	5.65451	10.2366	PAPSS1
Melanoma	3/72	0.168393	0.418267	0	0	2.12044	3.77747	RB1;MAP2K2;CDK6
Retrograde endocannabinoid signaling	5/148	0.167104	0.418438	0	0	1.71928	3.07603	NDUFA8;GNG2;GNAQ;GNB1;MAPK14
Calcium signaling pathway	6/188	0.166327	0.419907	0	0	1.62417	2.91343	GNA15;GNAQ;ATP2A3;ATP2A2;PLCG1;CALM1
Chemokine signaling pathway	6/190	0.172004	0.423818	0	0	1.60707	2.82883	GNG2;STAT1;GNB1;ELMO1;DOCK2;VAV1
Pancreatic cancer	3/75	0.18302	0.433616	0	0	2.03562	3.45682	RB1;CDK6;STAT1
Inositol phosphate metabolism	3/74	0.178106	0.435371	0	0	2.06313	3.55968	PLCG1;PIP5K1C;PIK3C2B
Synthesis and degradation of ketone bodies	1/10	0.180041	0.436635	0	0	5.08906	8.72555	BDH2
Gastric acid secretion	3/75	0.18302	0.436977	0	0	2.03562	3.45682	GNAQ;CALM1;ACTB
Toxoplasmosis	4/113	0.182684	0.439584	0	0	1.80144	3.06244	ITGB1;IFNGR1;STAT1;MAPK14
Chronic myeloid leukemia	3/76	0.187969	0.441942	0	0	2.00884	3.35773	RB1;MAP2K2;CDK6
Bladder cancer	2/41	0.192447	0.449044	0	0	2.48247	4.09094	RB1;MAP2K2
Cardiac muscle contraction	3/78	0.197969	0.458454	0	0	1.95733	3.17018	ACTC1;TPM4;ATP2A2
Human papillomavirus infection	9/330	0.20327	0.467219	0	0	1.38793	2.21127	RB1;ATP6V1A;ITGB1;MAP2K2;CDK6;PPP2R1B;STAT1;PSMC1;ISG15
Sphingolipid signaling pathway	4/119	0.206708	0.471599	0	0	1.71061	2.69669	MAP2K2;PPP2R1B;GNAQ;MAPK14
Fatty acid degradation	2/44	0.214024	0.484701	0	0	2.31321	3.5662	ACSL3;ADH5
Fatty acid biosynthesis	1/13	0.227459	0.511369	0	0	3.91466	5.79676	ACSL3
ErbB signaling pathway	3/85	0.233873	0.521978	0	0	1.79614	2.60975	MAP2K2;PLCG1;PAK2
MicroRNAs in cancer	8/299	0.236356	0.523723	0	0	1.36162	1.96403	DNMT1;HNRNPK;MAP2K2;CDK6;DDIT4;IGF2BP1;PLCG1;VIM
Osteoclast differentiation	4/127	0.240029	0.528064	0	0	1.60285	2.28726	IFNGR1;LCK;STAT1;MAPK14
Malaria	2/49	0.250402	0.546978	0	0	2.07717	2.87623	GYPC;CD81
Thiamine metabolism	1/15	0.257542	0.558612	0	0	3.39271	4.60245	NTPCR
PI3K-Akt signaling pathway	9/354	0.262602	0.561677	0	0	1.29383	1.73	ITGB1;HSP90AA1;MAP2K2;CDK6;HSP90AB1;GNG2;PPP2R1B;DDIT4;GNB1
FoxO signaling pathway	4/132	0.26145	0.563124	0	0	1.54214	2.0688	USP7;MAP2K2;PLK1;MAPK14
Fanconi anemia pathway	2/54	0.286937	0.601202	0	0	1.88484	2.3532	FANCI;FANCD2
Selenocompound metabolism	1/17	0.286456	0.604305	0	0	2.99356	3.74246	PAPSS1
Amoebiasis	3/96	0.292206	0.608104	0	0	1.59033	1.95658	GNA15;GNAQ;RAB7A
Legionellosis	2/55	0.294231	0.608209	0	0	1.85057	2.26397	EEF1A1;EEF1G
Nitrogen metabolism	1/17	0.286456	0.608472	0	0	2.99356	3.74246	GLUL
Pancreatic secretion	3/98	0.302948	0.617934	0	0	1.55788	1.8604	GNAQ;ATP2A3;ATP2A2
Thermogenesis	6/231	0.30249	0.621112	0	0	1.32183	1.58053	NDUFA8;COX11;ACSL3;MAPK14;ACTB;ACTG1
Choline metabolism in cancer	3/99	0.308327	0.624768	0	0	1.54214	1.81447	MAP2K2;PLCG1;PIP5K1C
Steroid biosynthesis	1/19	0.314247	0.628494	0	0	2.67845	3.10051	LSS
AGE-RAGE signaling pathway in diabetic complications	3/100	0.313709	0.631518	0	0	1.52672	1.76991	STAT1;PLCG1;MAPK14
Melanogenesis	3/101	0.319093	0.634068	0	0	1.5116	1.72666	MAP2K2;GNAQ;CALM1
Huntington disease	5/193	0.330061	0.651659	0	0	1.31841	1.46143	NDUFA8;DCTN1;POLR2B;GNAQ;POLR2H
Toll-like receptor signaling pathway	3/104	0.335248	0.65352	0	0	1.468	1.60435	MAP2K2;STAT1;MAPK14
C-type lectin receptor signaling pathway	3/104	0.335248	0.657683	0	0	1.468	1.60435	STAT1;CALM1;MAPK14
Arginine biosynthesis	1/21	0.340958	0.660472	0	0	2.42336	2.60753	GLUL
Endocytosis	6/244	0.347438	0.668819	0	0	1.25141	1.32295	ARPC1B;PIP5K1C;EPS15;PML;RAB7A;RAB11B
mTOR signaling pathway	4/152	0.349743	0.669074	0	0	1.33923	1.40693	ATP6V1A;MAP2K2;SEH1L;DDIT4
Cushing syndrome	4/155	0.363133	0.6904	0	0	1.31331	1.33036	RB1;MAP2K2;CDK6;GNAQ
Inflammatory bowel disease (IBD)	2/65	0.366221	0.692	0	0	1.56586	1.57294	IFNGR1;STAT1
Aminoacyl-tRNA biosynthesis	2/66	0.373282	0.696792	0	0	1.54214	1.51966	YARS;QARS
Acute myeloid leukemia	2/66	0.373282	0.701041	0	0	1.54214	1.51966	MAP2K2;PML
Retinol metabolism	2/67	0.38031	0.701411	0	0	1.51912	1.46864	RDH11;ADH5
Cholinergic synapse	3/112	0.378166	0.701657	0	0	1.36314	1.32555	GNG2;GNAQ;GNB1
Amphetamine addiction	2/68	0.387306	0.701707	0	0	1.49678	1.41976	CALM1;PPP1CA
Hippo signaling pathway	4/160	0.385418	0.702419	0	0	1.27226	1.21301	PPP2R1B;ACTB;ACTG1;PPP1CA
Serotonergic synapse	3/113	0.383497	0.703078	0	0	1.35108	1.2949	GNG2;GNAQ;GNB1
Renin secretion	2/69	0.394266	0.706011	0	0	1.47509	1.37291	GNAQ;CALM1
Adipocytokine signaling pathway	2/69	0.394266	0.71014	0	0	1.47509	1.37291	SLC2A1;ACSL3
cAMP signaling pathway	5/212	0.403985	0.719233	0	0	1.20025	1.08788	MAP2K2;ATP2A2;CALM1;VAV1;PPP1CA
Collecting duct acid secretion	1/27	0.415023	0.726291	0	0	1.88484	1.65756	ATP6V1A
p53 signaling pathway	2/72	0.414925	0.730268	0	0	1.41363	1.24351	CDK6;CDK1
Bile secretion	2/72	0.414925	0.734465	0	0	1.41363	1.24351	SLC2A1;HMGCR
Metabolism of xenobiotics by cytochrome P450	2/74	0.428501	0.741451	0	0	1.37542	1.16562	GSTP1;ADH5
Butanoate metabolism	1/28	0.426533	0.742216	0	0	1.81752	1.54864	BDH2
Pentose phosphate pathway	1/30	0.448881	0.763841	0	0	1.69635	1.35878	TALDO1
Glyoxylate and dicarboxylate metabolism	1/30	0.448881	0.768085	0	0	1.69635	1.35878	GLUL
Synaptic vesicle cycle	2/78	0.455142	0.770241	0	0	1.30489	1.02714	NSF;ATP6V1A
Antigen processing and presentation	2/77	0.448548	0.771803	0	0	1.32183	1.05977	HSP90AA1;HSP90AB1
Autophagy	3/128	0.461796	0.777231	0	0	1.19275	0.921555	MAP2K2;DDIT4;RAB7A
Propanoate metabolism	1/32	0.470359	0.787341	0	0	1.59033	1.19952	LDHA
Chemical carcinogenesis	2/82	0.481057	0.792329	0	0	1.24123	0.908297	GSTP1;ADH5
Axon guidance	4/181	0.477248	0.794554	0	0	1.12465	0.831928	ITGB1;CFL1;PLCG1;PAK2
Fructose and mannose metabolism	1/33	0.480783	0.796136	0	0	1.54214	1.12937	PFKFB3
Oxidative phosphorylation	3/133	0.486965	0.797793	0	0	1.14791	0.825993	ATP6V1A;NDUFA8;COX11
Prion diseases	1/35	0.501022	0.81648	0	0	1.45402	1.00488	MAP2K2
Insulin signaling pathway	3/137	0.506684	0.817061	0	0	1.11439	0.757639	MAP2K2;CALM1;PPP1CA
Insulin secretion	2/86	0.506201	0.820578	0	0	1.1835	0.805754	GNAQ;SLC2A1
Thyroid cancer	1/37	0.520473	0.830599	0	0	1.37542	0.898174	MAP2K2
MAPK signaling pathway	6/295	0.523423	0.831001	0	0	1.03506	0.670064	MAP3K1;MAP2K2;RASA2;FLNA;MAPK14;PAK2
African trypanosomiasis	1/37	0.520473	0.834925	0	0	1.37542	0.898174	GNAQ
Salivary secretion	2/90	0.53054	0.837982	0	0	1.1309	0.716833	GNAQ;CALM1
Pyruvate metabolism	1/39	0.539168	0.842963	0	0	1.30489	0.806065	LDHA
Morphine addiction	2/91	0.536496	0.843066	0	0	1.11847	0.696469	GNG2;GNB1
Glycine, serine and threonine metabolism	1/40	0.548241	0.852819	0	0	1.27226	0.764682	PHGDH
Phospholipase D signaling pathway	3/148	0.558781	0.856241	0	0	1.03157	0.600369	MAP2K2;PLCG1;PIP5K1C
Breast cancer	3/147	0.554182	0.857729	0	0	1.03858	0.613036	RB1;MAP2K2;CDK6
Homologous recombination	1/41	0.557136	0.857989	0	0	1.24123	0.726055	POLD3
Tryptophan metabolism	1/42	0.565856	0.85854	0	0	1.21168	0.68995	DLST
Porphyrin and chlorophyll metabolism	1/42	0.565856	0.86279	0	0	1.21168	0.68995	HMOX2
Aldosterone synthesis and secretion	2/98	0.576719	0.870732	0	0	1.03858	0.571637	GNAQ;CALM1
ABC transporters	1/45	0.591002	0.887944	0	0	1.1309	0.594782	ABCD3
Valine, leucine and isoleucine degradation	1/48	0.614695	0.914619	0	0	1.06022	0.515934	HSD17B10
Arginine and proline metabolism	1/49	0.622285	0.917051	0	0	1.03858	0.49266	LAP3
JAK-STAT signaling pathway	3/162	0.620069	0.918179	0	0	0.942418	0.450405	IFNGR1;STAT1;PTPN6
Endocrine and other factor-regulated calcium reabsorption	1/48	0.614695	0.919059	0	0	1.06022	0.515934	GNAQ
Insulin resistance	2/108	0.629655	0.923494	0	0	0.942418	0.435947	SLC2A1;PPP1CA
Mineral absorption	1/51	0.637019	0.92548	0	0	0.997855	0.449988	HMOX2
Amyotrophic lateral sclerosis (ALS)	1/51	0.637019	0.929867	0	0	0.997855	0.449988	MAPK14
Endometrial cancer	1/58	0.684218	0.989386	0	0	0.877424	0.332964	MAP2K2
Lysine degradation	1/59	0.690441	0.993719	0	0	0.862552	0.31951	DLST
Steroid hormone biosynthesis	1/60	0.696542	0.997837	0	0	0.848176	0.306724	COMT
Transcriptional misregulation in cancer	3/186	0.711017	1	0	0	0.820816	0.279946	DDX5;H3F3A;PML
Arachidonic acid metabolism	1/63	0.714134	1	0	0	0.807787	0.271969	PTGES3
Cytosolic DNA-sensing pathway	1/63	0.714134	1	0	0	0.807787	0.271969	POLR2H
Cortisol synthesis and secretion	1/65	0.725293	1	0	0	0.782932	0.251461	GNAQ
Signaling pathways regulating pluripotency of stem cells	2/139	0.761087	1	0	0	0.732239	0.199907	MAP2K2;MAPK14
PPAR signaling pathway	1/74	0.77037	1	0	0	0.687711	0.179413	ACSL3
Thyroid hormone synthesis	1/74	0.77037	1	0	0	0.687711	0.179413	GNAQ
Parkinson disease	2/142	0.771385	1	0	0	0.716769	0.18605	NDUFA8;UBA1
Gastric cancer	2/149	0.79392	1	0	0	0.683095	0.157639	RB1;MAP2K2
ECM-receptor interaction	1/82	0.804202	1	0	0	0.620617	0.135235	ITGB1
Colorectal cancer	1/86	0.819205	1	0	0	0.591751	0.118008	MAP2K2
Protein digestion and absorption	1/90	0.833061	1	0	0	0.565451	0.103279	SLC38A2
TGF-beta signaling pathway	1/91	0.833061	1	0	0	0.565451	0.103279	PPP2R1B
Rheumatoid arthritis	1/91	0.836356	1	0	0	0.559237	0.0999363	ATP6V1A
Glycerophospholipid metabolism	1/97	0.854808	1	0	0	0.524645	0.0823055	ETNK1
Hematopoietic cell lineage	1/97	0.854808	1	0	0	0.524645	0.0823055	CD3E
Parathyroid hormone synthesis, secretion and action	1/106	0.878668	1	0	0	0.4801	0.0621002	GNAQ
TNF signaling pathway	1/110	0.887975	1	0	0	0.462642	0.054967	MAPK14
Cell adhesion molecules (CAMs)	1/145	0.944318	1	0	0	0.35097	0.0201078	ITGB1
Non-alcoholic fatty liver disease (NAFLD)	1/149	0.948598	1	0	0	0.341548	0.0180237	NDUFA8
Wnt signaling pathway	1/158	0.957065	1	0	0	0.322092	0.0141347	CSNK2B
Herpes simplex virus 1 infection	5/492	0.966642	1	0	0	0.517181	0.0175467	IFNGR1;STAT1;SRSF6;PML;PPP1CA
Cytokine-cytokine receptor interaction	1/294	0.997198	1	0	0	0.173097	0.000485771	IFNGR1
Olfactory transduction	2/444	0.998634	1	0	0	0.229237	0.000313253	GNB1;CALM1

## Sheet: GO_Biological_Process
Term	Overlap	P-value	Adjusted P-value	Old P-value	Old Adjusted P-value	Odds Ratio	Combined Score	Genes
RNA splicing, via transesterification reactions with bulged adenosine as nucleophile (GO:0000377)	43/237	5.06617e-29	2.58527e-25	0	0	9.23331	601.572	SF3B5;DDX5;DHX9;EIF4A3;SRRT;HNRNPU;CSTF2T;HNRNPR;U2AF1;YBX1;CWC27;PRPF8;ELAVL1;SYNCRIP;PTBP1;PABPN1;POLR2B;PCBP1;TRA2B;PCBP2;RALY;SNRPD3;POLR2H;HNRNPA1;HNRNPA0;HNRNPA3;SNRPN;NONO;HNRNPL;HNRNPM;NUDT21;SFPQ;DDX39A;HNRNPK;HNRNPUL1;HNRNPH1;HNRNPF;HNRNPA2B1;HNRNPH2;HNRNPC;PABPC1;HNRNPH3;SRSF6
mRNA processing (GO:0006397)	45/284	1.02597e-27	2.61775e-24	0	0	8.06365	501.109	SF3B5;DDX5;DHX9;CELF1;EIF4A3;SRRT;HNRNPU;CSTF2T;HNRNPR;U2AF1;YBX1;CWC27;PRPF8;ELAVL1;SYNCRIP;PTBP1;PABPN1;POLR2B;PCBP1;TRA2B;PCBP2;RALY;SNRPD3;POLR2H;HNRNPA1;HNRNPA0;HNRNPA3;SNRPN;NONO;HNRNPL;HNRNPM;KIN;NUDT21;SFPQ;DDX39A;HNRNPK;HNRNPUL1;HNRNPH1;HNRNPF;HNRNPA2B1;HNRNPH2;HNRNPC;PABPC1;HNRNPH3;SRSF6
mRNA splicing, via spliceosome (GO:0000398)	43/262	3.68869e-27	6.27445e-24	0	0	8.35227	508.357	SF3B5;DDX5;DHX9;EIF4A3;SRRT;HNRNPU;CSTF2T;HNRNPR;U2AF1;YBX1;CWC27;PRPF8;ELAVL1;SYNCRIP;PTBP1;PABPN1;POLR2B;PCBP1;TRA2B;PCBP2;RALY;SNRPD3;POLR2H;HNRNPA1;HNRNPA0;HNRNPA3;SNRPN;NONO;HNRNPL;HNRNPM;NUDT21;SFPQ;DDX39A;HNRNPK;HNRNPUL1;HNRNPH1;HNRNPF;HNRNPA2B1;HNRNPH2;HNRNPC;PABPC1;HNRNPH3;SRSF6
RNA metabolic process (GO:0016070)	37/192	4.54048e-26	5.79252e-23	0	0	9.80704	572.282	EIF4A2;EIF4A1;DDX5;DDX3X;DHX9;DDX47;EIF4A3;HNRNPU;HNRNPR;SYNCRIP;PTBP1;RBM4;PABPN1;POLR2B;PCBP1;PCBP2;PPP1R8;POLR2H;HNRNPA1;HNRNPA0;DDX18;HNRNPA3;LIG1;DIS3;PABPC4;SND1;HNRNPL;HNRNPM;DDX39A;HNRNPK;HNRNPUL1;HNRNPH1;HNRNPF;HNRNPA2B1;HNRNPH2;HNRNPC;HNRNPH3
RNA processing (GO:0006396)	30/194	1.70936e-18	1.74457e-15	0	0	7.86968	321.952	DHX9;CELF1;DDX47;EIF4A3;HNRNPU;HNRNPR;U2AF1;PRPF8;CCAR2;SYNCRIP;PTBP1;RBM4;PABPN1;SNRPD3;HNRNPA0;SNRPN;PABPC4;NONO;HNRNPL;KIN;NUDT21;SFPQ;HNRNPK;HNRNPUL1;HNRNPH1;HNRNPF;HNRNPA2B1;HNRNPC;HNRNPH3;TARDBP
nucleic acid metabolic process (GO:0090304)	20/81	7.14192e-17	6.0742e-14	0	0	12.5656	467.163	FEN1;HNRNPA3;HNRNPU;HNRNPR;HNRNPL;PTBP1;HNRNPM;HNRNPK;HNRNPH1;POLR2B;PCBP1;HNRNPF;PCBP2;HNRNPA2B1;HNRNPH2;POLR2H;HNRNPC;KPNA2;HNRNPA1;HNRNPA0
gene expression (GO:0010467)	35/412	3.68824e-13	2.68873e-10	0	0	4.32323	123.767	RPL3;SEH1L;DHX9;RPLP0;EIF4A3;HNRNPU;U2AF1;SYNCRIP;RBM4;RPS17;PABPN1;POLR2B;RPS3;IGF2BP3;POLR2H;BPTF;RPS8;RPS5;PABPC4;RPL22;RPSA;ILF2;HNRNPL;EEF1A1;DDX39A;HNRNPK;FUBP3;HNRNPUL1;HNRNPH1;HNRNPF;HNRNPA2B1;RPL24;HNRNPH3;SRSF6;RPS24
neutrophil degranulation (GO:0043312)	37/480	1.45017e-12	9.25025e-10	0	0	3.92282	106.933	HSP90AB1;DDX3X;GMFG;GSTP1;FAF2;GDI2;CNN2;PSMD2;PSMD3;TOM1;CPNE1;HMOX2;CAP1;ACTR2;CCT2;DYNC1H1;HSP90AA1;XRCC6;XRCC5;TUBB;PA2G4;KCNAB2;DYNLL1;TUBB4B;EEF2;MAPK14;ILF2;UNC13D;PSMA5;EEF1A1;RAB14;CSNK2B;PTPN6;DOCK2;PPIA;KPNB1;RAB7A
viral process (GO:0016032)	25/221	1.92356e-12	9.81595e-10	0	0	5.75685	155.302	RPL3;SEH1L;RPLP0;PTBP1;RPS17;XPO1;PCBP2;RPS3;PAK2;RANBP1;RPS8;RPS5;RPL22;RPSA;LCK;ELMO1;RPL24;CD247;EIF3F;DOCK2;PPIA;RPS24;PPID;EIF3A;RAB7A
neutrophil activation involved in immune response (GO:0002283)	37/484	1.85837e-12	1.05369e-09	0	0	3.8904	105.085	HSP90AB1;DDX3X;GMFG;GSTP1;FAF2;GDI2;CNN2;PSMD2;PSMD3;TOM1;CPNE1;HMOX2;CAP1;ACTR2;CCT2;DYNC1H1;HSP90AA1;XRCC6;XRCC5;TUBB;PA2G4;KCNAB2;DYNLL1;TUBB4B;EEF2;MAPK14;ILF2;UNC13D;PSMA5;EEF1A1;RAB14;CSNK2B;PTPN6;DOCK2;PPIA;KPNB1;RAB7A
neutrophil mediated immunity (GO:0002446)	37/488	2.37495e-12	1.10176e-09	0	0	3.85851	103.277	HSP90AB1;DDX3X;GMFG;GSTP1;FAF2;GDI2;CNN2;PSMD2;PSMD3;TOM1;CPNE1;HMOX2;CAP1;ACTR2;CCT2;DYNC1H1;HSP90AA1;XRCC6;XRCC5;TUBB;PA2G4;KCNAB2;DYNLL1;TUBB4B;EEF2;MAPK14;ILF2;UNC13D;PSMA5;EEF1A1;RAB14;CSNK2B;PTPN6;DOCK2;PPIA;KPNB1;RAB7A
mRNA stabilization (GO:0048255)	11/34	2.79814e-11	1.18991e-08	0	0	16.4646	400.081	SYNCRIP;DHX9;IGF2BP1;HNRNPU;YBX1;HNRNPC;PABPC1;MAPK14;TARDBP;ELAVL1;HNRNPA0
cellular macromolecule biosynthetic process (GO:0034645)	29/368	2.50561e-10	9.83548e-08	0	0	4.0104	88.6592	FEN1;RPL3;MCM7;RPLP0;RPS17;POLR2B;RPS3;IGF2BP3;POLR2H;BPTF;RPS8;RFC2;PABPC4;RPS5;RPL22;RPSA;EEF2;ILF2;EEF1A1;EEF1G;KIN;FUBP3;CDK1;RPL24;MCM4;MCM6;RPS24;EIF4G2;MCM2
regulation of translation (GO:0006417)	22/214	2.72848e-10	9.9453e-08	0	0	5.23174	115.214	EIF4A2;CDC123;SEH1L;DDX3X;DHX9;EIF4A3;H3F3A;EEF2;ELAVL1;FXR1;SYNCRIP;RBM4;POLR2B;NCL;RACK1;RPS3;IGF2BP1;IGF2BP3;POLR2H;VIM;EIF4G2;METAP1
regulation of mitotic cell cycle phase transition (GO:1901990)	20/185	7.35675e-10	2.50277e-07	0	0	5.50168	115.702	DYNC1H1;HSP90AA1;DCTN1;TUBB;PLK1;XPC;DYNLL1;TUBB4B;PSMA5;ACTR1A;CDK6;TUBA1A;PSMB2;PSMC4;PSMD2;PSMC1;PSMD3;CDK1;PTPN6;BUB3
mRNA metabolic process (GO:0016071)	15/98	7.99347e-10	2.54942e-07	0	0	7.78938	163.166	DDX5;CELF1;DIS3;NONO;HNRNPR;U2AF1;PRPF8;PTBP1;KIN;NUDT21;SFPQ;PCBP2;HNRNPA2B1;SNRPD3;HNRNPA0
cellular response to interleukin-12 (GO:0071349)	11/47	1.35466e-09	3.84046e-07	0	0	11.9106	243.21	CNN2;HNRNPF;RPLP0;CFL1;BOLA2;TCP1;HNRNPA2B1;TALDO1;PAK2;PPIA;LMNB1
interleukin-12-mediated signaling pathway (GO:0035722)	11/47	1.35466e-09	4.06637e-07	0	0	11.9106	243.21	CNN2;HNRNPF;RPLP0;CFL1;BOLA2;TCP1;HNRNPA2B1;TALDO1;PAK2;PPIA;LMNB1
RNA splicing (GO:0008380)	15/107	2.80963e-09	7.54608e-07	0	0	7.13419	140.474	SNRPN;DDX47;NONO;EIF4A3;U2AF1;PRPF8;CCAR2;SYNCRIP;PTBP1;SFPQ;TRA2B;SNRPD3;HNRNPC;HNRNPH3;TARDBP
DNA metabolic process (GO:0006259)	25/315	3.8676e-09	9.86817e-07	0	0	4.03894	78.2367	FEN1;DNMT1;MCM7;PRKDC;XPC;POLD3;TRIM28;RPS3;KPNA2;XRCC6;USP7;LIG1;XRCC5;MGMT;RFC2;PTGES3;SMC1A;KIN;FANCD2;UBE2N;CDK1;MCM4;MCM6;RAD18;MCM2
regulation of G2/M transition of mitotic cell cycle (GO:0010389)	17/150	6.85957e-09	1.66688e-06	0	0	5.7676	108.417	DYNC1H1;HSP90AA1;DCTN1;TUBB;PLK1;DYNLL1;TUBB4B;PSMA5;ACTR1A;CDK6;TUBA1A;PSMB2;PSMC4;PSMD2;PSMC1;PSMD3;CDK1
ribonucleoprotein complex assembly (GO:0022618)	17/157	1.37273e-08	3.18412e-06	0	0	5.51045	99.7604	DYNC1H1;HSP90AA1;RPL3;DDX3X;HSP90AB1;DHX9;CELF1;RPS5;PTGES3;RPSA;PATL1;RPS17;RPL24;SNRPD3;SRSF6;LSM14A;EIF3A
regulation of mRNA stability (GO:0043488)	15/129	3.76437e-08	8.35199e-06	0	0	5.91751	101.16	DIS3;HNRNPU;ELAVL1;FXR1;PSMA5;XPO1;PSMB2;PSMC4;PSMD2;PSMC1;PSMD3;IGF2BP1;IGF2BP3;PABPC1;VIM
protein modification by small protein removal (GO:0070646)	21/262	5.87845e-08	1.2499e-05	0	0	4.07902	67.9131	USP14;USP7;USP20;USP9X;GPS1;ADRM1;NEDD8;RAD23A;TANK;RAD23B;ACTB;PSMA5;ATXN3;PSMB2;PSMC4;PSMD2;PSMC1;PSMD3;CDK1;EIF3F;COPS8
nuclear-transcribed mRNA catabolic process (GO:0000956)	17/175	6.92832e-08	1.41421e-05	0	0	4.94366	81.4965	EIF4A2;EIF4A1;DDX5;RPL3;RPS8;RPS5;EIF4A3;RPL22;RPLP0;RPSA;PATL1;RPS17;CSDE1;RPS3;RPL24;PABPC1;RPS24
regulation of cell cycle G2/M phase transition (GO:1902749)	12/85	1.01341e-07	1.98901e-05	0	0	7.18455	115.706	DYNC1H1;ACTR1A;HSP90AA1;TUBA1A;CDK6;H2AFY;DCTN1;TUBB;PLK1;CDK1;DYNLL1;TUBB4B
positive regulation of DNA biosynthetic process (GO:2000573)	10/56	1.21837e-07	2.30272e-05	0	0	9.0876	144.68	CCT3;CCT6A;CCT2;HSP90AA1;HSP90AB1;RFC2;XRCC5;PTGES3;TCP1;HNRNPA1
translation (GO:0006412)	19/233	1.93164e-07	3.52042e-05	0	0	4.14988	64.1559	YARS;RPL3;RPS8;PABPC4;RPS5;RPL22;RPLP0;RPSA;HSPA14;EEF2;EEF1A1;EEF1G;RPS17;QARS;RPS3;RPL24;IGF2BP3;ABCE1;RPS24
nucleotide-excision repair (GO:0006289)	13/109	2.27171e-07	3.99743e-05	0	0	6.06952	92.8488	USP7;LIG1;RFC2;GPS1;XPC;RAD23A;RAD23B;POLD3;ATXN3;POLR2B;UBE2N;POLR2H;COPS8
RNA secondary structure unwinding (GO:0010501)	9/47	2.80707e-07	4.77482e-05	0	0	9.74501	147.013	EIF4A2;EIF4A1;DDX18;DDX5;DDX3X;DDX39A;DHX9;DDX47;EIF4A3
DNA repair (GO:0006281)	21/289	3.07393e-07	5.06008e-05	0	0	3.69793	55.451	FANCI;FEN1;LIG1;PRKDC;XRCC5;MGMT;RFC2;XPC;WRNIP1;RAD23A;SMC1A;RAD23B;RNF168;POLD3;ATXN3;TRIM28;FANCD2;RPS3;UBE2N;CDK1;RAD18
mitotic cell cycle phase transition (GO:0044772)	18/222	4.41493e-07	7.04043e-05	0	0	4.12626	60.38	RB1;RANBP1;DYNC1H1;HSP90AA1;MCM7;DCTN1;TUBB;PLK1;DYNLL1;TUBB4B;PPP6C;ACTR1A;TUBA1A;CDK6;CDK1;MCM4;MCM6;MCM2
ncRNA processing (GO:0034470)	18/228	6.53283e-07	0.000101021	0	0	4.01768	57.2168	RPL3;RPS8;DDX47;DIS3;RPS5;RRP1;RPL22;RPLP0;SRRT;RPSA;UTP18;FBL;RPS17;HNRNPA2B1;RPS3;RPL24;INTS7;RPS24
negative regulation of gene expression (GO:0010629)	32/619	7.0609e-07	0.000105976	0	0	2.63085	37.2622	RB1;DNMT1;DDX3X;EIF4A3;ENO1;CD3E;CCAR2;FXR1;PTBP1;SYNCRIP;RBM4;IFI16;TRIM28;RACK1;RPS3;IGF2BP1;CPNE1;IGF2BP3;XRCC6;NDFIP1;MAP2K2;H2AFY;DIS3;XRCC5;NONO;H3F3A;PA2G4;PML;SFPQ;QARS;NCL;TARDBP
protein deubiquitination (GO:0016579)	19/258	9.22693e-07	0.000130792	0	0	3.74776	52.0787	USP14;USP7;USP20;USP9X;ADRM1;NEDD8;RAD23A;TANK;RAD23B;ACTB;PSMA5;ATXN3;PSMB2;PSMC4;PSMD2;PSMC1;PSMD3;CDK1;EIF3F
regulation of alternative mRNA splicing, via spliceosome (GO:0000381)	8/40	9.18326e-07	0.000133892	0	0	10.1781	141.483	HNRNPL;PTBP1;RBM4;DDX5;TRA2B;HNRNPU;HNRNPA1;SRSF6
ubiquitin-dependent protein catabolic process (GO:0006511)	22/342	1.26888e-06	0.000175003	0	0	3.27366	44.4477	RANBP1;FAF1;ADRM1;NEDD8;RNF40;PML;PSMA5;RNF168;BAG6;ATXN3;NSFL1C;ZNRF1;RNF213;PSMB2;PSMC4;PSMD2;PSMC1;PSMD3;PCBP2;CDK1;UBA1;BUB3
SRP-dependent cotranslational protein targeting to membrane (GO:0006614)	11/90	1.51944e-06	0.000198812	0	0	6.21996	83.3299	RPS17;RPL3;RPS8;RPS5;ZFAND2B;RPLP0;RPL22;RPS3;RPL24;RPSA;RPS24
negative regulation of cellular protein metabolic process (GO:0032269)	11/90	1.51944e-06	0.000204044	0	0	6.21996	83.3299	FXR1;BAG6;RBM4;SYNCRIP;DDX3X;NCL;EIF4A3;RACK1;RPS3;IGF2BP1;IGF2BP3
alternative mRNA splicing, via spliceosome (GO:0000380)	5/12	2.01896e-06	0.000257569	0	0	21.2044	278.052	HNRNPM;DDX5;SFPQ;DHX9;SRSF6
nuclear-transcribed mRNA catabolic process, nonsense-mediated decay (GO:0000184)	12/113	2.32288e-06	0.00028223	0	0	5.40431	70.1085	RPS17;RPL3;RPS8;RPS5;EIF4A3;RPL22;RPLP0;RPS3;RPL24;RPSA;PABPC1;RPS24
negative regulation of cellular amide metabolic process (GO:0034249)	10/76	2.30354e-06	0.000286707	0	0	6.69613	86.9229	FXR1;RBM4;SYNCRIP;DDX3X;NCL;EIF4A3;RACK1;RPS3;IGF2BP1;IGF2BP3
viral transcription (GO:0019083)	12/114	2.55083e-06	0.000302718	0	0	5.3569	68.9921	RPS17;RPL3;SEH1L;RPS8;DHX9;RPS5;RPL22;RPLP0;RPS3;RPL24;RPSA;RPS24
ribosome biogenesis (GO:0042254)	17/227	2.75379e-06	0.000319377	0	0	3.81119	48.7929	RPL3;RPS8;DDX47;DIS3;RPS5;RRP1;RPL22;RPLP0;RPSA;UTP18;FBL;RPS17;XPO1;RPS3;RPL24;ABCE1;RPS24
cytokine-mediated signaling pathway (GO:0019221)	31/634	3.35764e-06	0.000380757	0	0	2.48834	31.3637	ITGB1;IFITM1;RPLP0;TANK;TXNDC17;LMNB1;CNN2;PSMB2;PSMD2;PSMD3;CFL1;PAK2;HSP90AA1;IFNGR1;STAT1;TALDO1;ISG15;PML;VAV1;PSMA5;PSMC4;HNRNPF;PSMC1;TCP1;BOLA2;CSNK2B;HNRNPA2B1;UBE2N;PTPN6;VIM;PPIA
platelet aggregation (GO:0070527)	7/34	3.6493e-06	0.000404834	0	0	10.4775	131.188	FLNA;MYH9;CLIC1;ACTB;METAP1;ACTG1;FERMT3
regulation of viral genome replication (GO:0045069)	9/64	4.22637e-06	0.000458876	0	0	7.15649	88.5556	IFITM1;DDX3X;IFI16;RAD23A;ISG15;PABPC1;ZC3HAV1;PPIA;PPID
positive regulation of telomere maintenance via telomere lengthening (GO:1904358)	7/35	4.48507e-06	0.000476819	0	0	10.1781	125.341	CCT3;CCT6A;CCT2;XRCC5;TCP1;HNRNPA2B1;HNRNPA1
positive regulation of telomerase activity (GO:0051973)	7/36	5.47427e-06	0.000570106	0	0	9.89539	119.887	CCT2;HSP90AA1;HSP90AB1;XRCC5;PTGES3;TCP1;HNRNPA2B1
regulation of telomere maintenance via telomerase (GO:0032210)	8/52	7.31528e-06	0.000746597	0	0	7.82932	92.586	CCT3;CCT6A;CCT2;XRCC5;TCP1;HNRNPU;HNRNPC;HNRNPA1
negative regulation of translation (GO:0017148)	10/89	9.7847e-06	0.000924655	0	0	5.71804	65.9559	FXR1;RBM4;SYNCRIP;DDX3X;NCL;EIF4A3;RACK1;RPS3;IGF2BP1;IGF2BP3
regulation of protein localization to Cajal body (GO:1904869)	4/8	9.65556e-06	0.000929666	0	0	25.4453	293.842	CCT3;CCT6A;CCT2;TCP1
positive regulation of protein localization to Cajal body (GO:1904871)	4/8	9.65556e-06	0.000947544	0	0	25.4453	293.842	CCT3;CCT6A;CCT2;TCP1
homotypic cell-cell adhesion (GO:0034109)	7/39	9.58759e-06	0.000959323	0	0	9.13421	105.546	FLNA;MYH9;CLIC1;ACTB;METAP1;ACTG1;FERMT3
rRNA metabolic process (GO:0016072)	15/201	1.10528e-05	0.0010255	0	0	3.7978	43.3437	RPL3;RPS8;DDX47;DIS3;RPS5;RRP1;RPL22;RPLP0;RPSA;UTP18;FBL;RPS17;RPS3;RPL24;RPS24
viral gene expression (GO:0019080)	11/111	1.19621e-05	0.00109005	0	0	5.04321	57.1586	RPS17;RPL3;SEH1L;RPS8;RPS5;RPL22;RPLP0;RPS3;RPL24;RPSA;RPS24
rRNA processing (GO:0006364)	15/203	1.24423e-05	0.00111391	0	0	3.76039	42.4714	RPL3;RPS8;DDX47;DIS3;RPS5;RRP1;RPL22;RPLP0;RPSA;UTP18;FBL;RPS17;RPS3;RPL24;RPS24
regulation of ubiquitin-protein ligase activity involved in mitotic cell cycle (GO:0051439)	9/73	1.27519e-05	0.00112195	0	0	6.27418	70.709	PSMA5;PSMB2;PSMC4;PSMD2;PSMC1;PSMD3;PLK1;CDK1;BUB3
transmembrane receptor protein tyrosine kinase signaling pathway (GO:0007169)	22/397	1.38737e-05	0.00119996	0	0	2.82013	31.5446	ATP6V1A;ACTR2;HSP90AA1;ARPC1B;CD3E;MAPK14;ACTB;VAV1;ACTG1;HNRNPM;PTBP1;ZAP70;RAB14;LCK;POLR2B;HNRNPH1;HNRNPF;DDIT4;ELMO1;POLR2H;HNRNPA1;PAK2
3'-UTR-mediated mRNA stabilization (GO:0070935)	5/17	1.45446e-05	0.00123702	0	0	14.9678	166.716	HNRNPC;MAPK14;TARDBP;ELAVL1;HNRNPA0
cotranslational protein targeting to membrane (GO:0006613)	10/94	1.59479e-05	0.00131261	0	0	5.41389	59.8029	RPS17;RPL3;RPS8;RPS5;RPLP0;RPL22;RPS3;RPL24;RPSA;RPS24
mRNA 3'-end processing (GO:0031124)	9/75	1.59372e-05	0.00133324	0	0	6.10687	67.4617	NUDT21;AHCYL1;DDX39A;PABPN1;EIF4A3;CSTF2T;U2AF1;PABPC1;SRSF6
positive regulation of ubiquitin-protein ligase activity involved in regulation of mitotic cell cycle transition (GO:0051437)	9/77	1.9776e-05	0.00160186	0	0	5.94825	64.4257	PSMA5;PSMB2;PSMC4;PSMD2;PSMC1;PSMD3;PLK1;CDK1;BUB3
ciliary basal body-plasma membrane docking (GO:0097711)	10/97	2.1056e-05	0.00167889	0	0	5.24645	56.4955	DYNC1H1;ACTR1A;HSP90AA1;TUBA1A;DCTN1;TUBB;PLK1;CDK1;DYNLL1;TUBB4B
T cell receptor signaling pathway (GO:0050852)	13/164	2.24857e-05	0.0017653	0	0	4.03401	43.1745	CD3E;PSMA5;ZAP70;PSMB2;LCK;PSMC4;PSMD2;PSMC1;PSMD3;UBE2N;PLCG1;CD247;PAK2
protein targeting to ER (GO:0045047)	10/98	2.30446e-05	0.00178177	0	0	5.19292	55.4504	RPS17;RPL3;RPS8;RPS5;RPL22;RPLP0;RPS3;RPL24;RPSA;RPS24
regulation of mRNA splicing, via spliceosome (GO:0048024)	8/61	2.45413e-05	0.00186917	0	0	6.67418	70.8474	HNRNPL;PTBP1;RBM4;DDX5;TRA2B;HNRNPU;SRSF6;HNRNPA1
anaphase-promoting complex-dependent catabolic process (GO:0031145)	9/80	2.69938e-05	0.00202572	0	0	5.72519	60.2285	PSMA5;PSMB2;PSMC4;PSMD2;PSMC1;PSMD3;PLK1;CDK1;BUB3
IRES-dependent viral translational initiation (GO:0075522)	4/10	2.80748e-05	0.00207632	0	0	20.3562	213.346	PTBP1;PCBP2;EIF3F;EIF3A
positive regulation of type I interferon production (GO:0032481)	8/63	3.11912e-05	0.00227384	0	0	6.4623	67.0488	XRCC6;DDX3X;IFI16;DHX9;PRKDC;STAT1;XRCC5;POLR2H
cellular response to DNA damage stimulus (GO:0006974)	19/330	3.18004e-05	0.00228559	0	0	2.93006	30.3438	FEN1;LIG1;MCM7;PRKDC;RFC2;XPC;SMC1A;MAPK14;TANK;RNF168;KIN;DDX39A;TRIM28;FANCD2;RPS3;CDK1;INTS7;UBA1;RAD18
positive regulation of DNA metabolic process (GO:0051054)	9/83	3.63315e-05	0.00253972	0	0	5.51826	56.4122	RNF168;USP7;DNMT1;TRIM28;DHX9;USP9X;RPS3;UBE2N;PML
positive regulation of ubiquitin protein ligase activity (GO:1904668)	9/83	3.63315e-05	0.002575	0	0	5.51826	56.4122	PSMA5;PSMB2;PSMC4;PSMD2;PSMC1;PSMD3;PLK1;CDK1;BUB3
positive regulation of telomere maintenance via telomerase (GO:0032212)	6/33	3.91596e-05	0.00270043	0	0	9.25283	93.8965	CCT3;CCT6A;CCT2;XRCC5;TCP1;HNRNPA1
peptide biosynthetic process (GO:0043043)	13/175	4.44494e-05	0.00302434	0	0	3.78044	37.8844	RPL3;RPS8;RPS5;PABPC4;RPL22;RPLP0;RPSA;EEF1A1;RPS17;RPS3;RPL24;IGF2BP3;RPS24
protein modification by small protein conjugation (GO:0032446)	21/399	4.61272e-05	0.0030972	0	0	2.67845	26.742	ZNF451;USP7;SEH1L;PRKDC;USP9X;UBA5;PLK1;SUMO4;NEDD8;ISG15;RNF40;MIB1;RNF168;ZNRF1;RNF213;TRIM28;RACK1;UBE2N;ELOB;UBA1;RAD18
regulation of type I interferon production (GO:0032479)	9/86	4.82678e-05	0.00319884	0	0	5.32576	52.9314	XRCC6;IFI16;DHX9;PRKDC;XRCC5;PCBP2;TAX1BP1;ISG15;POLR2H
positive regulation of response to DNA damage stimulus (GO:2001022)	7/50	5.17108e-05	0.00334026	0	0	7.12468	70.3195	RNF168;DDX5;TRIM28;DHX9;RPS3;UBE2N;CCAR2
protein stabilization (GO:0050821)	12/153	5.13381e-05	0.0033587	0	0	3.99142	39.4236	BAG6;CCT6A;CCT3;CCT2;USP7;HSP90AA1;HSP90AB1;GNAQ;PTGES3;TCP1;FLNA;SUGT1
viral life cycle (GO:0019058)	10/108	5.35543e-05	0.0034161	0	0	4.71209	46.3425	SEH1L;HSP90AB1;XPO1;CD81;KPNA2;PPIA;EPS15;PPID;KPNB1;RAB7A
negative regulation of protein phosphorylation (GO:0001933)	13/179	5.61558e-05	0.00353782	0	0	3.69596	36.1738	RB1;H2AFY;PRKDC;GSTP1;QARS;GNAQ;DDIT4;FKBP8;RACK1;PTPN6;CALM1;TARDBP;PAK2
positive regulation of protein ubiquitination involved in ubiquitin-dependent protein catabolic process (GO:2000060)	9/88	5.79392e-05	0.00360565	0	0	5.20472	50.7778	PSMA5;PSMB2;PSMC4;PSMD2;PSMC1;PSMD3;PLK1;CDK1;BUB3
termination of RNA polymerase II transcription (GO:0006369)	8/69	6.07842e-05	0.00373713	0	0	5.90036	57.2817	NUDT21;DDX39A;PABPN1;EIF4A3;CSTF2T;U2AF1;SNRPD3;SRSF6
negative regulation of cell cycle G2/M phase transition (GO:1902750)	8/70	6.74665e-05	0.00409859	0	0	5.81607	55.8568	PSMA5;H2AFY;PSMB2;PSMC4;PSMD2;PSMC1;PSMD3;PLK1
Fc-gamma receptor signaling pathway involved in phagocytosis (GO:0038096)	11/134	6.95081e-05	0.00417294	0	0	4.17759	39.9965	ACTR2;HSP90AA1;HSP90AB1;ARPC1B;ELMO1;PLCG1;CD247;ACTB;VAV1;ACTG1;MYO1G
protein ubiquitination (GO:0016567)	24/507	7.24349e-05	0.00424868	0	0	2.40902	22.9648	USP7;RNF13;PRKDC;USP9X;PLK1;NEDD8;ISG15;TANK;RNF40;MIB1;PSMA5;RNF168;ZNRF1;RNF213;PSMB2;PSMC4;PSMD2;PSMC1;PSMD3;RACK1;UBE2N;ELOB;UBA1;RAD18
proteasome-mediated ubiquitin-dependent protein catabolic process (GO:0043161)	17/292	7.18529e-05	0.00426355	0	0	2.96281	28.2678	FAF1;PLK1;FAF2;PML;PSMA5;BAG6;ATXN3;NSFL1C;ZNRF1;PSMB2;PSMC4;PSMD2;PSMC1;PSMD3;PCBP2;CDK1;BUB3
Fc-gamma receptor signaling pathway (GO:0038094)	11/135	7.4365e-05	0.00431232	0	0	4.14664	39.4201	ACTR2;HSP90AA1;HSP90AB1;ARPC1B;ELMO1;PLCG1;CD247;ACTB;VAV1;ACTG1;MYO1G
Fc receptor mediated stimulatory signaling pathway (GO:0002431)	11/136	7.95095e-05	0.00450819	0	0	4.11615	38.855	ACTR2;HSP90AA1;HSP90AB1;ARPC1B;ELMO1;PLCG1;CD247;ACTB;VAV1;ACTG1;MYO1G
proteasomal protein catabolic process (GO:0010498)	15/238	7.87228e-05	0.00451374	0	0	3.20739	30.3085	FAF1;PML;PSMA5;BAG6;ATXN3;NSFL1C;ZNRF1;PSMB2;PSMC4;PSMD2;PSMC1;PSMD3;PCBP2;CDK1;BUB3
negative regulation of ubiquitin-protein ligase activity involved in mitotic cell cycle (GO:0051436)	8/72	8.26696e-05	0.00463586	0	0	5.65451	53.1561	PSMA5;PSMB2;PSMC4;PSMD2;PSMC1;PSMD3;CDK1;BUB3
regulation of DNA repair (GO:0006282)	6/38	8.98471e-05	0.00498359	0	0	8.03536	74.8686	RNF168;TRIM28;DHX9;RPS3;UBE2N;PML
viral translation (GO:0019081)	4/13	9.12142e-05	0.00500501	0	0	15.6586	145.661	PTBP1;PCBP2;EIF3F;EIF3A
transcription-coupled nucleotide-excision repair (GO:0006283)	8/74	0.000100609	0.00546178	0	0	5.50168	50.639	POLD3;USP7;LIG1;RFC2;POLR2B;GPS1;POLR2H;COPS8
positive regulation of DNA repair (GO:0045739)	6/39	0.00010444	0.00561007	0	0	7.82932	71.7706	RNF168;TRIM28;DHX9;MGMT;RPS3;UBE2N
negative regulation of proteasomal ubiquitin-dependent protein catabolic process (GO:0032435)	5/25	0.00010971	0.00583177	0	0	10.1781	92.8007	BAG6;USP14;USP7;HSP90AB1;CCAR2
regulation of mitotic cell cycle (GO:0007346)	12/166	0.000112682	0.00592802	0	0	3.67884	33.4441	RB1;DYNC1H1;MAP2K2;MAP3K1;DCTN1;STK26;PLK1;CDK1;HNRNPU;XPC;OXSR1;PAK2
modification-dependent protein catabolic process (GO:0019941)	11/142	0.000117228	0.00610421	0	0	3.94223	35.6827	BAG6;RNF168;ATXN3;RANBP1;RNF213;PSMD3;ADRM1;ISG15;UBA1;NEDD8;RNF40
peptidyl-proline modification (GO:0018208)	6/41	0.00013925	0.00717768	0	0	7.4474	66.1273	NTMT1;FKBP8;CWC27;FKBP4;PPIA;PPID
cellular protein complex assembly (GO:0043623)	11/145	0.000141206	0.00720576	0	0	3.86067	34.2259	SEPT9;CCT2;SEPT6;HSP90AA1;HSP90AB1;PTGES3;TCP1;ADRM1;SEPT1;CD3E;EPS15
viral release from host cell (GO:0019076)	3/6	0.0001441	0.00728062	0	0	25.4453	225.064	PPIA;PPID;RAB7A
negative regulation of ubiquitin protein ligase activity (GO:1904667)	8/78	0.000146209	0.00731474	0	0	5.21955	46.0911	PSMA5;PSMB2;PSMC4;PSMD2;PSMC1;PSMD3;CDK1;BUB3
Ras protein signal transduction (GO:0007265)	14/224	0.000147852	0.00732514	0	0	3.18066	28.0512	RB1;RAB2A;DNMT1;MAPK14;RAB11B;TRIM28;RAB14;CFL1;G3BP1;GNB1;ELMO1;PAK2;KPNB1;RAB7A
cytoskeleton-dependent intracellular transport (GO:0030705)	5/27	0.000161403	0.00777018	0	0	9.42418	82.2883	TUBA1C;TUBA1B;TUBA1A;TUBB;DYNLL1
fibroblast growth factor receptor signaling pathway (GO:0008543)	8/79	0.000159937	0.00777293	0	0	5.15348	45.0452	PTBP1;HNRNPM;RAB14;HNRNPH1;POLR2B;HNRNPF;POLR2H;HNRNPA1
positive regulation of translation (GO:0045727)	8/79	0.000159937	0.00784767	0	0	5.15348	45.0452	FXR1;CDC123;DDX3X;DHX9;EIF4A3;VIM;EEF2;ELAVL1
positive regulation of telomerase RNA localization to Cajal body (GO:1904874)	4/15	0.000168791	0.0080499	0	0	13.5708	117.888	CCT3;CCT6A;CCT2;TCP1
regulation of telomerase activity (GO:0051972)	6/43	0.000182662	0.00855159	0	0	7.10101	61.1246	CCT2;HSP90AA1;HSP90AB1;XRCC5;PTGES3;TCP1
positive regulation of protein localization to nucleus (GO:1900182)	6/43	0.000182662	0.00863077	0	0	7.10101	61.1246	CCT3;CCT6A;CCT2;PLK1;TCP1;CDK1
NIK/NF-kappaB signaling (GO:0038061)	8/81	0.000190583	0.00884134	0	0	5.02623	43.0518	PSMA5;PSMB2;PSMC4;PSMD2;PSMC1;PSMD3;COPS8;TANK
G2/M transition of mitotic cell cycle (GO:0000086)	10/127	0.00020807	0.00931386	0	0	4.00713	33.971	DYNC1H1;ACTR1A;HSP90AA1;TUBA1A;DCTN1;TUBB;PLK1;CDK1;DYNLL1;TUBB4B
positive regulation of cellular amide metabolic process (GO:0034250)	7/62	0.00020805	0.00939539	0	0	5.74571	48.7106	FXR1;DDX3X;EIF4A3;RACK1;VIM;EEF2;ELAVL1
RNA 3'-end processing (GO:0031123)	7/62	0.00020805	0.00947928	0	0	5.74571	48.7106	NUDT21;DDX39A;PABPN1;EIF4A3;CSTF2T;U2AF1;SRSF6
cilium assembly (GO:0060271)	16/289	0.00020728	0.00952928	0	0	2.81747	23.8962	DYNC1H1;ACTR2;HSP90AA1;DCTN1;TUBB;PLK1;SEPT1;DYNLL1;TUBB4B;SEPT9;ACTR1A;SEPT6;TUBA1A;CDK1;FLNA;DYNLRB1
cell cycle G2/M phase transition (GO:0044839)	10/128	0.00022183	0.00984349	0	0	3.97583	33.451	DYNC1H1;ACTR1A;HSP90AA1;TUBA1A;DCTN1;TUBB;PLK1;CDK1;DYNLL1;TUBB4B
regulation of defense response to virus by virus (GO:0050690)	5/29	0.000229886	0.0100266	0	0	8.77424	73.5099	LCK;ELMO1;CD247;DOCK2;PAK2
dopamine receptor signaling pathway (GO:0007212)	5/29	0.000229886	0.010113	0	0	8.77424	73.5099	GNA15;GNG2;GNAQ;GNB1;FLNA
protein localization to cytoplasmic stress granule (GO:1903608)	3/7	0.000248498	0.0105674	0	0	21.8103	181.027	DDX3X;DHX9;YBX1
exit from host cell (GO:0035891)	3/7	0.000248498	0.0106562	0	0	21.8103	181.027	PPIA;PPID;RAB7A
rRNA-containing ribonucleoprotein complex export from nucleus (GO:0071428)	3/7	0.000248498	0.0107465	0	0	21.8103	181.027	XPO1;RPSA;ABCE1
DNA-templated transcription, termination (GO:0006353)	9/107	0.000262251	0.0110601	0	0	4.28052	35.298	NUDT21;DDX39A;PABPN1;EIF4A3;CSTF2T;U2AF1;SNRPD3;POLR2H;SRSF6
protein alkylation (GO:0008213)	5/30	0.00027145	0.0113542	0	0	8.48176	69.65	EEF1A1;KIN;SNRPD3;EEF2;CALM1
Fc-epsilon receptor signaling pathway (GO:0038095)	12/183	0.000280227	0.011626	0	0	3.33709	27.2971	PSMA5;MAP3K1;PSMB2;PSMC4;PSMD2;PSMC1;PSMD3;UBE2N;PLCG1;CALM1;PAK2;VAV1
chaperone-mediated protein complex assembly (GO:0051131)	4/17	0.000285279	0.0117402	0	0	11.9743	97.7344	CCT2;HSP90AA1;HSP90AB1;PTGES3
Fc receptor signaling pathway (GO:0038093)	12/184	0.00029458	0.012026	0	0	3.31895	26.9829	PSMA5;MAP3K1;PSMB2;PSMC4;PSMD2;PSMC1;PSMD3;UBE2N;PLCG1;CALM1;PAK2;VAV1
protein methylation (GO:0006479)	6/47	0.000301154	0.0121007	0	0	6.49667	52.6743	EEF1A1;KIN;NTMT1;SNRPD3;EEF2;CALM1
cellular response to ionizing radiation (GO:0071479)	6/47	0.000301154	0.0121967	0	0	6.49667	52.6743	XRCC6;IFI16;XRCC5;INTS7;MAPK14;TANK
regulation of proteasomal ubiquitin-dependent protein catabolic process (GO:0032434)	8/89	0.000365265	0.0141208	0	0	4.57443	36.2061	BAG6;USP7;HSP90AB1;PLK1;RACK1;RAD23A;RAD23B;CCAR2
positive regulation of viral genome replication (GO:0045070)	5/32	0.000371422	0.0141445	0	0	7.95165	62.8035	DDX3X;RAD23A;PABPC1;PPIA;PPID
regulation of gene silencing by miRNA (GO:0060964)	7/68	0.000370822	0.0142279	0	0	5.23874	41.3849	FXR1;SEH1L;DHX9;POLR2B;H3F3A;POLR2H;ELAVL1
regulation of stem cell differentiation (GO:2000736)	8/89	0.000365265	0.0142286	0	0	4.57443	36.2061	PSMA5;PSMB2;PSMC4;PSMD2;PSMC1;PSMD3;H3F3A;HNRNPU
regulation of apoptotic process (GO:0042981)	31/816	0.000377099	0.0142543	0	0	1.93334	15.2406	ITGB1;DDX3X;PRKDC;GSTP1;FAF1;CD3E;IER3IP1;TANK;CCAR2;CFL1;RACK1;RPS3;FLNA;PAK2;MAP2K2;MAP3K1;MGMT;STAT1;PLK1;PA2G4;PNMA2;OXSR1;VAV1;HNRNPK;LCK;STK26;CDK1;ANP32E;ARHGEF2;TARDBP;PPID
DNA ligation (GO:0006266)	4/18	0.000361127	0.0142855	0	0	11.309	89.6385	POLD3;XRCC6;LIG1;MGMT
regulation of cell cycle (GO:0051726)	13/216	0.000364346	0.014302	0	0	3.06286	24.2499	RB1;MAP3K1;MAP2K2;PLK1;HNRNPU;RAD23A;OXSR1;CDK6;STK26;RACK1;CDK1;TARDBP;PAK2
regulation of telomerase RNA localization to Cajal body (GO:1904872)	4/18	0.000361127	0.0143971	0	0	11.309	89.6385	CCT3;CCT6A;CCT2;TCP1
establishment of integrated proviral latency (GO:0075713)	3/8	0.000391805	0.014594	0	0	19.084	149.709	XRCC6;XRCC5;PPIA
regulation of stress-activated protein kinase signaling cascade (GO:0070302)	3/8	0.000391805	0.0147013	0	0	19.084	149.709	MAP2K2;GSTP1;NBR1
positive regulation of transferase activity (GO:0051347)	10/138	0.000406672	0.015038	0	0	3.68772	28.7919	CCT2;HSP90AA1;HSP90AB1;PABPN1;XRCC5;RFC2;PTGES3;PLK1;TCP1;UBE2N
regulation of cytokine-mediated signaling pathway (GO:0001959)	8/91	0.000424866	0.0155978	0	0	4.4739	34.7342	HSP90AB1;IFNGR1;STAT1;RACK1;TAX1BP1;PTPN6;ABCE1;TANK
positive regulation of cellular protein metabolic process (GO:0032270)	8/92	0.000457498	0.0166758	0	0	4.42527	34.0292	FXR1;HSP90AA1;DDX3X;EIF4A3;PLK1;VIM;EEF2;ELAVL1
vascular endothelial growth factor receptor signaling pathway (GO:0048010)	7/71	0.000483746	0.0175075	0	0	5.01738	38.3024	HSP90AA1;ELMO1;MAPK14;PAK2;ACTB;VAV1;ACTG1
cell cycle G1/S phase transition (GO:0044843)	8/93	0.000492134	0.0176856	0	0	4.37768	33.3438	RB1;PPP6C;RANBP1;CDK6;MCM7;MCM4;MCM6;MCM2
cellular response to tumor necrosis factor (GO:0071356)	12/195	0.000498293	0.0177817	0	0	3.13173	23.8147	PSMA5;PSMB2;DHX9;STAT1;PSMC4;PSMD2;PSMC1;PSMD3;RPS3;ARHGEF2;TANK;TXNDC17
regulation of transcription from RNA polymerase II promoter in response to stress (GO:0043618)	8/94	0.000528865	0.0184849	0	0	4.33111	32.6773	PSMA5;PSMB2;PSMC4;PSMD2;PSMC1;PSMD3;ELOB;GCN1
regulation of cellular amino acid metabolic process (GO:0006521)	6/52	0.000525808	0.0185048	0	0	5.87199	44.3369	PSMA5;PSMB2;PSMC4;PSMD2;PSMC1;PSMD3
regulation of cellular amine metabolic process (GO:0033238)	6/52	0.000525808	0.0186333	0	0	5.87199	44.3369	PSMA5;PSMB2;PSMC4;PSMD2;PSMC1;PSMD3
positive regulation of gene silencing by miRNA (GO:2000637)	4/20	0.000554288	0.0192417	0	0	10.1781	76.3138	FXR1;DDX5;MAP2K2;DHX9
negative regulation of cellular macromolecule biosynthetic process (GO:2000113)	22/513	0.000560476	0.0193251	0	0	2.18244	16.3393	RB1;XRCC6;DDX3X;XRCC5;NONO;EIF4A3;ENO1;PA2G4;PML;CCAR2;FXR1;SYNCRIP;RBM4;SFPQ;QARS;IFI16;TRIM28;NCL;RACK1;RPS3;IGF2BP1;IGF2BP3
positive regulation of establishment of protein localization to telomere (GO:1904851)	3/9	0.000579153	0.0194435	0	0	16.9635	126.445	CCT6A;CCT2;TCP1
cellular response to fibroblast growth factor stimulus (GO:0044344)	8/95	0.000567783	0.0194456	0	0	4.28552	32.029	PTBP1;HNRNPM;RAB14;HNRNPH1;POLR2B;HNRNPF;POLR2H;HNRNPA1
establishment of viral latency (GO:0019043)	3/9	0.000579153	0.0195723	0	0	16.9635	126.445	XRCC6;XRCC5;PPIA
phagolysosome assembly (GO:0001845)	3/9	0.000579153	0.0197028	0	0	16.9635	126.445	RAB14;CORO1A;RAB7A
RNA export from nucleus (GO:0006405)	9/120	0.000612035	0.0204132	0	0	3.81679	28.2394	RANBP1;DDX39A;SEH1L;EIF4A3;HNRNPA2B1;RPSA;U2AF1;SRSF6;HNRNPA1
regulation of mitotic spindle organization (GO:0060236)	5/36	0.000651987	0.0216045	0	0	7.06814	51.8482	DYNC1H1;DCTN1;PLK1;HNRNPU;SMC1A
intrinsic apoptotic signaling pathway in response to DNA damage by p53 class mediator (GO:0042771)	4/21	0.000674161	0.0220529	0	0	9.69344	70.7819	BAG6;IFI16;DDIT4;PML
RNA-dependent DNA biosynthetic process (GO:0006278)	4/21	0.000674161	0.0221951	0	0	9.69344	70.7819	HSP90AA1;HSP90AB1;PTGES3;PPIA
tumor necrosis factor-mediated signaling pathway (GO:0033209)	9/124	0.000775566	0.0250488	0	0	3.69367	26.4538	PSMA5;PSMB2;STAT1;PSMC4;PSMD2;PSMC1;PSMD3;TANK;TXNDC17
activation of protein kinase activity (GO:0032147)	13/234	0.000774248	0.0251655	0	0	2.82725	20.2534	OSBPL8;MAP3K1;MAP2K2;CD81;OXSR1;MAPK14;TANK;STK26;UBE2N;CDK1;PLCG1;COPS8;PAK2
regulation of hematopoietic stem cell differentiation (GO:1902036)	7/77	0.000791148	0.0253914	0	0	4.62642	33.042	PSMA5;PSMB2;PSMC4;PSMD2;PSMC1;PSMD3;H3F3A
regulation of establishment of protein localization to telomere (GO:0070203)	3/10	0.000815331	0.0258425	0	0	15.2672	108.579	CCT6A;CCT2;TCP1
actin filament depolymerization (GO:0030042)	3/10	0.000815331	0.026004	0	0	15.2672	108.579	WDR1;CFL1;DSTN
protein peptidyl-prolyl isomerization (GO:0000413)	5/38	0.000840629	0.0264798	0	0	6.69613	47.4177	FKBP8;CWC27;FKBP4;PPIA;PPID
regulation of hematopoietic progenitor cell differentiation (GO:1901532)	7/78	0.000854733	0.0267589	0	0	4.5671	32.2653	PSMA5;PSMB2;PSMC4;PSMD2;PSMC1;PSMD3;H3F3A
ribosome assembly (GO:0042255)	6/57	0.000863202	0.0268593	0	0	5.3569	37.7922	RPS17;DDX3X;RPL3;RPS5;RPL24;RPSA
regulation of transcription from RNA polymerase II promoter in response to hypoxia (GO:0061418)	7/79	0.000922283	0.0283519	0	0	4.50929	31.5139	PSMA5;PSMB2;PSMC4;PSMD2;PSMC1;PSMD3;ELOB
regulation of cellular response to heat (GO:1900034)	7/79	0.000922283	0.0285237	0	0	4.50929	31.5139	HSP90AA1;HSP90AB1;SEH1L;HSPH1;PTGES3;FKBP4;CCAR2
nucleotide-excision repair, DNA damage recognition (GO:0000715)	4/23	0.000966981	0.0295479	0	0	8.85054	61.4345	GPS1;XPC;COPS8;RAD23B
non-canonical Wnt signaling pathway (GO:0035567)	9/128	0.000973048	0.0295563	0	0	3.57824	24.8154	PSMA5;GNG2;PSMB2;PSMC4;PSMD2;PSMC1;PSMD3;GNB1;CALM1
negative regulation of mitotic cell cycle phase transition (GO:1901991)	7/80	0.000993969	0.0300132	0	0	4.45293	30.7867	RB1;PSMA5;PSMB2;PSMC4;PSMD2;PSMC1;PSMD3
post-Golgi vesicle-mediated transport (GO:0006892)	6/59	0.00103714	0.0311326	0	0	5.17531	35.5611	CHIC2;MYO1B;RAB14;EPS15;SCAMP3;VTI1B
RNA transport (GO:0050658)	7/81	0.00106997	0.03193	0	0	4.39795	30.0826	RANBP1;DDX39A;EIF4A3;HNRNPA2B1;U2AF1;SRSF6;HNRNPA1
cytoplasmic mRNA processing body assembly (GO:0033962)	3/11	0.00110479	0.0325882	0	0	13.8793	94.4913	DYNC1H1;LSM14A;PATL1
positive regulation of protein localization to chromosome, telomeric region (GO:1904816)	3/11	0.00110479	0.0327777	0	0	13.8793	94.4913	CCT6A;CCT2;TCP1
G1/S transition of mitotic cell cycle (GO:0000082)	8/106	0.00116928	0.034292	0	0	3.8408	25.9307	RB1;PPP6C;RANBP1;CDK6;MCM7;MCM4;MCM6;MCM2
mitotic sister chromatid segregation (GO:0000070)	7/83	0.00123561	0.0360303	0	0	4.29198	28.7399	NAA50;SEH1L;PLK1;KIF2C;SMC1A;KPNB1;SMC2
negative regulation of viral life cycle (GO:1903901)	6/62	0.00134702	0.0386172	0	0	4.9249	32.5529	IFITM1;TRIM28;IFI16;ISG15;ZC3HAV1;PML
telomere organization (GO:0032200)	5/42	0.0013361	0.0387394	0	0	6.0584	40.0945	POLD3;XRCC6;XRCC5;PTGES3;H3F3A
regulation of cellular ketone metabolic process (GO:0010565)	6/62	0.00134702	0.0388353	0	0	4.9249	32.5529	PSMA5;PSMB2;PSMC4;PSMD2;PSMC1;PSMD3
regulation of gene expression (GO:0010468)	35/1038	0.00136236	0.0388387	0	0	1.71596	11.3229	RB1;EIF4A2;EIF4A1;DNMT1;DDX3X;CELF1;DHX9;SRRT;EIF4A3;TULP3;YBX1;CD3E;IFI16;TRA2B;RACK1;RPS3;CPNE1;UBAP2L;BPTF;NDFIP1;MAP2K2;H2AFY;NONO;MAPK14;PML;SFPQ;DDX39A;CDK6;ACTC1;FUBP3;HNRNPH1;HNRNPF;CDK1;MATR3;TARDBP
cellular protein modification process (GO:0006464)	34/1002	0.0014345	0.040668	0	0	1.72683	11.3054	PRKDC;GMFG;GPS1;NEDD8;DCAF5;TIMM50;PPP6C;PSMB2;PSMD2;PSMD3;ELOB;PAK2;RAB2A;PRKCH;MAP3K1;PLK1;VRK1;ISG15;OXSR1;PTPN14;PPP1CA;RAB11B;PSMA5;ZAP70;CDK6;PSMC4;LCK;PSMC1;STK26;CDK1;UBE2N;PTPN6;COPS8;METAP1
purine nucleoside monophosphate biosynthetic process (GO:0009127)	3/12	0.00145168	0.0407029	0	0	12.7226	83.1429	ATIC;GMPS;GART
negative regulation of G2/M transition of mitotic cell cycle (GO:0010972)	6/63	0.00146459	0.0408404	0	0	4.84672	31.6306	PSMA5;PSMB2;PSMC4;PSMD2;PSMC1;PSMD3
positive regulation of establishment of protein localization (GO:1904951)	3/12	0.00145168	0.0409278	0	0	12.7226	83.1429	CCT6A;CCT2;TCP1
protein depolymerization (GO:0051261)	4/26	0.00155847	0.0429886	0	0	7.82932	50.6091	WDR1;CFL1;DSTN;KIF2C
regulation of spindle assembly (GO:0090169)	4/26	0.00155847	0.0432222	0	0	7.82932	50.6091	DYNC1H1;PLK1;HNRNPU;SMC1A
nuclear-transcribed mRNA catabolic process, deadenylation-dependent decay (GO:0000288)	6/64	0.00158981	0.0436172	0	0	4.77099	30.745	EIF4A2;EIF4A1;DIS3;EIF4A3;PABPC1;PATL1
intrinsic apoptotic signaling pathway by p53 class mediator (GO:0072332)	5/44	0.00165195	0.04484	0	0	5.78302	37.0449	BAG6;DDX5;IFI16;DDIT4;PML
RNA catabolic process (GO:0006401)	5/44	0.00165195	0.0450798	0	0	5.78302	37.0449	FEN1;DIS3;PABPC4;PPP1R8;SND1
positive regulation of viral process (GO:0048524)	5/45	0.00182893	0.0491213	0	0	5.65451	35.6462	DHX9;POLR2B;CFL1;POLR2H;RAB7A
positive regulation of viral life cycle (GO:1903902)	5/45	0.00182893	0.0493812	0	0	5.65451	35.6462	DDX3X;RAD23A;PABPC1;PPIA;PPID
antigen receptor-mediated signaling pathway (GO:0050851)	13/258	0.00186959	0.0496902	0	0	2.56425	16.1087	CD3E;PSMA5;ZAP70;PSMB2;PSMC4;LCK;PSMD2;PSMC1;PSMD3;UBE2N;PLCG1;CD247;PAK2
positive regulation of canonical Wnt signaling pathway (GO:0090263)	8/114	0.00186399	0.0498007	0	0	3.57127	22.4456	PSMA5;DDX3X;PSMB2;PSMC4;PSMD2;PSMC1;PSMD3;CCAR2

## Sheet: GO_Molecular_Function
Term	Overlap	P-value	Adjusted P-value	Old P-value	Old Adjusted P-value	Odds Ratio	Combined Score	Genes
RNA binding (GO:0003723)	125/1388	3.85426e-50	4.43625e-47	0	0	4.58309	521.464	EIF4A2;EIF4A1;RPL3;RRP1;EIF4A3;RTCB;HDLBP;HNRNPU;HNRNPR;ENO1;CCAR2;FBL;RPS17;TRIM28;UBAP2L;SNRPD3;KPNA2;DDX18;SNRPN;RPS8;RPS5;RPL22;RPSA;ILF2;SND1;EEF1A1;DDX39A;HNRNPUL1;NCL;RPL24;MATR3;FKBP4;SRSF6;PPIA;KPNB1;DDX5;PRKDC;DHX9;ZC3HAV1;NTPCR;CORO1A;PRPF8;FXR1;PRDX1;PCBP1;G3BP1;PCBP2;GCN1;YARS;FDPS;XRCC6;XRCC5;NONO;PA2G4;EEF2;EIF2S2;HNRNPL;CCT6A;HNRNPM;HNRNPK;FUBP3;HNRNPF;UBE2N;UBA1;HNRNPC;LSM14A;EIF…
mRNA binding (GO:0003729)	28/180	2.07892e-17	1.19642e-14	0	0	7.91631	304.082	EIF4A1;DDX5;DDX3X;DHX9;CELF1;EIF4A3;HNRNPU;CSTF2T;ELAVL1;FXR1;RBM4;PCBP1;TRA2B;G3BP1;PPP1R8;RPS3;IGF2BP1;IGF2BP3;RPS5;RNF40;HNRNPM;NUDT21;NCL;HNRNPA2B1;HNRNPC;PABPC1;TARDBP;EIF3A
cadherin binding (GO:0045296)	32/314	2.69616e-14	1.03443e-11	0	0	5.1863	162.043	ITGB1;DDX3X;HSP90AB1;HDLBP;ENO1;ZC3HAV1;CLINT1;CNN2;SEPT9;LDHA;ATIC;PCBP1;PRDX1;RACK1;FLNA;CLIC1;EPS15;PAK2;GCN1;RANBP1;STAT1;EEF2;SND1;RAB11B;PPP1CA;EEF1G;MYO1B;HNRNPK;RPL24;MYH9;TAGLN2;EIF4G2
purine ribonucleoside triphosphate binding (GO:0035639)	33/397	3.25557e-12	9.36791e-10	0	0	4.2302	111.892	HSP90AB1;ABCD3;DHX9;EIF4A3;HNRNPU;HSPA14;TUBA1C;TUBA1B;SEPT6;HSPH1;TUBA1A;TUBB3;ANXA6;PGK1;RAB2A;HSP90AA1;TUBB;PLK1;OXSR1;TUBB4B;RAB11B;EEF1A1;ZAP70;TUBB2B;MYO1B;CDK6;ACTC1;RAB14;STK26;MYH9;MCM6;ABCE1;RAB7A
pre-mRNA binding (GO:0036002)	11/31	8.73114e-12	2.00991e-09	0	0	18.0579	459.83	HNRNPL;PTBP1;RBM4;DDX5;CELF1;TRA2B;HNRNPU;U2AF1;HNRNPA1;SRSF6;PRPF8
ubiquitin-like protein ligase binding (GO:0044389)	26/298	2.44809e-10	4.69626e-08	0	0	4.44012	98.2622	RB1;FAF1;FAF2;NEDD8;TANK;ACTG1;BAG6;ATXN3;TUBA1B;TRIM28;PCBP2;ELOB;CCT2;USP7;XRCC5;STAT1;TUBB;ISG15;PA2G4;SCAMP3;RNF40;PML;TRAF4;TCP1;UBE2N;RAD18
ubiquitin protein ligase binding (GO:0031625)	25/285	4.88172e-10	8.02694e-08	0	0	4.46409	95.7116	RB1;FAF1;FAF2;NEDD8;TANK;ACTG1;BAG6;ATXN3;TUBA1B;TRIM28;PCBP2;ELOB;CCT2;USP7;XRCC5;TUBB;ISG15;PA2G4;SCAMP3;RNF40;PML;TRAF4;TCP1;UBE2N;RAD18
nucleoside-triphosphatase activity (GO:0017111)	30/425	1.69541e-09	2.43927e-07	0	0	3.59228	72.5473	EIF4A2;EIF4A1;ABCD3;DDX3X;DHX9;HSPA14;SEPT9;SEPT6;GNA15;HSPH1;RNF213;ARHGDIB;RAB2A;NSF;HSP90AA1;SEPT1;WRNIP1;RAB11B;EEF1A1;MYL6;DDX39A;ACTC1;RAB14;PSMC4;PSMC1;GNAQ;GNB1;MYH9;KIF2C;RAB7A
mRNA 3'-UTR binding (GO:0003730)	12/64	3.66649e-09	4.68903e-07	0	0	9.54198	185.344	FXR1;RBM4;DDX5;HNRNPA2B1;IGF2BP1;HNRNPU;IGF2BP3;PABPC1;HNRNPC;TARDBP;ELAVL1;RNF40
ATP-dependent helicase activity (GO:0008026)	13/86	1.27131e-08	1.46328e-06	0	0	7.69276	139.859	EIF4A2;EIF4A1;DDX18;DDX5;DDX3X;MCM7;DDX47;DHX9;EIF4A3;DDX39A;G3BP1;MCM4;MCM6
double-stranded RNA binding (GO:0003725)	11/60	2.12017e-08	2.21847e-06	0	0	9.32994	164.852	FXR1;EIF4A1;TUBA1B;DDX3X;HSP90AB1;DHX9;HNRNPU;VIM;TUBB4B;ELAVL1;ILF2
poly-pyrimidine tract binding (GO:0008187)	7/20	6.66741e-08	6.39516e-06	0	0	17.8117	294.311	PTBP1;HNRNPH1;PABPC4;HNRNPU;HNRNPC;PABPC1;PATL1
kinase binding (GO:0019900)	27/419	7.49774e-08	6.63839e-06	0	0	3.27935	53.8012	RB1;HSP90AB1;DCTN1;FAF1;CD3E;TANK;ELAVL1;ACTB;RPS3;FLNA;PLCG1;PAK2;HNRNPA0;NSF;MAP3K1;H2AFY;PLK1;VRK1;RAD23A;ACSL3;EEF2;EEF1A1;QARS;LCK;TAX1BP1;PTPN6;CALM1
double-stranded DNA binding (GO:0003690)	13/100	8.10288e-08	6.66172e-06	0	0	6.61578	108.025	XRCC6;FEN1;H2AFY;PRKDC;DHX9;XRCC5;STAT1;HNRNPU;YBX1;KIN;IFI16;RPS3;TARDBP
ATPase activity (GO:0016887)	18/204	1.24687e-07	9.56768e-06	0	0	4.49035	71.3851	EIF4A2;NSF;DYNC1H1;HSP90AA1;DDX3X;ABCD3;DHX9;WRNIP1;DYNLL1;HSPA14;DDX39A;HSPH1;RNF213;ACTC1;PSMC4;PSMC1;MYH9;KIF2C
ATP binding (GO:0005524)	19/256	8.20405e-07	5.24604e-05	0	0	3.77704	52.9294	HSP90AA1;ABCD3;HSP90AB1;DHX9;EIF4A3;PLK1;HNRNPU;OXSR1;HSPA14;ZAP70;MYO1B;HSPH1;CDK6;ACTC1;STK26;PGK1;MYH9;MCM6;ABCE1
ATP-dependent RNA helicase activity (GO:0004004)	10/68	8.06752e-07	5.46219e-05	0	0	7.48391	105.001	EIF4A2;EIF4A1;DDX18;DDX5;DDX3X;DDX39A;DDX47;DHX9;EIF4A3;G3BP1
RNA-dependent ATPase activity (GO:0008186)	10/69	9.27167e-07	5.61668e-05	0	0	7.37545	102.453	EIF4A2;EIF4A1;DDX18;DDX5;DDX3X;DDX39A;DDX47;DHX9;EIF4A3;G3BP1
RNA helicase activity (GO:0003724)	10/68	8.06752e-07	5.80358e-05	0	0	7.48391	105.001	EIF4A2;EIF4A1;DDX18;DDX5;DDX3X;DDX39A;DDX47;DHX9;EIF4A3;G3BP1
GTP binding (GO:0005525)	14/148	1.37624e-06	7.92026e-05	0	0	4.81397	64.9701	RAB2A;TUBB;TUBB4B;RAB11B;EEF1A1;TUBA1C;SEPT6;TUBA1B;TUBB2B;TUBA1A;RAB14;TUBB3;ANXA6;RAB7A
poly-purine tract binding (GO:0070717)	6/20	1.70091e-06	9.32262e-05	0	0	15.2672	202.814	DDX3X;PABPC4;EIF4A3;HNRNPU;PABPC1;PATL1
protein kinase binding (GO:0019901)	27/496	2.04829e-06	0.000107163	0	0	2.77025	36.2862	DCTN1;GSTP1;FAF1;CD3E;TANK;ELAVL1;ACTB;RACK1;RPS3;PLCG1;PAK2;HNRNPA0;NSF;HSP90AA1;MAP3K1;H2AFY;PLK1;VRK1;ACSL3;EEF2;EEF1A1;QARS;LCK;NBR1;PTPN6;CD247;CALM1
adenyl ribonucleotide binding (GO:0032559)	19/280	3.11174e-06	0.000155722	0	0	3.45329	43.7889	HSP90AA1;ABCD3;HSP90AB1;DHX9;EIF4A3;PLK1;HNRNPU;OXSR1;HSPA14;ZAP70;MYO1B;HSPH1;CDK6;ACTC1;STK26;PGK1;MYH9;MCM6;ABCE1
purine ribonucleoside binding (GO:0032550)	14/160	3.4798e-06	0.000166885	0	0	4.45293	55.9668	RAB2A;TUBB;TUBB4B;RAB11B;EEF1A1;TUBA1C;SEPT6;TUBA1B;TUBB2B;TUBA1A;RAB14;TUBB3;ANXA6;RAB7A
ubiquitin binding (GO:0043130)	9/63	3.69541e-06	0.000170137	0	0	7.27008	90.9373	RNF168;NSFL1C;FAF1;DDI2;FAF2;ADRM1;NBR1;UBE2N;BUB3
poly(A) binding (GO:0008143)	5/14	4.94035e-06	0.000218705	0	0	18.1752	222.066	DDX3X;PABPC4;EIF4A3;HNRNPU;PABPC1
translation factor activity, RNA binding (GO:0008135)	9/68	7.05712e-06	0.000300842	0	0	6.73552	79.8932	EEF1A1;EEF1G;EIF4A1;EIF3I;EIF3F;EIF2S2;GCN1;EIF3A;EIF4G2
guanyl ribonucleotide binding (GO:0032561)	14/171	7.5502e-06	0.000310367	0	0	4.16648	49.1392	RAB2A;TUBB;TUBB4B;RAB11B;EEF1A1;TUBA1C;SEPT6;TUBA1B;TUBB2B;TUBA1A;RAB14;TUBB3;ANXA6;RAB7A
poly(U) RNA binding (GO:0008266)	5/16	1.04347e-05	0.000400343	0	0	15.9033	182.417	HNRNPH1;PABPC4;HNRNPC;PABPC1;PATL1
DNA polymerase binding (GO:0070182)	5/16	1.04347e-05	0.000414148	0	0	15.9033	182.417	FANCI;HSP90AA1;HSP90AB1;FANCD2;PTGES3
DNA-dependent ATPase activity (GO:0008094)	9/73	1.27519e-05	0.000473466	0	0	6.27418	70.709	DDX3X;MCM7;RFC2;DHX9;G3BP1;MCM4;MCM6;RAD18;BPTF
ATP-dependent DNA helicase activity (GO:0004003)	6/29	1.79477e-05	0.000645556	0	0	10.5291	115.062	DDX3X;MCM7;DHX9;G3BP1;MCM4;MCM6
polyubiquitin modification-dependent protein binding (GO:0031593)	7/44	2.1952e-05	0.000765659	0	0	8.09623	86.8454	BAG6;RNF168;RAD23A;PRPF8;EPS15;RAD23B;RAD18
single-stranded RNA binding (GO:0003727)	7/46	2.96439e-05	0.00100353	0	0	7.74422	80.7432	FXR1;PTBP1;DDX3X;DHX9;HNRNPF;HNRNPU;HNRNPA1
proteasome binding (GO:0070628)	5/20	3.4712e-05	0.00114153	0	0	12.7226	130.642	BAG6;USP14;ADRM1;ISG15;NEDD8
DNA binding (GO:0003677)	36/894	3.94513e-05	0.00126135	0	0	2.04929	20.7807	RB1;HIST2H2AA3;DNMT1;FEN1;DDX3X;MCM7;PRKDC;DHX9;SRRT;HNRNPU;XPC;YBX1;HIST2H2AC;IFI16;TRIM28;PCBP1;RPS3;POLR2H;HNRNPA1;BPTF;XRCC6;H2AFY;STAT1;RFC2;XRCC5;RAD23A;PA2G4;ILF2;RAD23B;KIN;SFPQ;HNRNPK;TRAF4;TARDBP;RAD18;MCM2
single-stranded DNA binding (GO:0003697)	9/88	5.79392e-05	0.00180238	0	0	5.20472	50.7778	HNRNPK;DHX9;PCBP1;HNRNPU;RAD23A;XPC;POLR2H;HNRNPA1;RAD23B
disordered domain specific binding (GO:0097718)	5/23	7.17663e-05	0.00217376	0	0	11.0632	105.566	RB1;HSP90AA1;HSP90AB1;FKBP8;CALM1
T cell receptor binding (GO:0042608)	3/6	0.0001441	0.00404534	0	0	25.4453	225.064	LCK;CD3E;DOCK2
DNA helicase activity (GO:0003678)	6/41	0.00013925	0.00410965	0	0	7.4474	66.1273	DDX3X;MCM7;DHX9;G3BP1;MCM4;MCM6
protein-disulfide reductase activity (GO:0047134)	3/6	0.0001441	0.00414648	0	0	25.4453	225.064	TXNL1;PGK1;TXNDC17
actin filament binding (GO:0051015)	10/128	0.00022183	0.00607921	0	0	3.97583	33.451	ACTR2;MYO1B;TPM4;WDR1;ARPC1B;CFL1;DSTN;MYH9;FLNA;CORO1A
oxidoreductase activity, acting on the CH-OH group of donors, NAD or NADP as acceptor (GO:0016616)	8/89	0.000365265	0.00977722	0	0	4.57443	36.2061	LDHA;BDH2;RDH11;PHGDH;KCNAB2;HMGCR;HSD17B10;ADH5
oxidoreductase activity, acting on a sulfur group of donors, NAD(P) as acceptor (GO:0016668)	3/8	0.000391805	0.0102493	0	0	19.084	149.709	TXNL1;PGK1;TXNDC17
GTPase activity (GO:0003924)	13/223	0.000493581	0.0126247	0	0	2.96672	22.588	RAB2A;DDX3X;SEPT1;RAB11B;EEF1A1;SEPT9;SEPT6;GNA15;RAB14;GNAQ;ARHGDIB;GNB1;RAB7A
core promoter binding (GO:0001047)	8/98	0.000698632	0.017481	0	0	4.15433	30.187	RB1;SFPQ;H2AFY;IFI16;DHX9;STAT1;NONO;HNRNPU
translation initiation factor activity (GO:0003743)	5/37	0.000741842	0.0177887	0	0	6.87711	49.559	EIF3I;EIF3F;EIF2S2;EIF3A;EIF4G2
protein homodimerization activity (GO:0042803)	26/665	0.000731414	0.0179119	0	0	1.98971	14.3667	HSP90AB1;ABCD3;GYPC;TIMM9;ENO1;CD3E;CORO1A;ELAVL1;PAPSS1;FXR1;ATIC;ANXA6;RACK1;CPNE1;FLNA;HSP90AA1;TPM4;STAT1;DCK;RNF40;PML;NUDT21;SFPQ;STK26;MYH9;CD247
Lys48-specific deubiquitinase activity (GO:1990380)	3/10	0.000815331	0.0187689	0	0	15.2672	108.579	ATXN3;USP7;USP9X
mRNA 5'-UTR binding (GO:0048027)	4/22	0.000811291	0.0190571	0	0	9.25283	65.8513	DDX3X;NCL;IGF2BP1;IGF2BP3
peptidyl-prolyl cis-trans isomerase activity (GO:0003755)	5/39	0.000948893	0.0214152	0	0	6.52443	45.4115	FKBP8;CWC27;FKBP4;PPIA;PPID
tumor necrosis factor receptor binding (GO:0005164)	3/11	0.00110479	0.0244542	0	0	13.8793	94.4913	TRAF4;STAT1;TANK
miRNA binding (GO:0035198)	4/25	0.00133927	0.0290849	0	0	8.14249	53.8677	RBM4;HNRNPA2B1;MATR3;HNRNPA1
actin binding (GO:0003779)	13/255	0.00168608	0.0359384	0	0	2.59442	16.5663	CAP1;ITGB1;ACTR2;TPM4;WDR1;ARPC1B;HNRNPU;DSTN;CORO1A;MYO1B;CFL1;FLNA;MYH9
myosin binding (GO:0017022)	5/47	0.00222396	0.0465414	0	0	5.41389	33.0706	KIRREL1;ACTC1;RAB14;CORO1A;RAB11B
thiol-dependent ubiquitinyl hydrolase activity (GO:0036459)	7/93	0.00238645	0.0481895	0	0	3.83047	23.1282	USP14;ATXN3;USP7;USP20;USP9X;EIF3F;TANK
nuclear localization sequence binding (GO:0008139)	4/29	0.00236379	0.0485844	0	0	7.01939	42.4497	KPNA2;IPO4;TNPO3;KPNB1
