# Supplementary material for: Posttranslational Regulation of the Exon Skipping Machinery Controls Aberrant Splicing in Leukemia
Source: Oxford University Press journal article supplement (doi:10.1158/2159-8290.cd-19-1436), 2020-05-22
Supplement: 21598290cd191436-sup-supplementarytable4.xlsx [file 21598290cd191436-sup-supplementarytable4.xlsx]

## Sheet: Sheet1
Supplement Table 4. KEGG Enrichment Analysis of Overlapped rMATS Transcripts in T-cell subtypes vs T-ALL
ID	Pathway	Fold_Enrichment	occurrence	lowest_p	highest_p	Differentially spliced genes (rMATS)
hsa03013	RNA transport	76.0491	39	1.55e-08	1.55e-08	EIF4A2, EIF4A1, SEH1L, RBM8A, POP4, CASC3, AAAS, FXR1, NXF1, FXR2, XPO1, NUP85, NUP62, NUP88, EIF4B, NUP214, EIF2B5, PRMT5, UBE2I, ELAC2, PABPC4, THOC1, UPF3B, THOC5, SRRM1, THOC6, EIF1, DDX39B, NUP50, RPP21, EIF3G, ACIN1, NUP54, PABPC1, PABPC1L, EIF4G2, RAN, EIF4G1, EIF3B
hsa03050	Proteasome	34.5288	12	0.000155	1.55e-05	PSMB4, PSMC5, PSMA4, PSMD4, PSMA1, PSMD13, PSMC4, PSMD2, PSME4, PSME1, PSME2, PSMB8
hsa03040	Spliceosome	32.3885	26	0.000699	0.000699	DDX5, RBM25, RBM8A, DDX23, U2AF1, USP39, U2AF1L4, EFTUD2, SNRNP70, U2AF2, TRA2A, TXNL4A, SF3A2, THOC1, PRPF40A, CWC15, LSM4, HNRNPM, XAB2, DDX39B, SRSF3, PPIE, ACIN1, SRSF5, SRSF7, SLU7
hsa00520	Amino sugar and nucleotide sugar metabolism	30.0694	12	0.00483638	0.00483638	TSTA3, CYB5R1, GALE, GALT, UGP2, AMDHD2, MPI, HEXA, GMPPA, PMM2, RENBP, HK1
hsa04110	Cell cycle	30.008	24	0.00111931	0.00111931	YWHAE, ZBTB17, GSK3B, CREBBP, MCM7, CCNH, PRKDC, HDAC1, CDC25B, CCND3, WEE1, STAG2, TFDP1, CDC45, TFDP2, ESPL1, CCNE1, CHEK2, CDC27, ORC2, CDC16, ANAPC5, E2F4, ATR
hsa05169	Epstein-Barr virus infection	25.3465	33	0.000881	0.000881	PSMD13, HDAC1, PIK3CD, CD3D, MAPK9, HLA-DMA, CCND3, BCL2L11, CASP8, PSMD4, AKT2, PSMD2, AKT1, IKBKG, BID, MAP2K3, IFNAR2, USP7, HLA-C, HLA-A, HLA-F, DDB2, NCOR2, PSMC5, IRF3, PSMC4, CCNE1, IRF7, BAX, VIM, CD247, CD44, IRF9
hsa03015	mRNA surveillance pathway	24.7451	18	0.00435815	0.00435815	DAZAP1, CPSF7, RBM8A, PABPC4, UPF3B, PPP2R2A, CASC3, PPP2R5C, SRRM1, PPP1CA, NXF1, PPP2R1B, DDX39B, PPP2R3C, PAPOLG, ACIN1, PABPC1, PABPC1L
hsa05166	Human T-cell leukemia virus 1 infection	22.0529	34	0.00174992	0.00174992	ATF2, XIAP, GPS2, PIK3CD, CD3D, MAPK9, HLA-DMA, CCND3, PPP3CC, XPO1, CREB3L4, CHEK2, AKT2, CDC27, AKT1, IKBKG, HRAS, CREBBP, RANBP3, MAP2K2, NFATC3, HLA-C, HLA-A, HLA-F, CD4, ESPL1, CCNE1, LCK, CDC16, BAX, ANAPC5, RAN, ATF4, ATR
hsa04210	Apoptosis	20.5466	24	0.00464498	0.00464498	DFFB, BECN1, DAXX, MAP2K2, DIABLO, HTRA2, PIK3CD, XIAP, TUBA4A, MAPK9, BCL2L11, CASP8, TUBA1A, AKT2, DDIT3, LMNA, AKT1, BAX, IKBKG, BID, HRAS, SPTAN1, ATF4, CTSB
hsa04660	T cell receptor signaling pathway	18.9954	18	0.0119403	0.0119403	ITK, GSK3B, MAP2K2, NFATC3, PIK3CD, RASGRP1, CD3D, MAPK9, CD4, PPP3CC, LCK, AKT2, AKT1, FYN, PTPN6, IKBKG, CD247, HRAS
